# Supplementary material for: The first water coordination sphere of lanthanide(iii) motexafins (Ln-Motex2+, Ln = La, Gd, Lu) and its effects on structures, reduction potentials and UV-vis absorption spectra. Theoretical studies
Source: Royal Society of Chemistry journal article supplement (doi:10.1039/c7cp02861j), 2017-01-01
Supplement: c7cp02861j1.pdf [file c7cp02861j1.pdf]

## Supplementary Material

for

"The First Coordination Sphere of Lanthanide (III) Motexafins (Ln-Motex<sup>2+</sup>, Ln=La, Gd, Lu) and its Effects on Structure, Reduction Potentials and UV-Vis Absorption Spectra. Theoretical Studies"

Authors: X. Cao, N. Heinz, J. Zhang, M. Dolg

Journal: PCCP

## Contents

- I. **[La-Tex]<sup>2+</sup> and [Mg-Por]<sup>0</sup> Model Systems**
  - a. Structures
  - b. Cartesian Coordinates of Optimized Structures of [M-Por]<sup>n+</sup> (M=Mg, n=0; M=La, n=1) and [M-Tex]<sup>n+</sup> (M=Mg, n=1; M=La, n=2) Model Complexes
  - c. Orbital Isosurfaces of [La-Tex]<sup>2+</sup>
  - d. UV-Vis Absorption Spectra of [La-Tex]<sup>2+</sup>
  - e. UV-Vis Absorption Spectra of [M-Por]<sup>n+</sup> (M=Mg, n=0; M=La, n=1) and [M-Tex]<sup>n+</sup> (M=Mg, n=1; M=La, n=2)
- II. **Lanthanide Motexafins [Ln-Motex]<sup>2+</sup> (Ln=La, Gd, Lu)**
  - a. Cartesian Coordinates of Optimized Structures of Lanthanide Motexafin Complexes (Ln=La, Gd, Lu)
  - b. TD-DFT/BP86 and B3LYP UV-Vis Absorption Spectra of Lutetium Motexafin [Lu-Motex]<sup>2+</sup> in Comparison to Experimental Data
  - c. UV-Vis Absorption Spectra of Motexafin (Motex) Complexes of La, Gd and Lu from TD-DFT Calculations
  - d. Spin-orbit Effects on the TD-DFT/BP86 Absorption Spectrum of a C<sub>30</sub>H<sub>30</sub>N<sub>5</sub>Lu Model System

## I. [La-Tex]<sup>2+</sup> and [Mg-Por]<sup>0</sup> Model Systems

### I.a Structures

In the following orbital plots and UV-Vis spectra Tex stands for the inner macrocyclic ringsystem without side chains, which is common to both texaphyrin and motexafin. Model calculations were performed for [La-Tex]<sup>2+</sup> (C<sub>s</sub> symmetry) and [Mg-Tex]<sup>0</sup> (C<sub>2v</sub> symmetry).

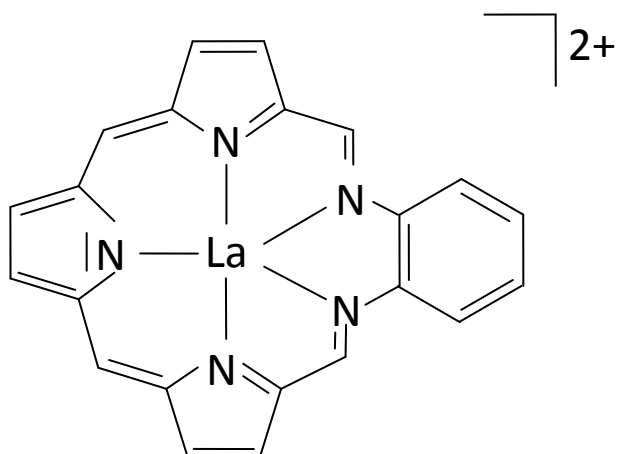

Scheme 1: [La-Tex]<sup>2+</sup> model system.

The UV-Vis spectra of the above model systems are compared to those obtained for a porphyrin ligand (Por), i.e., [La-Por]<sup>+</sup> (C<sub>4v</sub> symmetry) and [Mg-Por] (D<sub>4h</sub> symmetry).

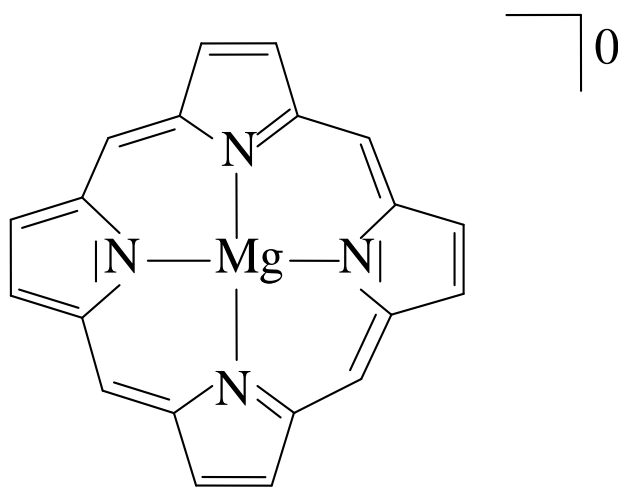

**Scheme 2: [Mg-Por]<sup>0</sup> model system.**

The calculations were performed with DFT/BP86 as well as DFT/B3LYP, def2-TZVP basis sets and a large-core pseudopotential for La (ECP46MWB). The TURBOMOLE quantum chemistry code and the TmoleX visualization tool was applied to plot the orbitals. UV-Vis spectra were obtained from the calculated TD-DFT wavelengths and oscillator strengths using a superposition of Gaussian functions with exponents 0.0015 for broadening. The plots were generated with the program xmgrace.

# I.b Cartesian Coordinates of Optimized Structures of [M-Por]<sup>n+</sup> (M=Mg, n=0; M=La, n=1) and [M-TeX]<sup>n+</sup> (M=Mg, n=1; M=La, n=2) Model Complexes

Program used: TURBOMOLE V 6.3 and V6.6

All energies are given in units of Hartree

All cartesian atomic coordinates are given in units of Bohr

\*\*\*\*\*

The input coordinates given below are for the optimized structures for basis sets B (cf. text). A scalar-relativistic large-core pseudopotential was used for La (ECP46MWB).

Mg-Por{0}:

input coordinates and input keywords

Energy: -1189.026432347

\$symmetry d4h

\$dft

functional b-p

gridsize 5

\$coord

|                    |                    |                    |    |
|--------------------|--------------------|--------------------|----|
| 0.0000000000000000 | 0.0000000000000000 | 0.0000000000000000 | mg |
| 0.0000000000000000 | 3.90226867673658   | 0.0000000000000000 | n  |
| -3.90226867673658  | 0.0000000000000000 | 0.0000000000000000 | n  |
| 0.0000000000000000 | -3.90226867673658  | 0.0000000000000000 | n  |
| 3.90226867673658   | 0.0000000000000000 | 0.0000000000000000 | n  |
| 2.09070768773674   | -5.44926689609175  | 0.0000000000000000 | c  |
| 5.44926689609175   | 2.09070768773674   | 0.0000000000000000 | c  |
| -2.09070768773674  | 5.44926689609175   | 0.0000000000000000 | c  |
| -5.44926689609175  | -2.09070768773674  | 0.0000000000000000 | c  |
| 2.09070768773674   | 5.44926689609175   | 0.0000000000000000 | c  |
| 5.44926689609175   | -2.09070768773674  | 0.0000000000000000 | c  |
| -2.09070768773674  | -5.44926689609175  | 0.0000000000000000 | c  |
| -5.44926689609175  | 2.09070768773674   | 0.0000000000000000 | c  |
| 1.29350846917633   | 8.06479622908092   | 0.0000000000000000 | c  |
| -8.06479622908092  | 1.29350846917633   | 0.0000000000000000 | c  |
| -1.29350846917633  | -8.06479622908092  | 0.0000000000000000 | c  |
| 8.06479622908092   | -1.29350846917633  | 0.0000000000000000 | c  |
| 1.29350846917633   | -8.06479622908092  | 0.0000000000000000 | c  |
| -8.06479622908092  | -1.29350846917633  | 0.0000000000000000 | c  |
| -1.29350846917633  | 8.06479622908092   | 0.0000000000000000 | c  |
| 8.06479622908092   | 1.29350846917633   | 0.0000000000000000 | c  |
| 4.60188816079825   | 4.60188816079825   | 0.0000000000000000 | c  |
| -4.60188816079825  | 4.60188816079825   | 0.0000000000000000 | c  |
| -4.60188816079825  | -4.60188816079825  | 0.0000000000000000 | c  |
| 4.60188816079825   | -4.60188816079825  | 0.0000000000000000 | c  |
| 6.06023556199707   | 6.06023556199707   | 0.0000000000000000 | h  |
| -6.06023556199707  | 6.06023556199707   | 0.0000000000000000 | h  |
| -6.06023556199707  | -6.06023556199707  | 0.0000000000000000 | h  |
| 6.06023556199707   | -6.06023556199707  | 0.0000000000000000 | h  |
| 9.68662668102763   | 2.55462778373038   | 0.0000000000000000 | h  |
| -2.55462778373038  | 9.68662668102763   | 0.0000000000000000 | h  |

```

-9.68662668102763      -2.55462778373038      0.0000000000000000    h
 2.55462778373038      -9.68662668102763      0.0000000000000000    h
 9.68662668102763      -2.55462778373038      0.0000000000000000    h
-2.55462778373038      -9.68662668102763      0.0000000000000000    h
-9.68662668102763      2.55462778373038      0.0000000000000000    h
 2.55462778373038      9.68662668102763      0.0000000000000000    h
$user-defined bonds
$end

La-Por{1+}:
input coordinates and input keywords
Energy: -1020.37616990916
$symmetry c4v
$dft
  functional b-p
  gridsize 5
$COORD
  0.0000000000000000      0.0000000000000000      2.76873930988451      la
  0.0000000000000000      3.96983403347725      0.55944302284604      n
-3.96983403347725      0.0000000000000000      0.55944302284604      n
  0.0000000000000000      -3.96983403347725      0.55944302284604      n
  3.96983403347725      0.0000000000000000      0.55944302284604      n
  2.10805931075750      -5.48405924211208      0.23490999582939      c
  5.48405924211208      2.10805931075750      0.23490999582939      c
-2.10805931075750      5.48405924211208      0.23490999582939      c
-5.48405924211208      -2.10805931075750      0.23490999582939      c
  2.10805931075750      5.48405924211208      0.23490999582939      c
  5.48405924211208      -2.10805931075750      0.23490999582939      c
-2.10805931075750      -5.48405924211208      0.23490999582939      c
-5.48405924211208      2.10805931075750      0.23490999582939      c
  1.29446600956499      8.05061288492005      -0.21035541740218      c
-8.05061288492005      1.29446600956499      -0.21035541740218      c
-1.29446600956499      -8.05061288492005      -0.21035541740218      c
  8.05061288492005      -1.29446600956499      -0.21035541740218      c
  1.29446600956499      -8.05061288492005      -0.21035541740218      c
-8.05061288492005      -1.29446600956499      -0.21035541740218      c
-1.29446600956499      8.05061288492005      -0.21035541740218      c
  8.05061288492005      1.29446600956499      -0.21035541740218      c
  4.61377843298900      4.61377843298900      0.17153669157488      c
-4.61377843298900      4.61377843298900      0.17153669157488      c
-4.61377843298900      -4.61377843298900      0.17153669157488      c
  4.61377843298900      -4.61377843298900      0.17153669157488      c
  6.05730368777488      6.05730368777488      -0.11627695603158      h
-6.05730368777488      6.05730368777488      -0.11627695603158      h
-6.05730368777488      -6.05730368777488      -0.11627695603158      h
  6.05730368777488      -6.05730368777488      -0.11627695603158      h
  9.64303022460962      2.54528589814625      -0.55299837134757      h
-2.54528589814625      9.64303022460962      -0.55299837134757      h
-9.64303022460962      -2.54528589814625      -0.55299837134757      h
  2.54528589814625      -9.64303022460962      -0.55299837134757      h
  9.64303022460962      -2.54528589814625      -0.55299837134757      h
-2.54528589814625      -9.64303022460962      -0.55299837134757      h
-9.64303022460962      2.54528589814625      -0.55299837134757      h
  2.54528589814625      9.64303022460962      -0.55299837134757      h
$end

Mg-TeX{1+}:

```

input coordinates and input keywords

Energy: -1320.997321410

\$symmetry c2v

\$dft

functional b-p

gridsize 5

\$coord

|                   |                   |                    |    |
|-------------------|-------------------|--------------------|----|
| 0.000000000000000 | 0.000000000000000 | -0.00766049709667  | mg |
| 0.000000000000000 | 0.000000000000000 | -4.26881641261823  | n  |
| -2.45096546856552 | 0.000000000000000 | 4.32398390193171   | n  |
| 2.45096546856552  | 0.000000000000000 | 4.32398390193171   | n  |
| -4.06573302934695 | 0.000000000000000 | -0.52092504721885  | n  |
| 4.06573302934695  | 0.000000000000000 | -0.52092504721885  | n  |
| -2.66038619468382 | 0.000000000000000 | 9.01339722653809   | c  |
| 2.66038619468382  | 0.000000000000000 | 9.01339722653809   | c  |
| -1.35555465979436 | 0.000000000000000 | 6.67622512967927   | c  |
| 1.35555465979436  | 0.000000000000000 | 6.67622512967927   | c  |
| 1.33619009465224  | 0.000000000000000 | 11.26186314834687  | c  |
| -1.33619009465224 | 0.000000000000000 | 11.26186314834687  | c  |
| -4.89031894208279 | 0.000000000000000 | 3.96499421906642   | c  |
| 4.89031894208279  | 0.000000000000000 | 3.96499421906642   | c  |
| -5.75116792975639 | 0.000000000000000 | 1.42678808641339   | c  |
| 5.75116792975639  | 0.000000000000000 | 1.42678808641339   | c  |
| -5.53388563008337 | 0.000000000000000 | -2.67681644674320  | c  |
| 5.53388563008337  | 0.000000000000000 | -2.67681644674320  | c  |
| -8.31876238414557 | 0.000000000000000 | 0.55486425532940   | c  |
| 8.31876238414557  | 0.000000000000000 | 0.55486425532940   | c  |
| -4.59684315828511 | 0.000000000000000 | -5.12893842397108  | c  |
| 4.59684315828511  | 0.000000000000000 | -5.12893842397108  | c  |
| -2.05770965360799 | 0.000000000000000 | -5.86597125173972  | c  |
| 2.05770965360799  | 0.000000000000000 | -5.86597125173972  | c  |
| 1.28790509413637  | 0.000000000000000 | -8.48613793880356  | c  |
| -1.28790509413637 | 0.000000000000000 | -8.48613793880356  | c  |
| 8.18665219506485  | 0.000000000000000 | -2.03047080605879  | c  |
| -8.18665219506485 | 0.000000000000000 | -2.03047080605879  | c  |
| -2.56593009829349 | 0.000000000000000 | -10.09317675576040 | h  |
| 2.56593009829349  | 0.000000000000000 | -10.09317675576040 | h  |
| -9.99270600139220 | 0.000000000000000 | 1.74310105557470   | h  |
| 9.99270600139220  | 0.000000000000000 | 1.74310105557470   | h  |
| 9.73413306026754  | 0.000000000000000 | -3.38044031221072  | h  |
| -9.73413306026754 | 0.000000000000000 | -3.38044031221072  | h  |
| 2.35522723468817  | 0.000000000000000 | 13.05253785928624  | h  |
| -2.35522723468817 | 0.000000000000000 | 13.05253785928624  | h  |
| -4.71879709420213 | 0.000000000000000 | 9.05567730810048   | h  |
| 4.71879709420213  | 0.000000000000000 | 9.05567730810048   | h  |
| 6.29325492590607  | 0.000000000000000 | 5.49231617818378   | h  |
| -6.29325492590607 | 0.000000000000000 | 5.49231617818378   | h  |
| 5.98895408000285  | 0.000000000000000 | -6.65020704145737  | h  |
| -5.98895408000285 | 0.000000000000000 | -6.65020704145737  | h  |

\$end

La-Tex{2+}:

input coordinates and input keywords

Energy: -1152.282555433

\$symmetry cs

\$dft

functional b-p

```

gridsize 5
$coord
-0.00641134795624      0.02828013777421      0.0000000000000000    la
-4.81132972101778      0.02923501698806      0.0000000000000000    n
 3.44582215179102      2.49367946182532      -2.52833989883181     n
 3.44582215179102      2.49367946182532      2.52833989883181     n
-1.29180980510179      1.38939481303799      4.23047753280381     n
-1.29180980510179      1.38939481303799     -4.23047753280381     n
 7.97247986886390      3.68993661302022     -2.66216907700546     c
 7.97247986886390      3.68993661302022      2.66216907700546     c
 5.72260550369673      3.07655090741766     -1.36271890345225     c
 5.72260550369673      3.07655090741766      1.36271890345225     c
10.14572462627036      4.27872256395233      1.33512426279900     c
10.14572462627036      4.27872256395233     -1.33512426279900     c
 2.95702821517125      2.89529972931024     -4.94062240644242     c
 2.95702821517125      2.89529972931024      4.94062240644242     c
 0.50537610835823      2.28576401501107      5.86713547569544     c
 0.50537610835823      2.28576401501107     -5.86713547569544     c
-3.44200949800528      0.98937868376536     -5.64422182663612     c
-3.44200949800528      0.98937868376536      5.64422182663612     c
-2.95069595416463      1.63909450461234     -8.25017744952766     c
-2.95069595416463      1.63909450461234      8.25017744952766     c
-5.73865077417632      0.16864414205097     -4.63332370208997     c
-5.73865077417632      0.16864414205097      4.63332370208997     c
-6.38019013455482     -0.23111284091370     -2.08196058005926     c
-6.38019013455482     -0.23111284091370      2.08196058005926     c
-8.93152188018609     -0.78358246838433      1.29126039304700     c
-8.93152188018609     -0.78358246838433     -1.29126039304700     c
-0.49082669226311      2.47225443760601      8.37989887334333     c
-0.49082669226311      2.47225443760601     -8.37989887334333     c
-4.30989633614864      1.51396429214111      9.78508056808809     h
-4.30989633614864      1.51396429214111     -9.78508056808809     h
 4.33696002368173      3.73694041922826     -6.23259790371924     h
 4.33696002368173      3.73694041922826      6.23259790371924     h
 0.51984003259913      3.13801221479941      10.03877625843513     h
 0.51984003259913      3.13801221479941     -10.03877625843513     h
-10.52365592647394     -1.07626932667235     -2.55522736622349     h
-10.52365592647394     -1.07626932667235      2.55522736622349     h
11.88200146543749      4.71367550543324      2.35501647218371     h
11.88200146543749      4.71367550543324     -2.35501647218371     h
 8.02785153816106      3.64958531720271     -4.71990267419009     h
 8.02785153816106      3.64958531720271      4.71990267419009     h
-7.27893281092065     -0.09635599382893     -5.97947581220406     h
-7.27893281092065     -0.09635599382893      5.97947581220406     h

```

\$end

La-Tex{2+}:

input coordinates and input keywords

Energy: -1151.451132042

\$symmetry cs

\$dft

functional b3-lyp

gridsize 5

\$coord

```

 0.00786351726535      -0.04106290429020      0.0000000000000000    la
-4.80257595945856     -0.00786607645340      0.0000000000000000    n
 3.45733228862855      2.45621668104915     -2.53215659671373     n

```



|                    |                   |                   |   |
|--------------------|-------------------|-------------------|---|
| 3.45733228862855   | 2.45621668104915  | 2.53215659671373  | n |
| -1.27491600223196  | 1.33867330580490  | 4.22865549490517  | n |
| -1.27491600223196  | 1.33867330580490  | -4.22865549490517 | n |
| 7.95879898563286   | 3.68261381613768  | -2.64524959929876 | c |
| 7.95879898563286   | 3.68261381613768  | 2.64524959929876  | c |
| 5.72336788448860   | 3.05629107146076  | -1.35234424957033 | c |
| 5.72336788448860   | 3.05629107146076  | 1.35234424957033  | c |
| 10.11802895769101  | 4.28920643014498  | 1.32795141595875  | c |
| 10.11802895769101  | 4.28920643014498  | -1.32795141595875 | c |
| 2.95119489707461   | 2.88150144618995  | -4.90964393226199 | c |
| 2.95119489707461   | 2.88150144618995  | 4.90964393226199  | c |
| 0.49821959923551   | 2.26004420025620  | 5.83957301865703  | c |
| 0.49821959923551   | 2.26004420025620  | -5.83957301865703 | c |
| -3.42933746175497  | 0.96483491372929  | -5.62505974551631 | c |
| -3.42933746175497  | 0.96483491372929  | 5.62505974551631  | c |
| -2.94849279413384  | 1.65360890328704  | -8.21017515933510 | c |
| -2.94849279413384  | 1.65360890328704  | 8.21017515933510  | c |
| -5.71570418660658  | 0.16034561243938  | -4.61635276685774 | c |
| -5.71570418660658  | 0.16034561243938  | 4.61635276685774  | c |
| -6.36031889295750  | -0.24437423408186 | -2.07249016964043 | c |
| -6.36031889295750  | -0.24437423408186 | 2.07249016964043  | c |
| -8.90577518042120  | -0.75941048796275 | 1.28564938705172  | c |
| -8.90577518042120  | -0.75941048796275 | -1.28564938705172 | c |
| -0.50091947801868  | 2.48648880300020  | 8.33371397912678  | c |
| -0.50091947801868  | 2.48648880300020  | -8.33371397912678 | c |
| -4.30430495660595  | 1.55716394882571  | 9.73041506417987  | h |
| -4.30430495660595  | 1.55716394882571  | -9.73041506417987 | h |
| 4.29749391909618   | 3.75472462418912  | -6.19110351406139 | h |
| 4.29749391909618   | 3.75472462418912  | 6.19110351406139  | h |
| 0.49450605289822   | 3.18057695234169  | 9.97154731735152  | h |
| 0.49450605289822   | 3.18057695234169  | -9.97154731735152 | h |
| -10.49221642015325 | -1.02446025165658 | -2.53870537469529 | h |
| -10.49221642015325 | -1.02446025165658 | 2.53870537469529  | h |
| 11.83583250151632  | 4.73732421791364  | 2.34251368428897  | h |
| 11.83583250151632  | 4.73732421791364  | -2.34251368428897 | h |
| 8.01424111497546   | 3.64210140269542  | -4.68738376990824 | h |
| 8.01424111497546   | 3.64210140269542  | 4.68738376990824  | h |
| -7.25104541971506  | -0.07667229755576 | -5.95021755735321 | h |
| -7.25104541971506  | -0.07667229755576 | 5.95021755735321  | h |

\$end

## I.c Orbital Isosurfaces of $[\text{La-Tex}]^{2+}$

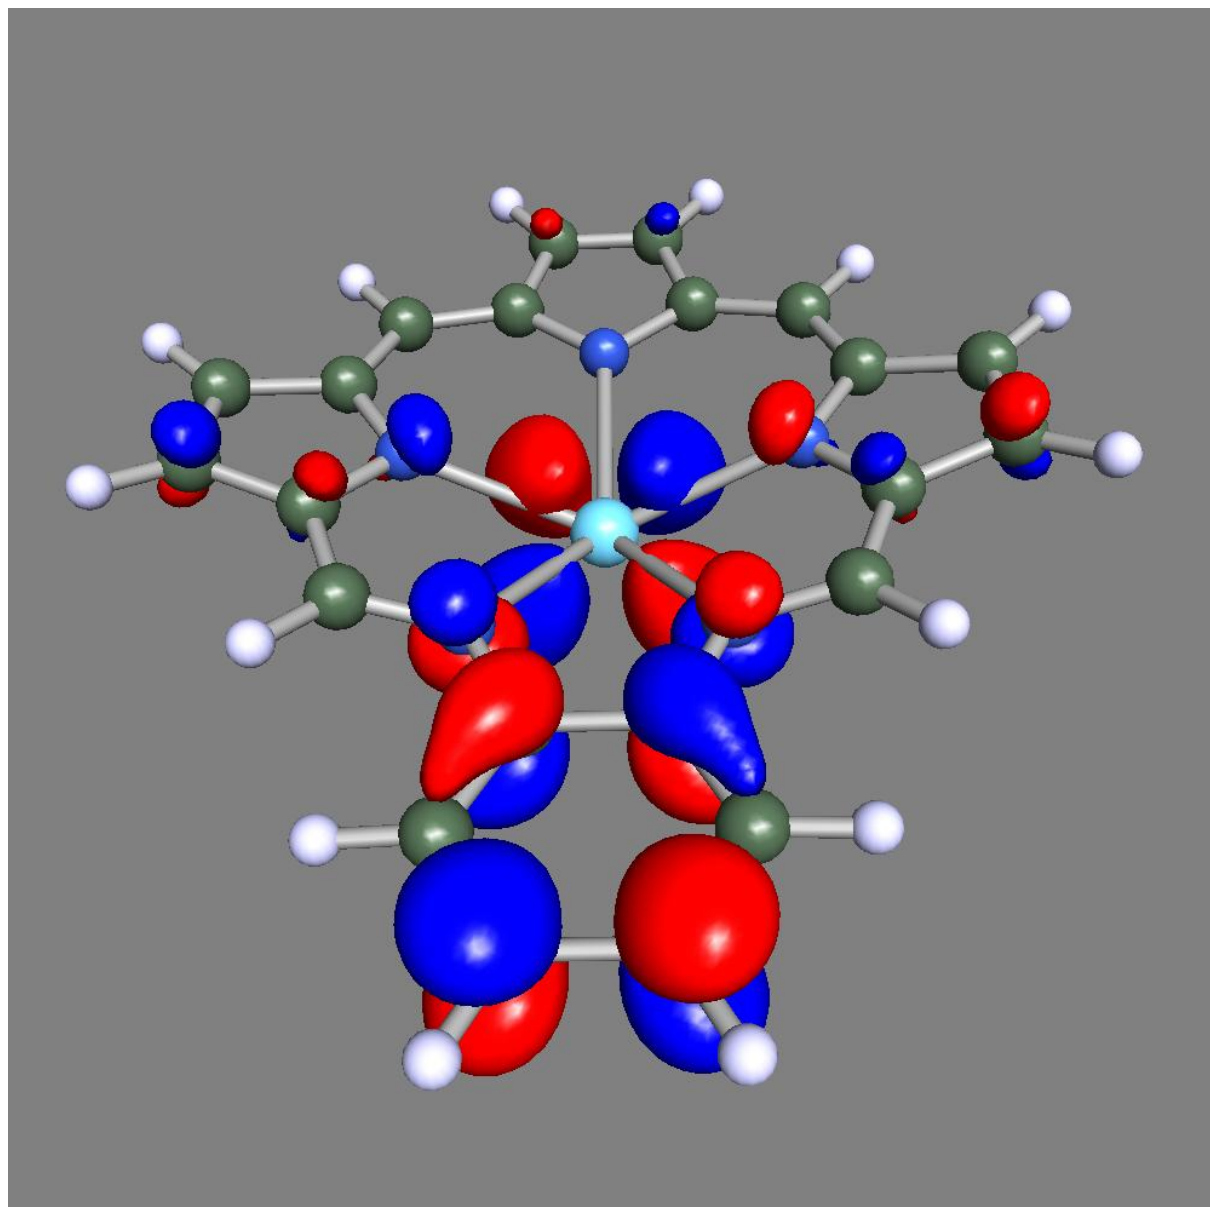

Fig. S1a:

LUMO+9 of  $[\text{La-Tex}]^{2+}$

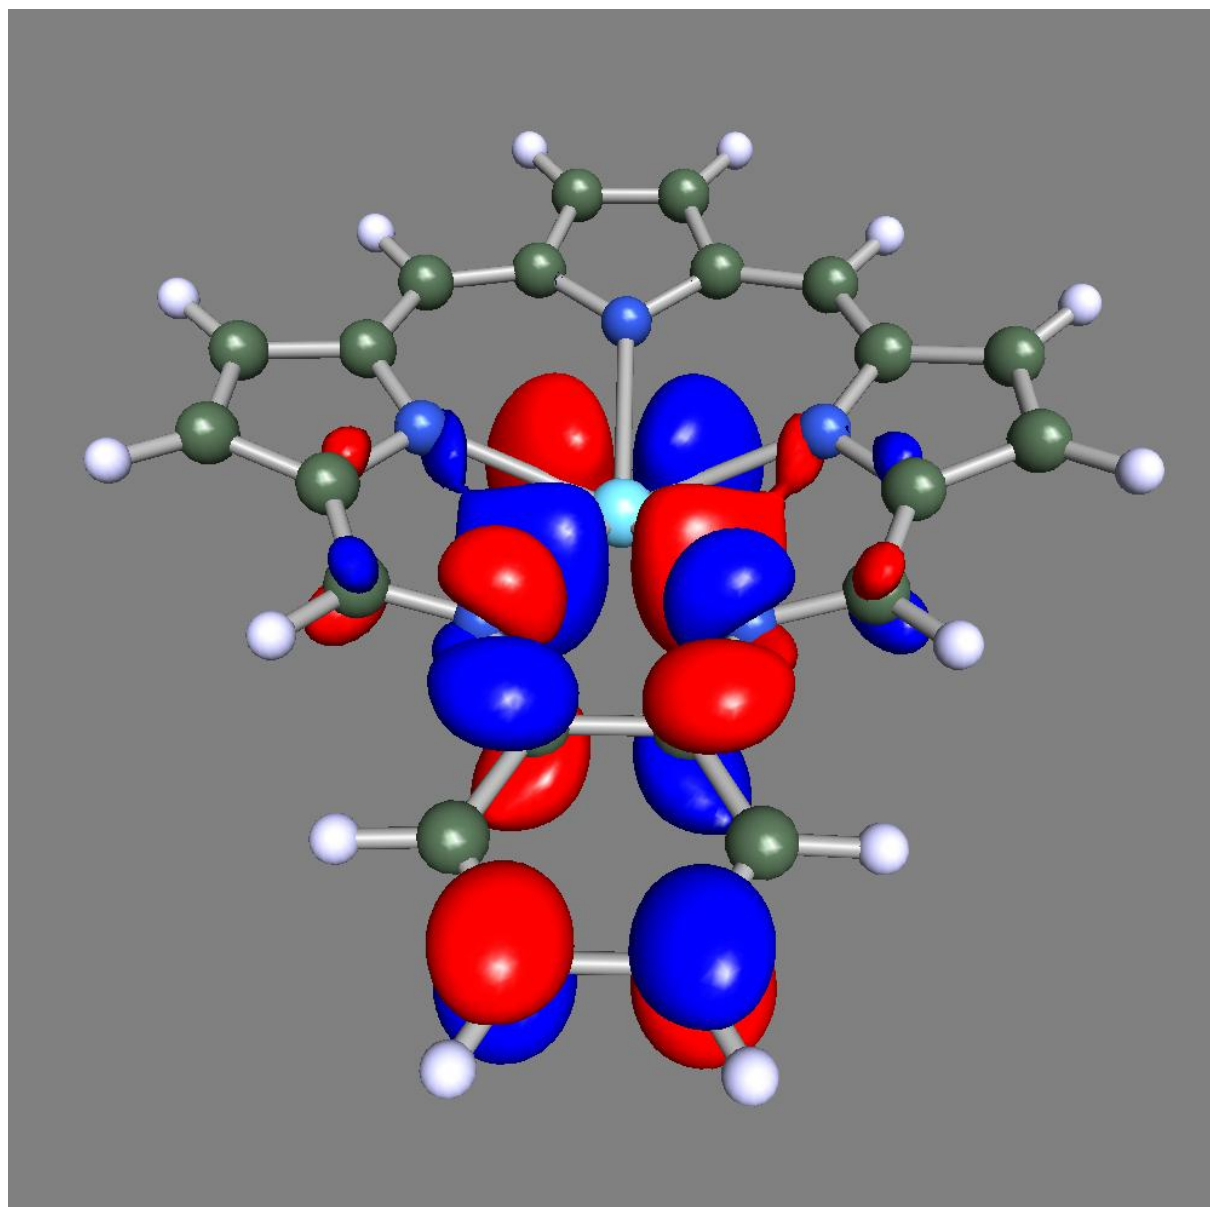

**Fig. S1b:**

**LUMO+8 of [La-Tex]<sup>2+</sup>**

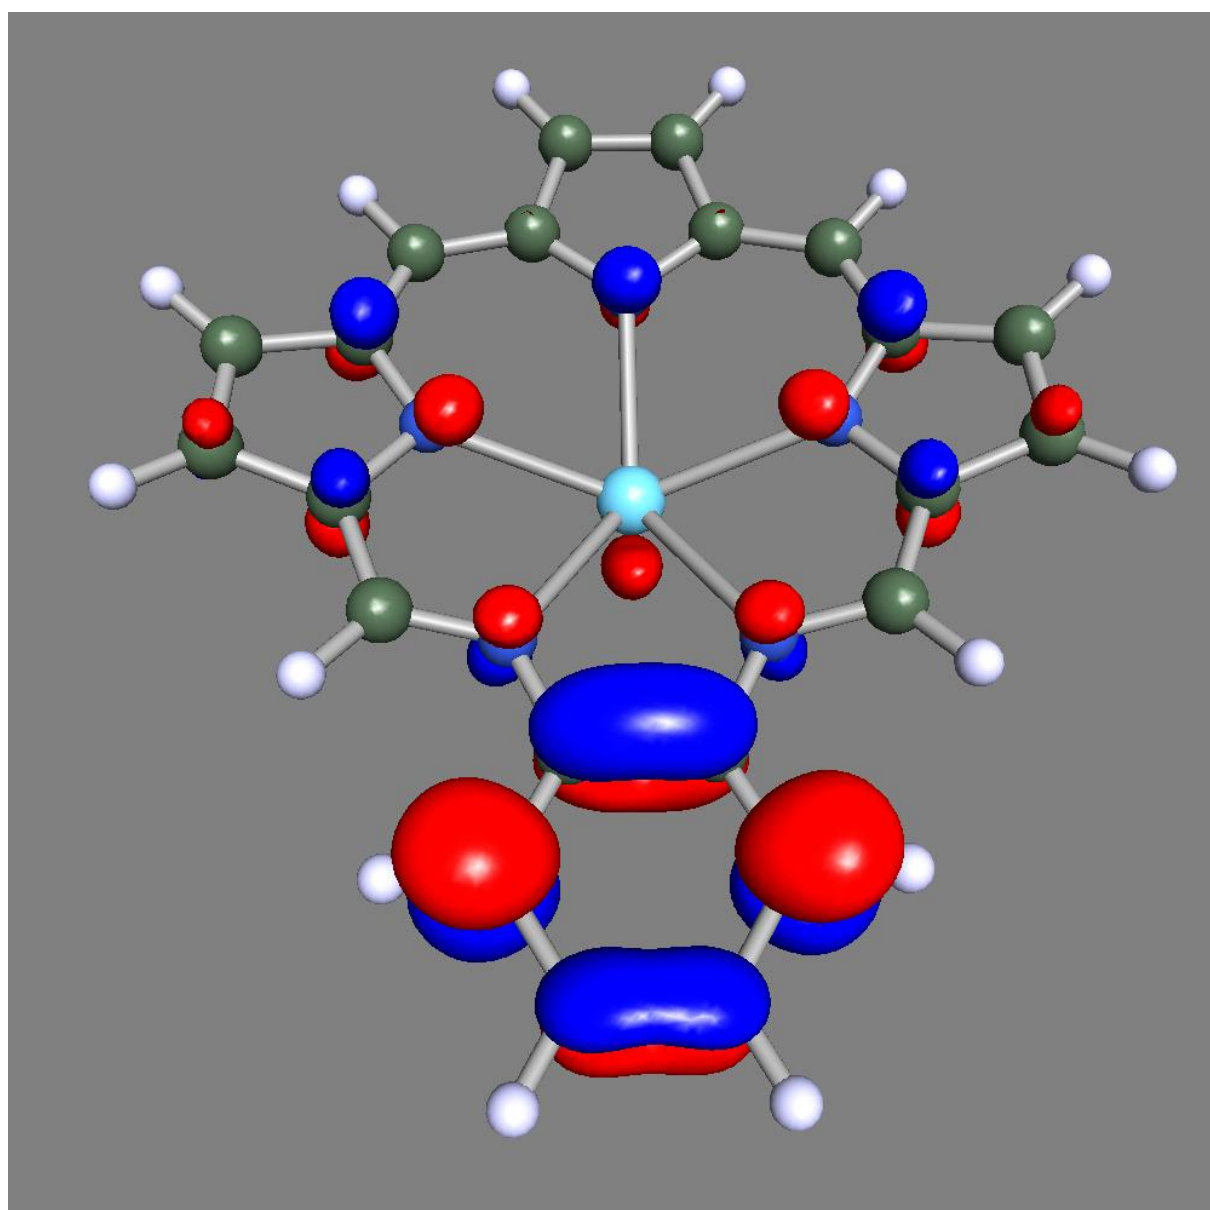

**Fig. S1c:**

**LUMO+7 of [La-Tex]<sup>2+</sup>**

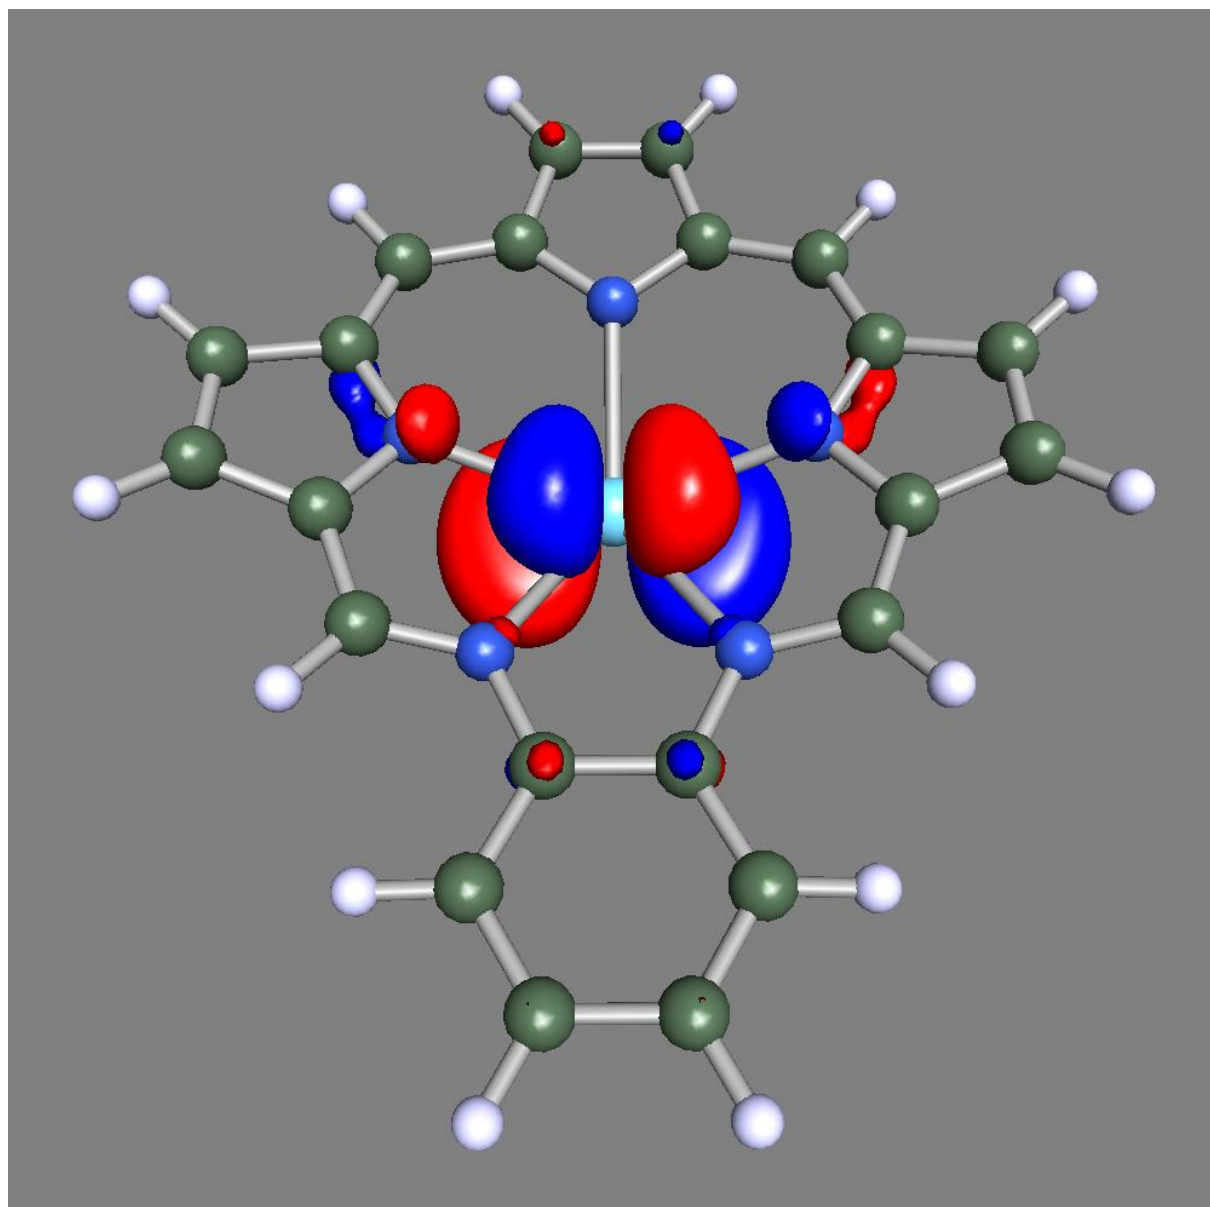

**Fig. S1d:**

**LUMO+6 of [La-Tex]<sup>2+</sup>**

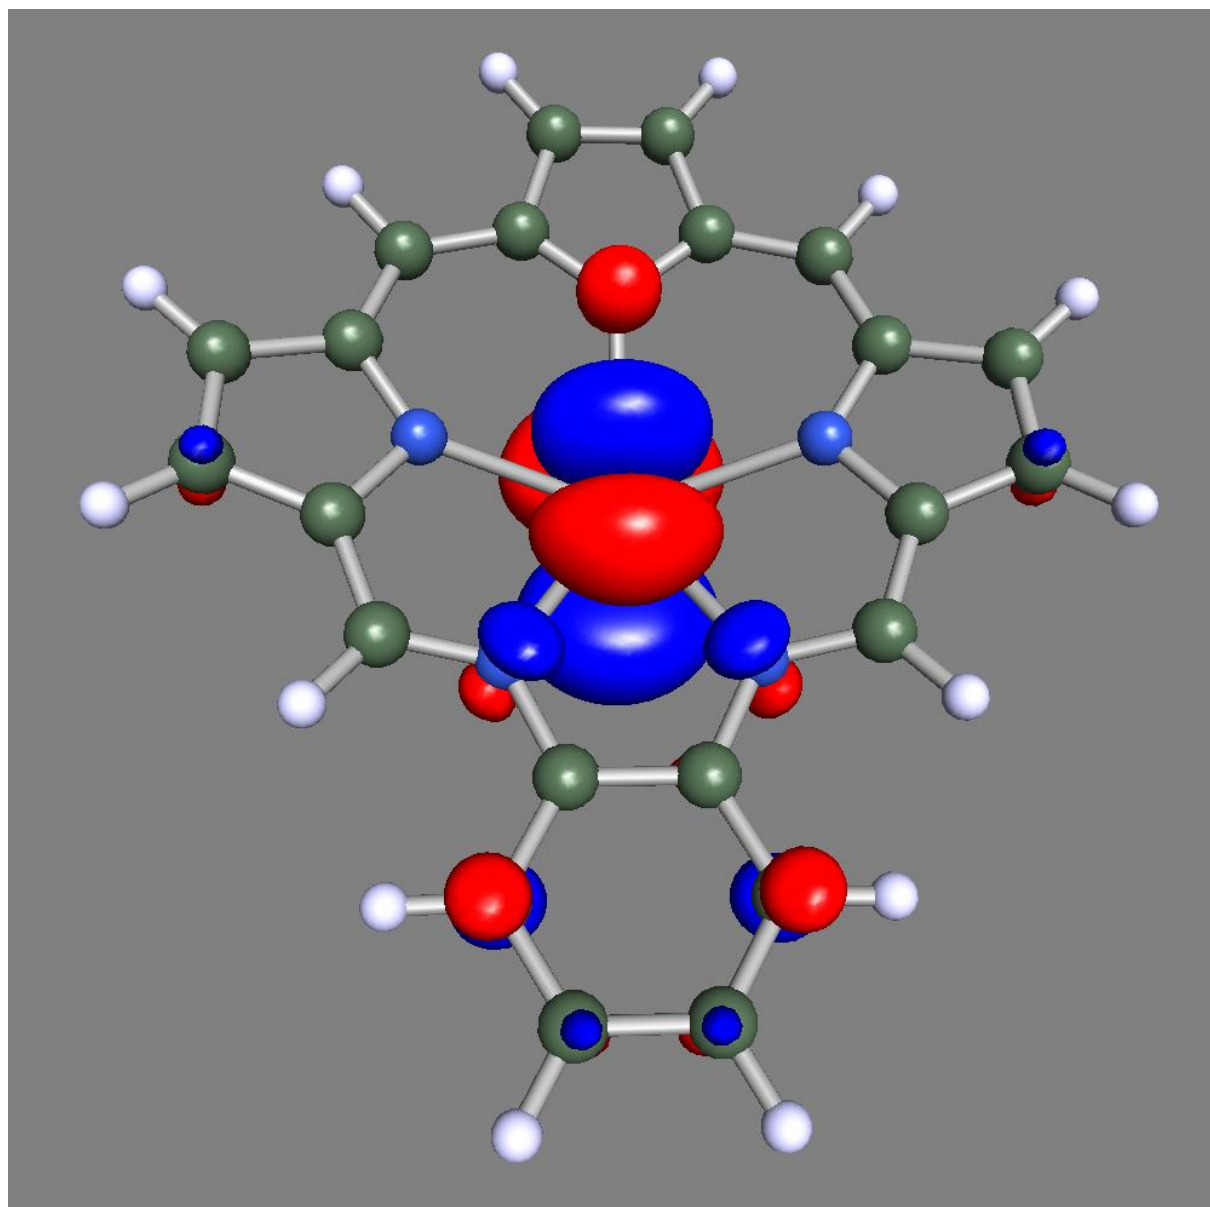

**Fig. S1e:**

**LUMO+5 of [La-Tex]<sup>2+</sup>**

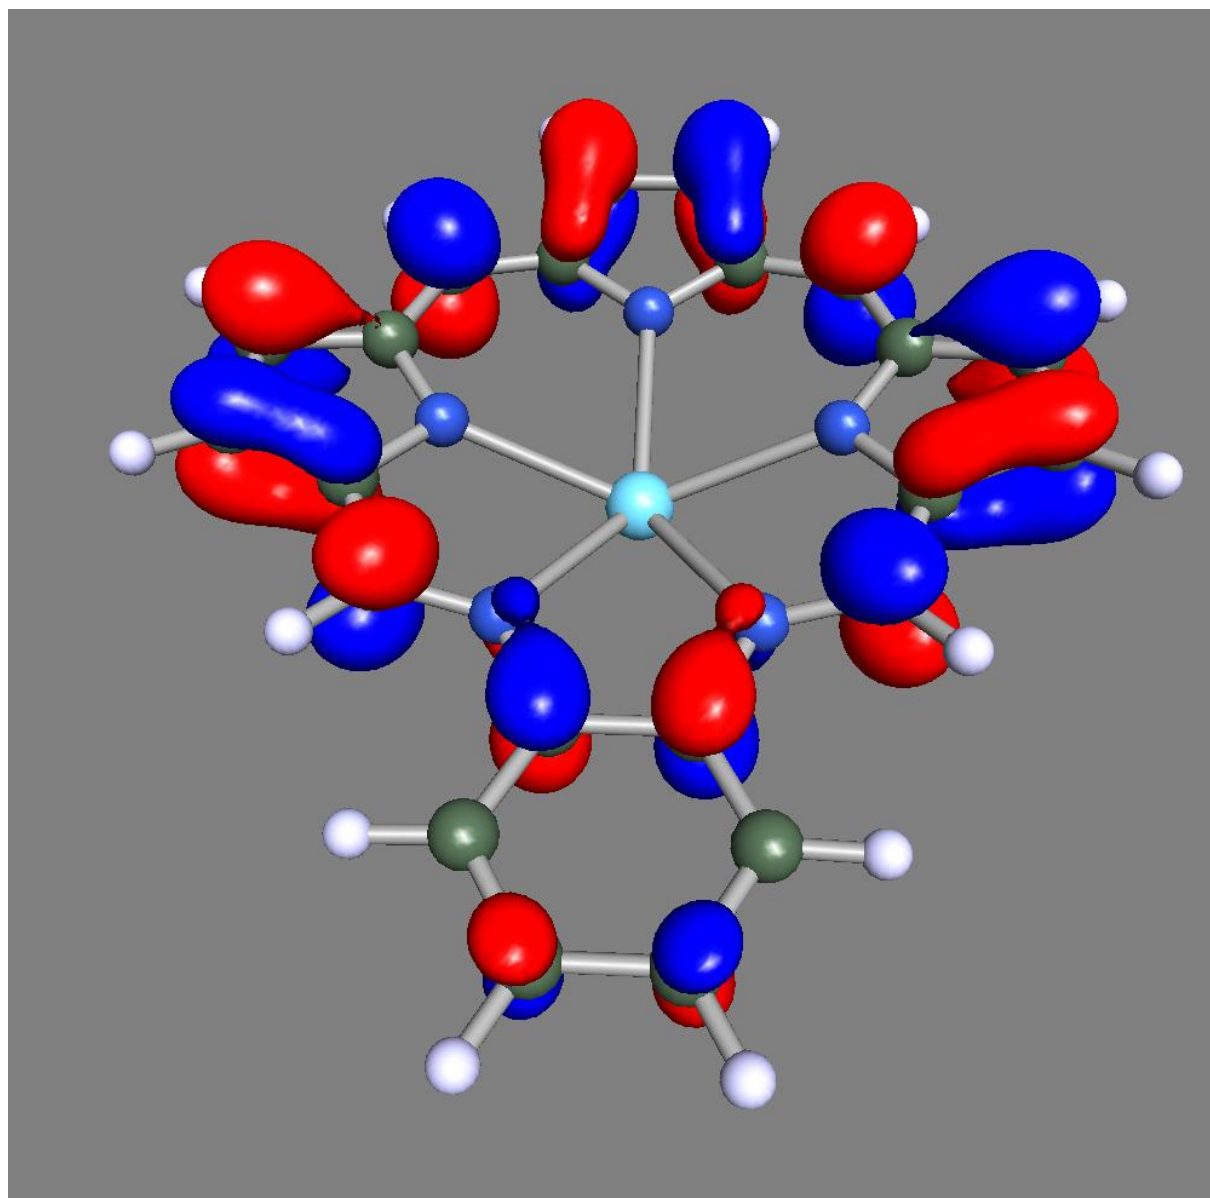

**Fig. S1f:**  
**LUMO+4 of [La-Tex]<sup>2+</sup>**

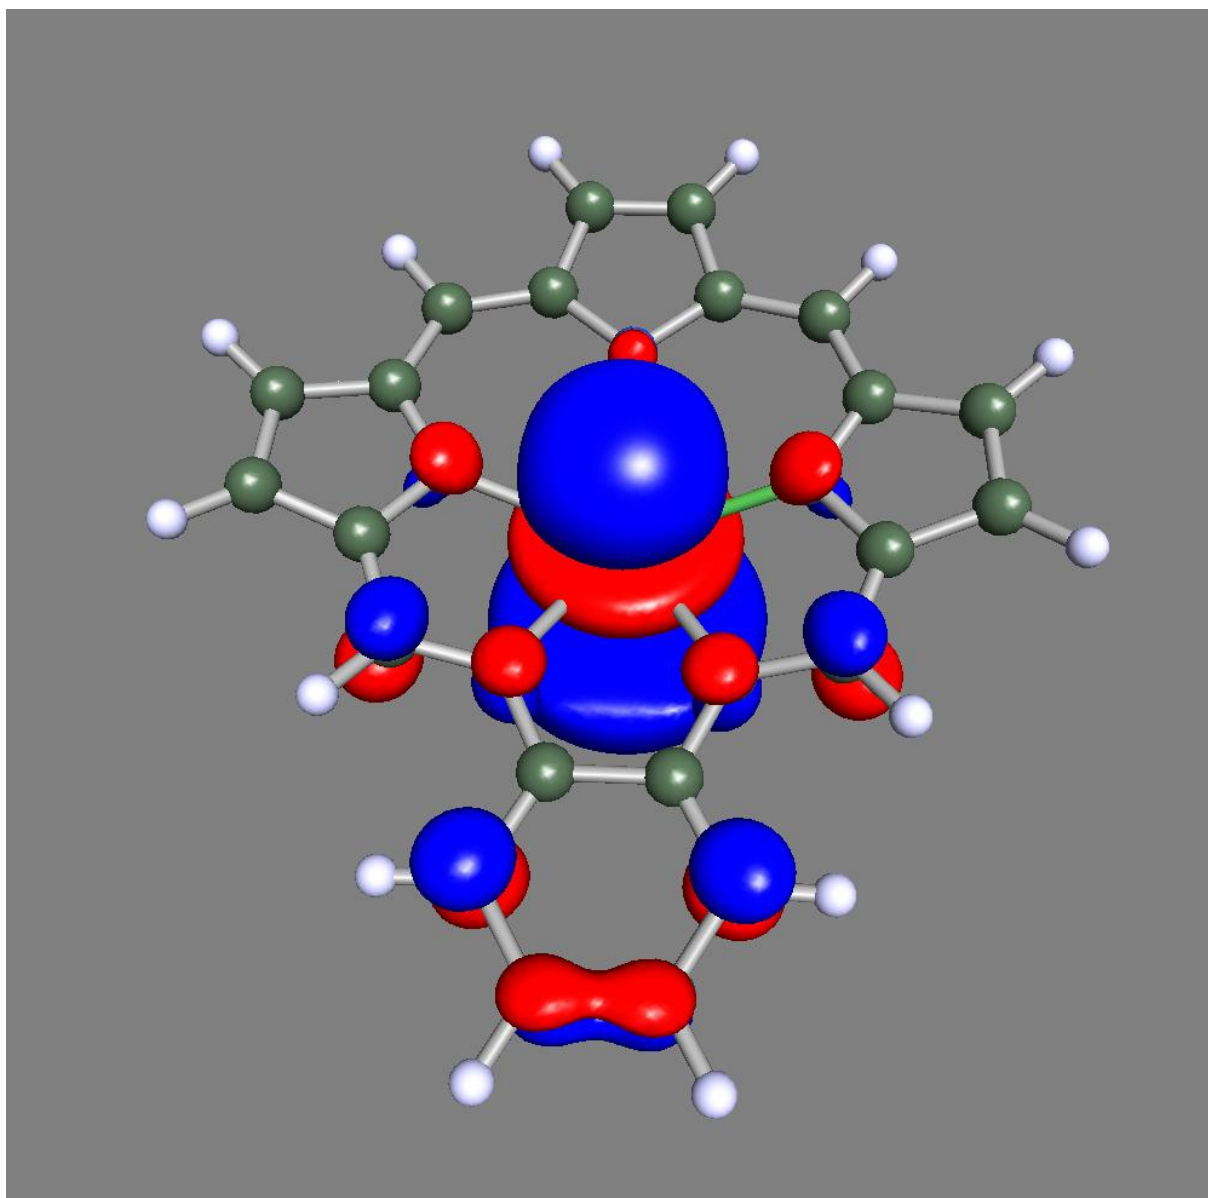

**Fig. S1g:**  
**LUMO+3 of [La-Tex]<sup>2+</sup>**



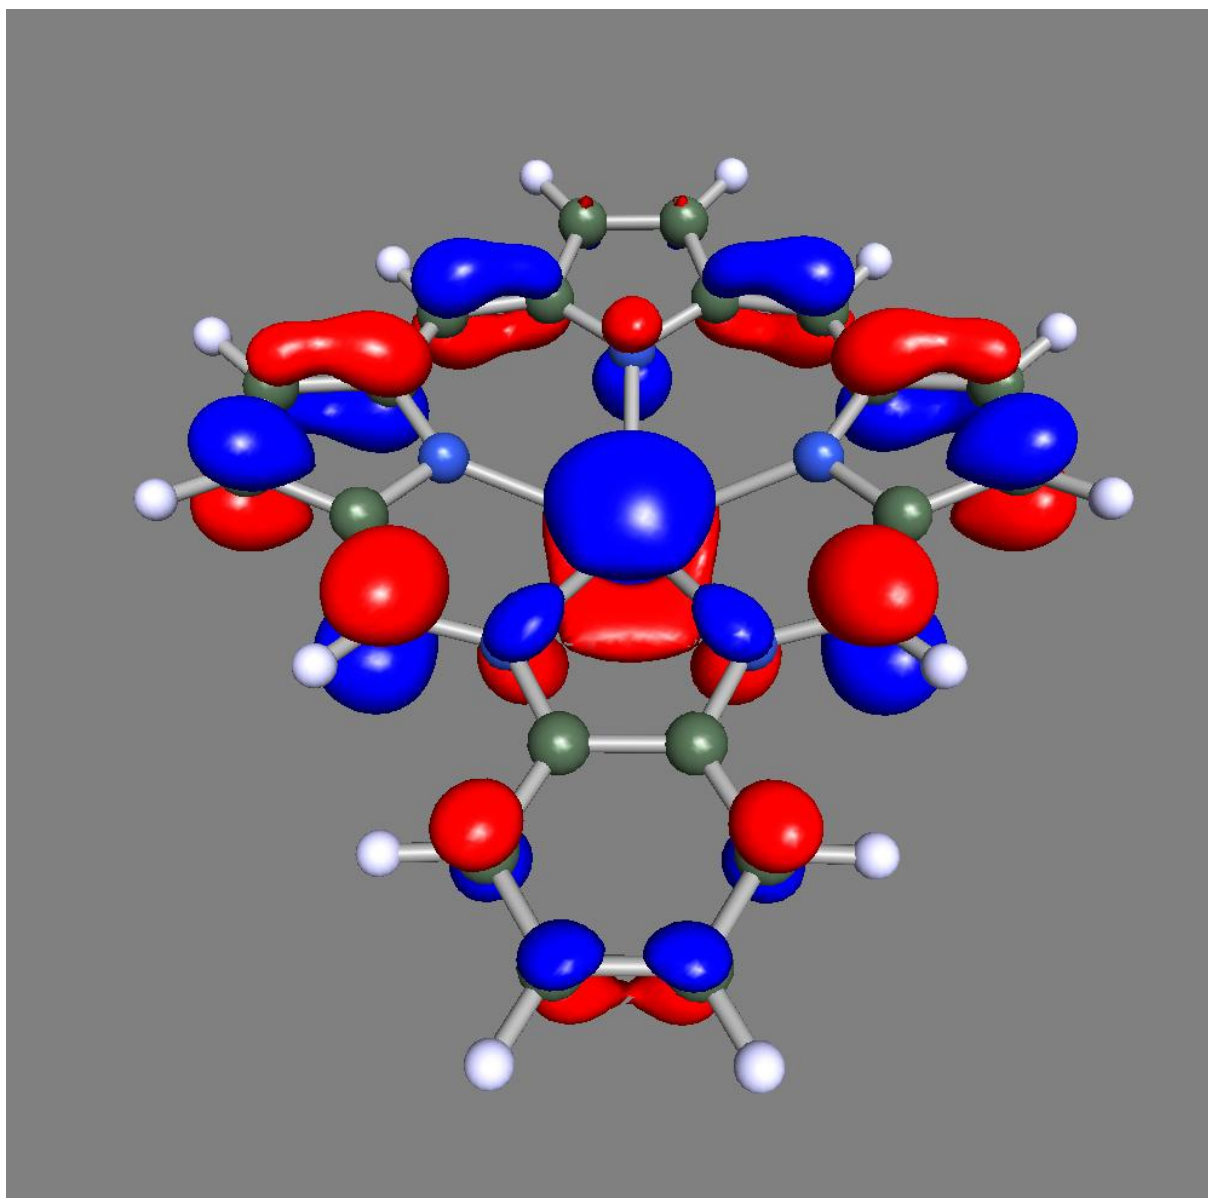

**Fig. S1h:**

**LUMO+2 of [La-Tex]<sup>2+</sup>**

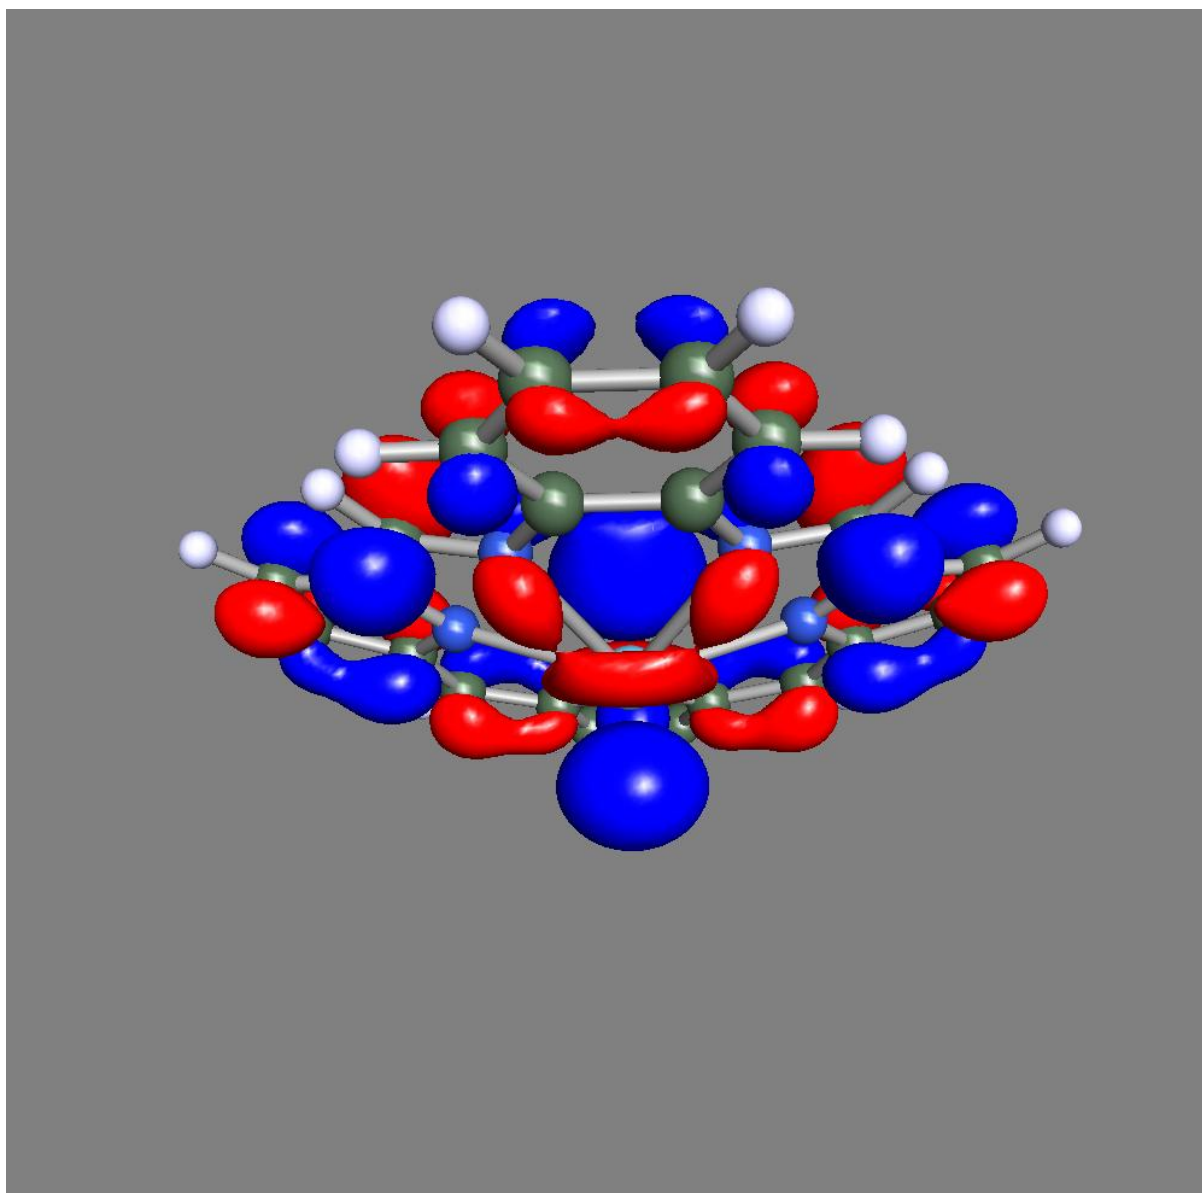

**Fig. S1i:**

**LUMO+2 of [La-Tex]<sup>2+</sup>**

Alternative view emphasizing the  $d_z^2$  character of the La atomic orbital contributing to the  $\pi$ -type molecular orbital.

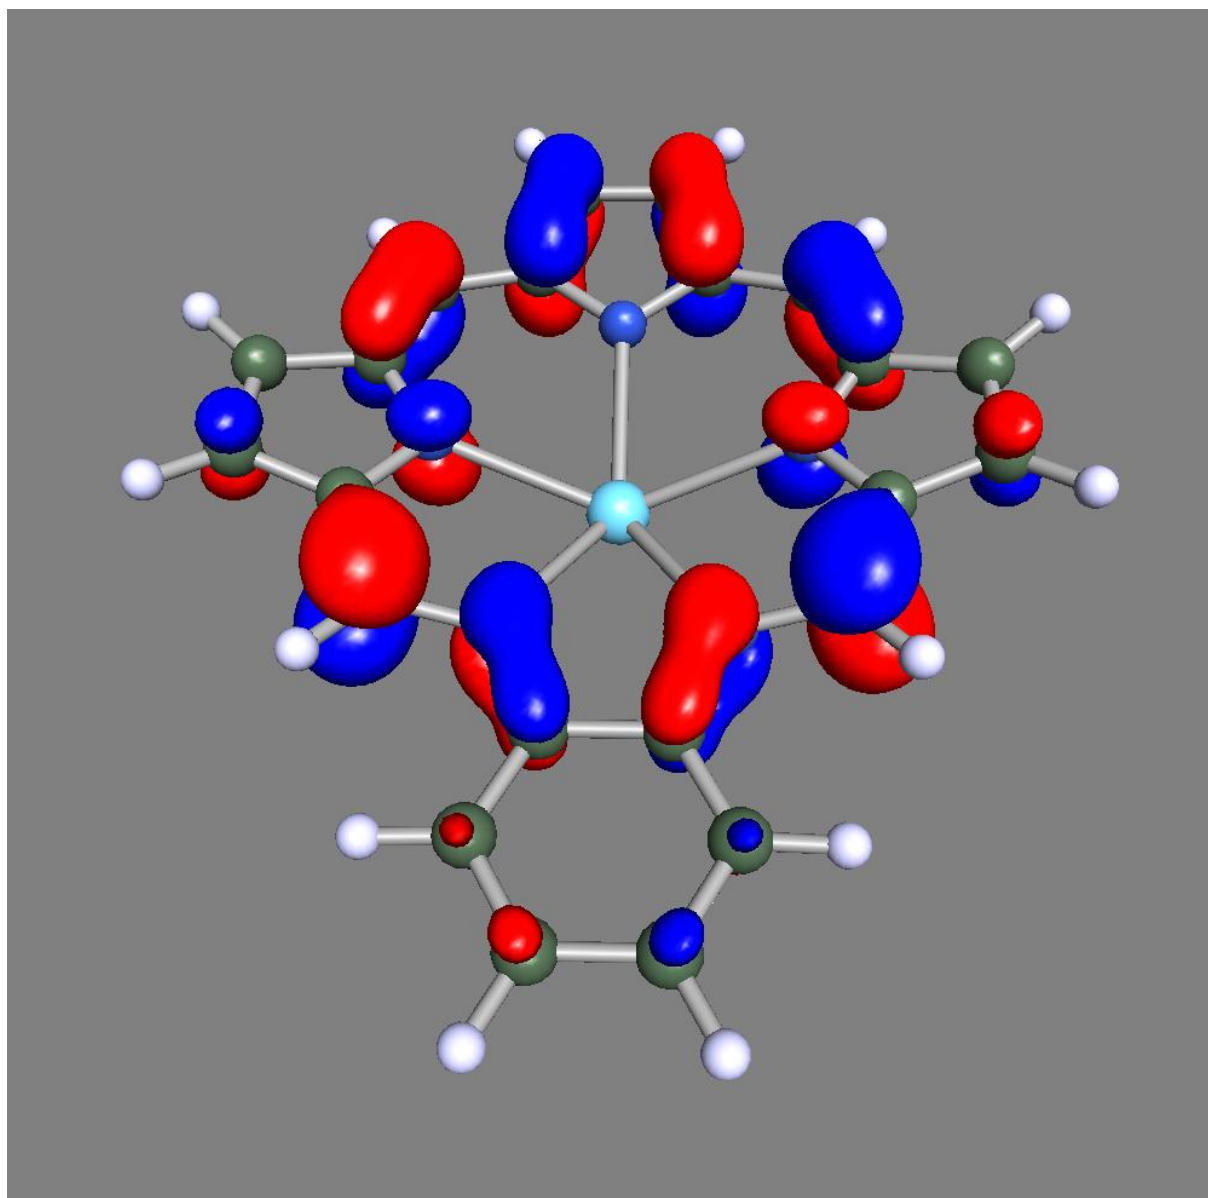

**Fig. S1j:**  
**LUMO+1 of [La-Tex]<sup>2+</sup>**

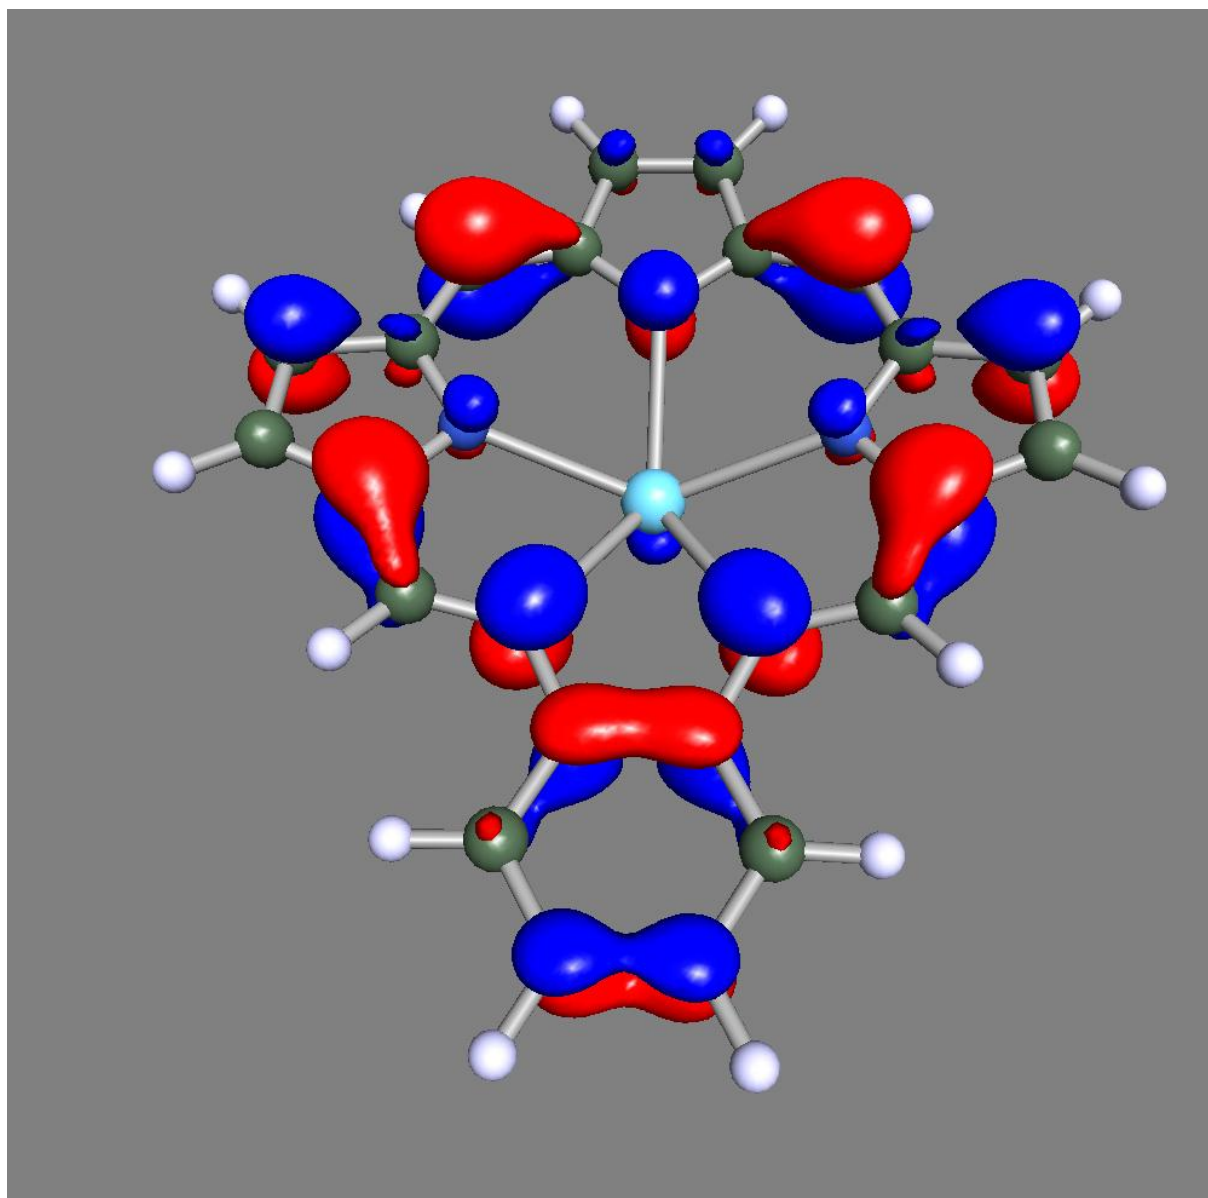

**Fig. S1k:**

**LUMO of [La-Tex]<sup>2+</sup>**

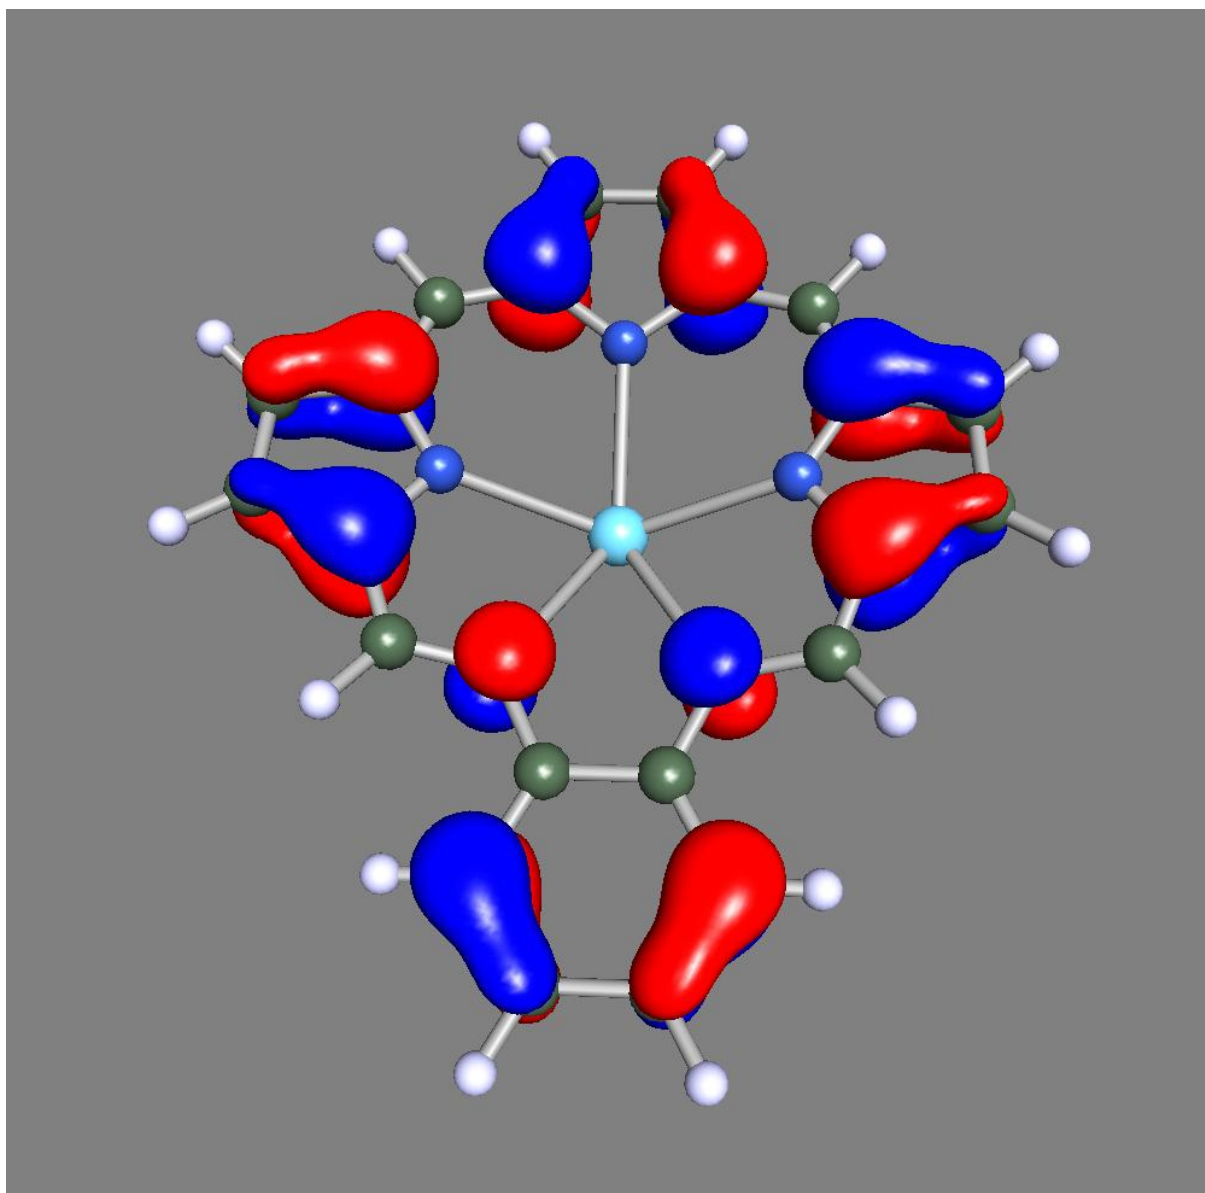

**Fig. S1l:**

**HOMO of [La-Tex]<sup>2+</sup>**

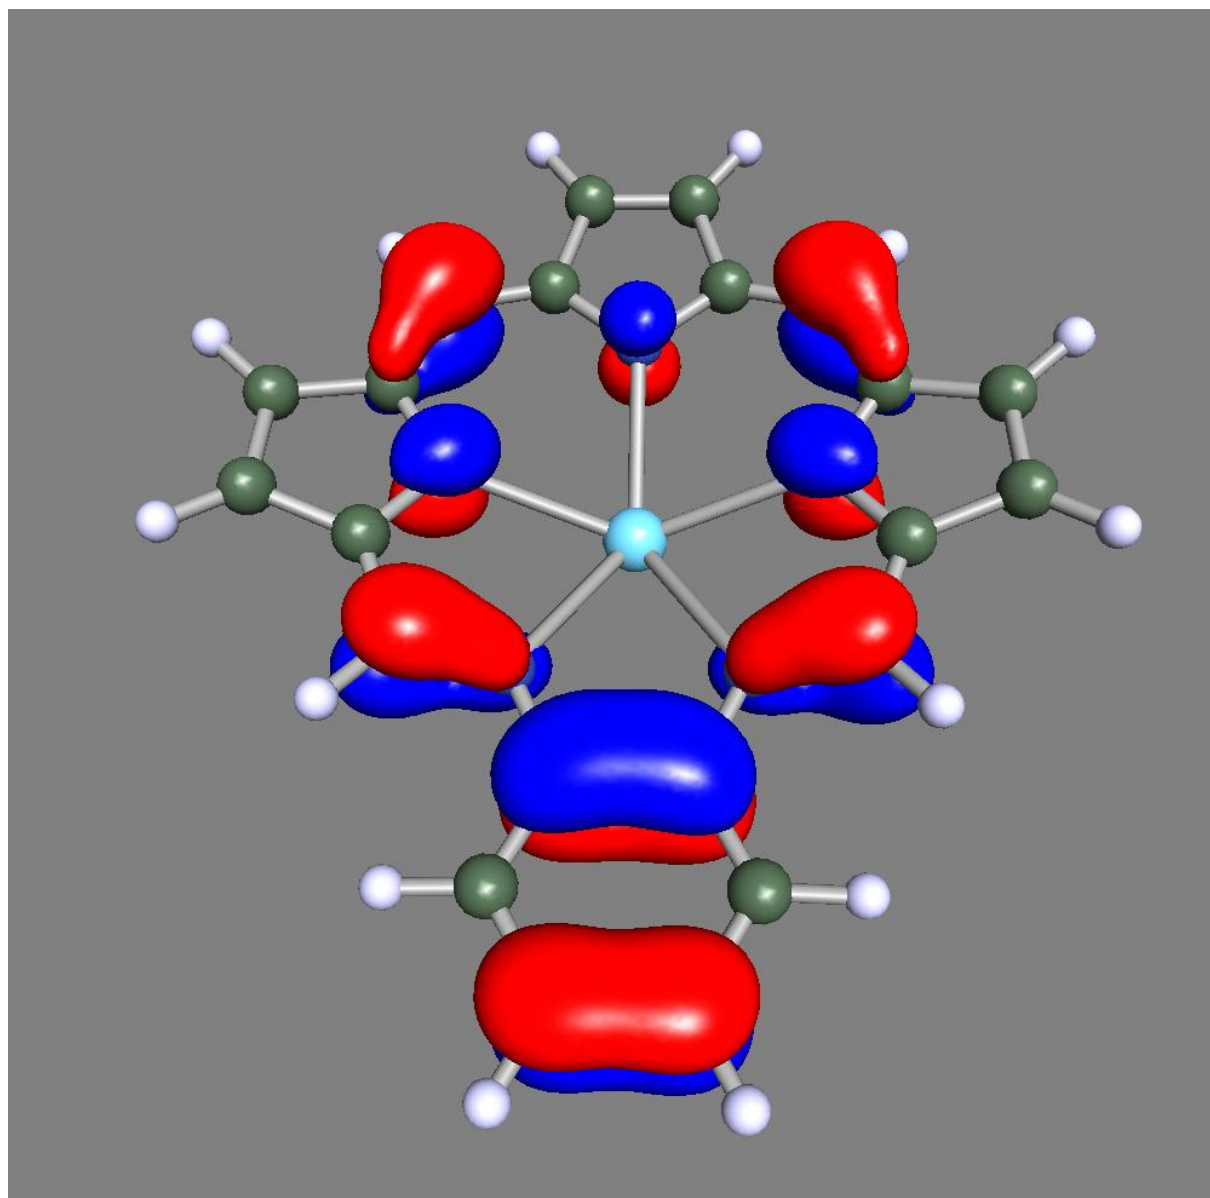

**Fig. S1m:**

**HOMO-1 of [La-Tex]<sup>2+</sup>**

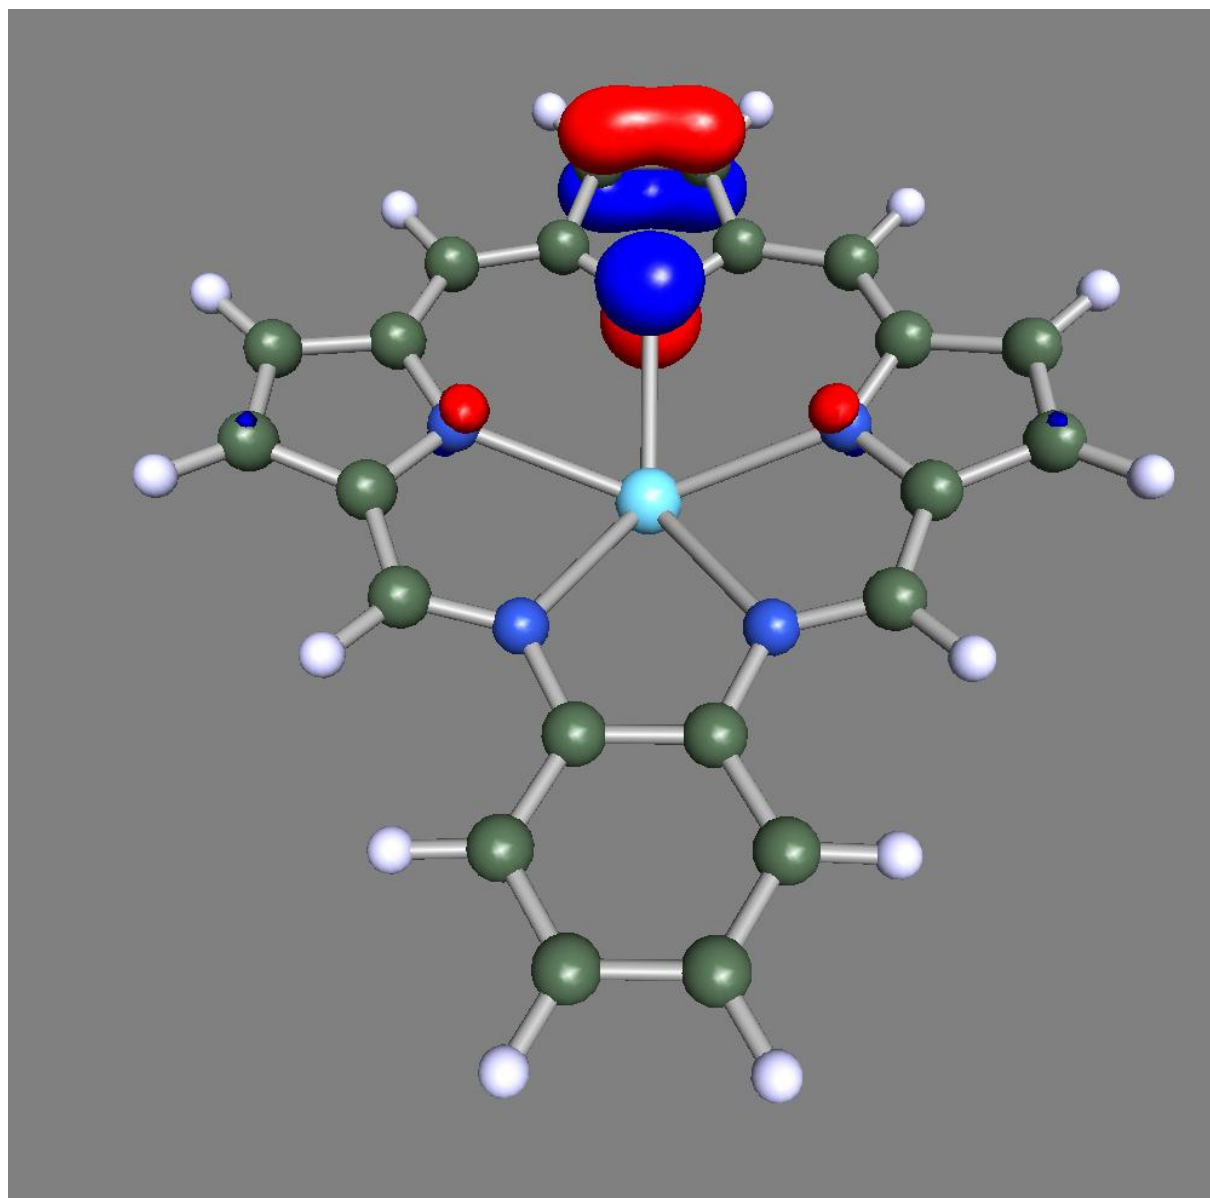

**Fig. S1n:**

**HOMO-2 of [La-Tex]<sup>2+</sup>**

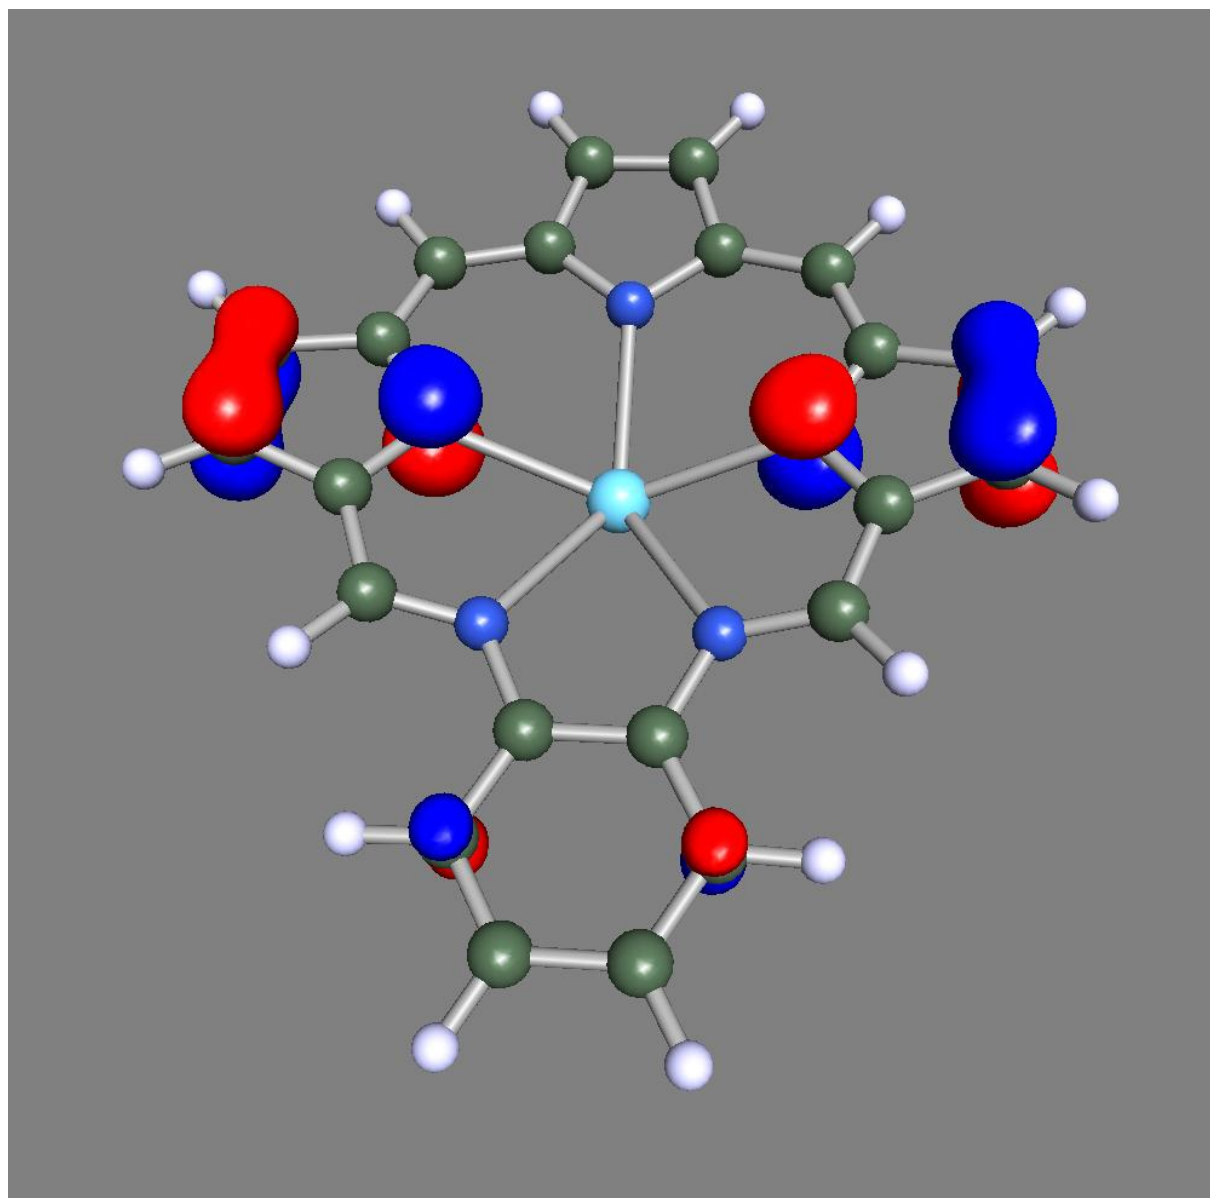

**Fig. S1o:**

**HOMO-3 of [La-Tex]<sup>2+</sup>**



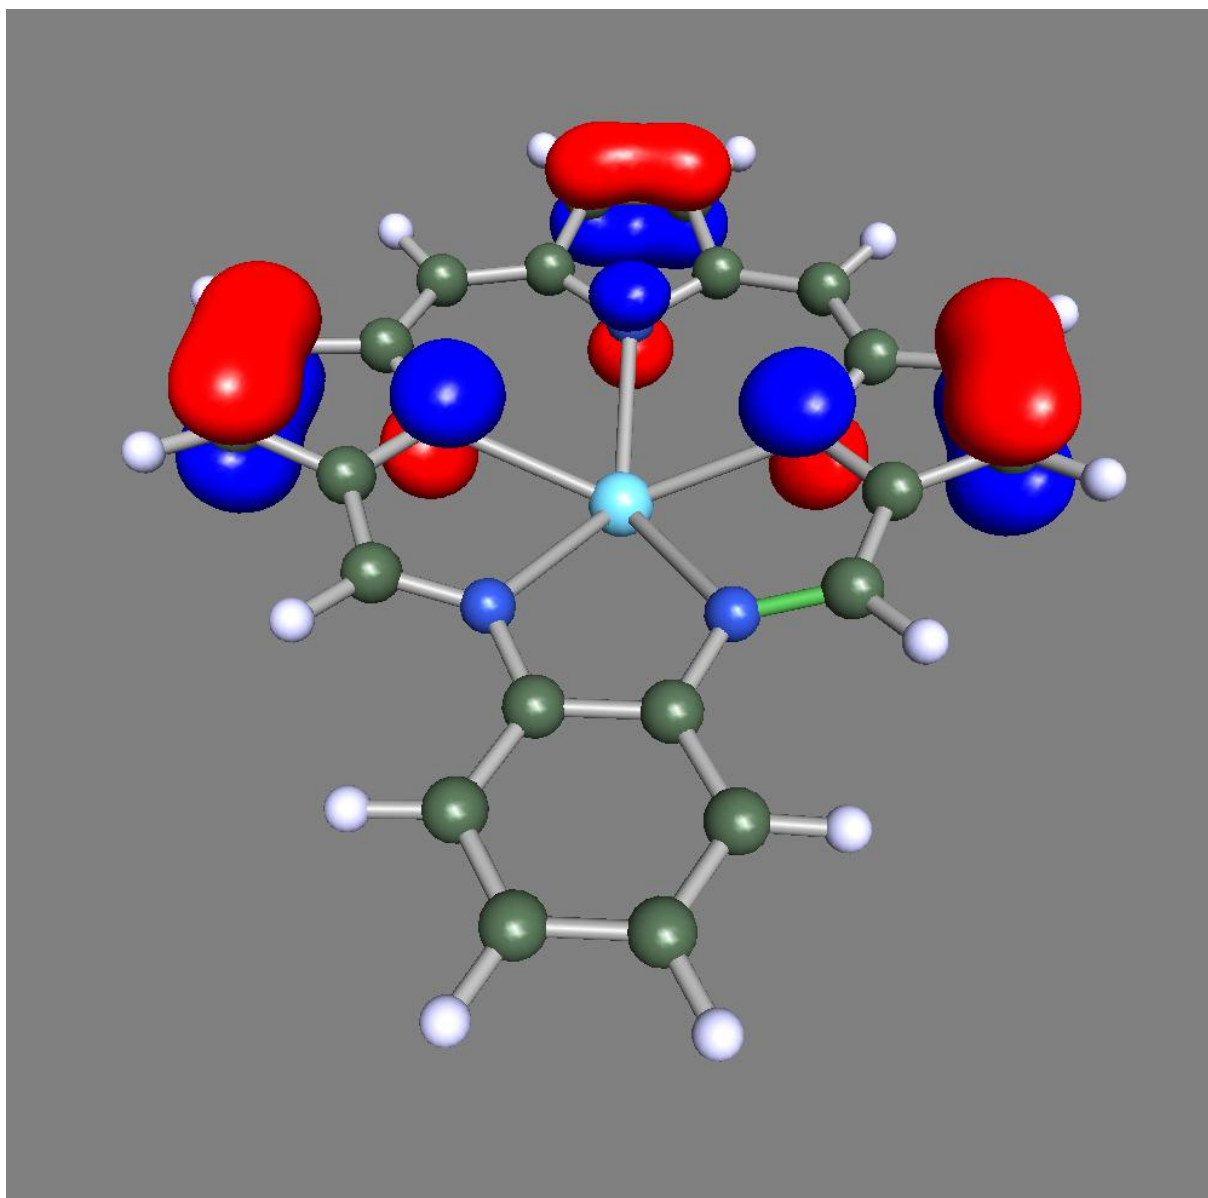

**Fig. S1p:**

**HOMO-4 of [La-Tex]<sup>2+</sup>**

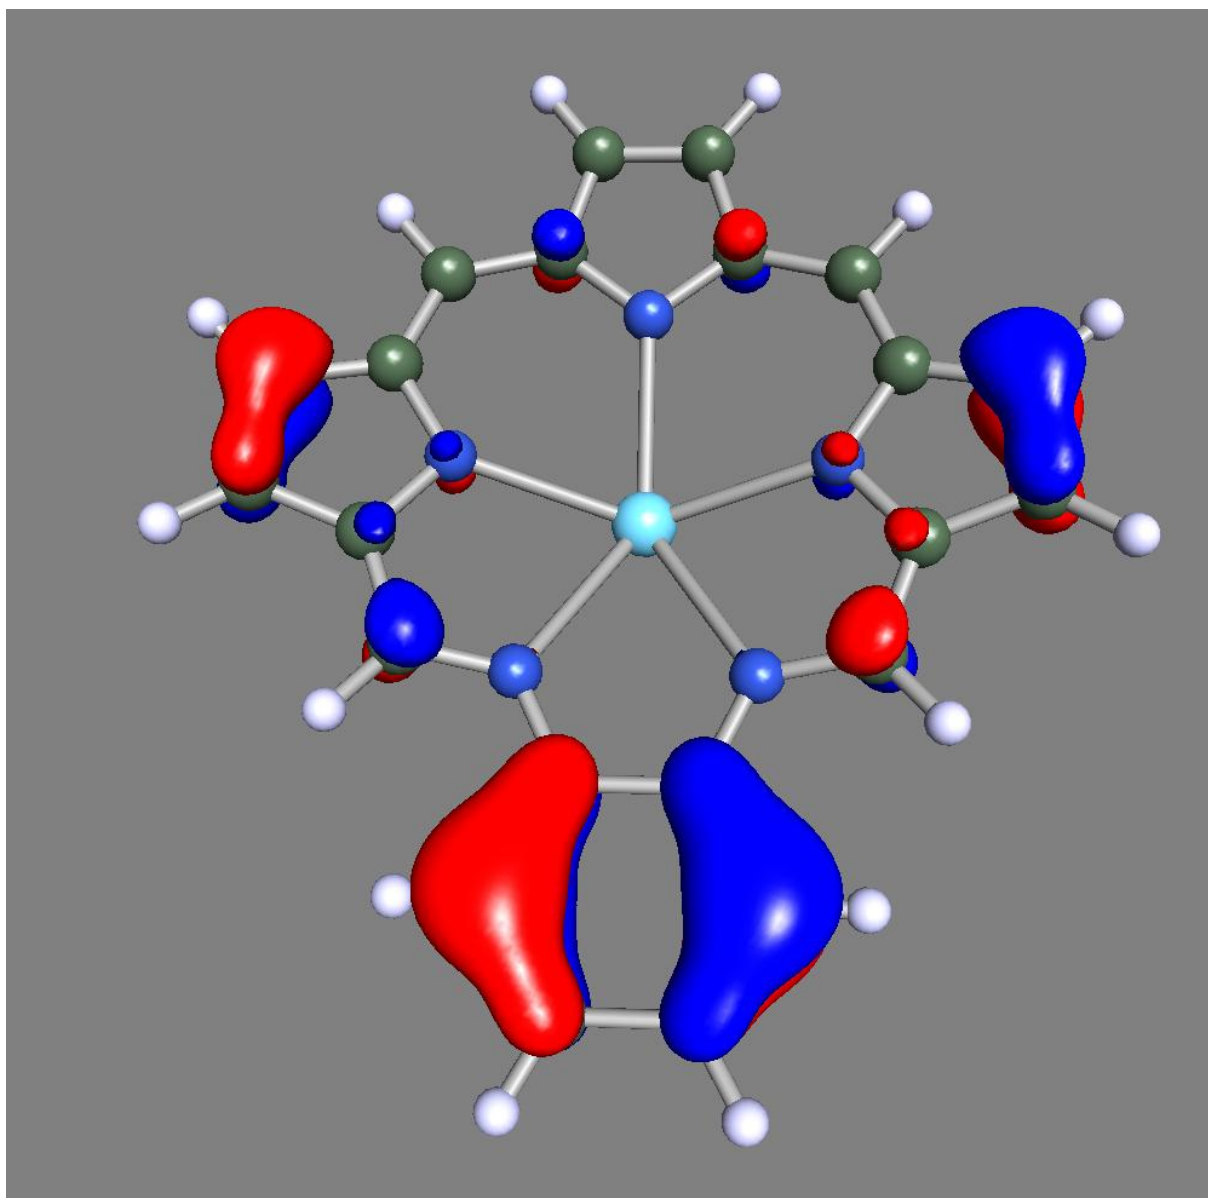

**Fig. S1q:**

**HOMO-5 of [La-Tex]<sup>2+</sup>**

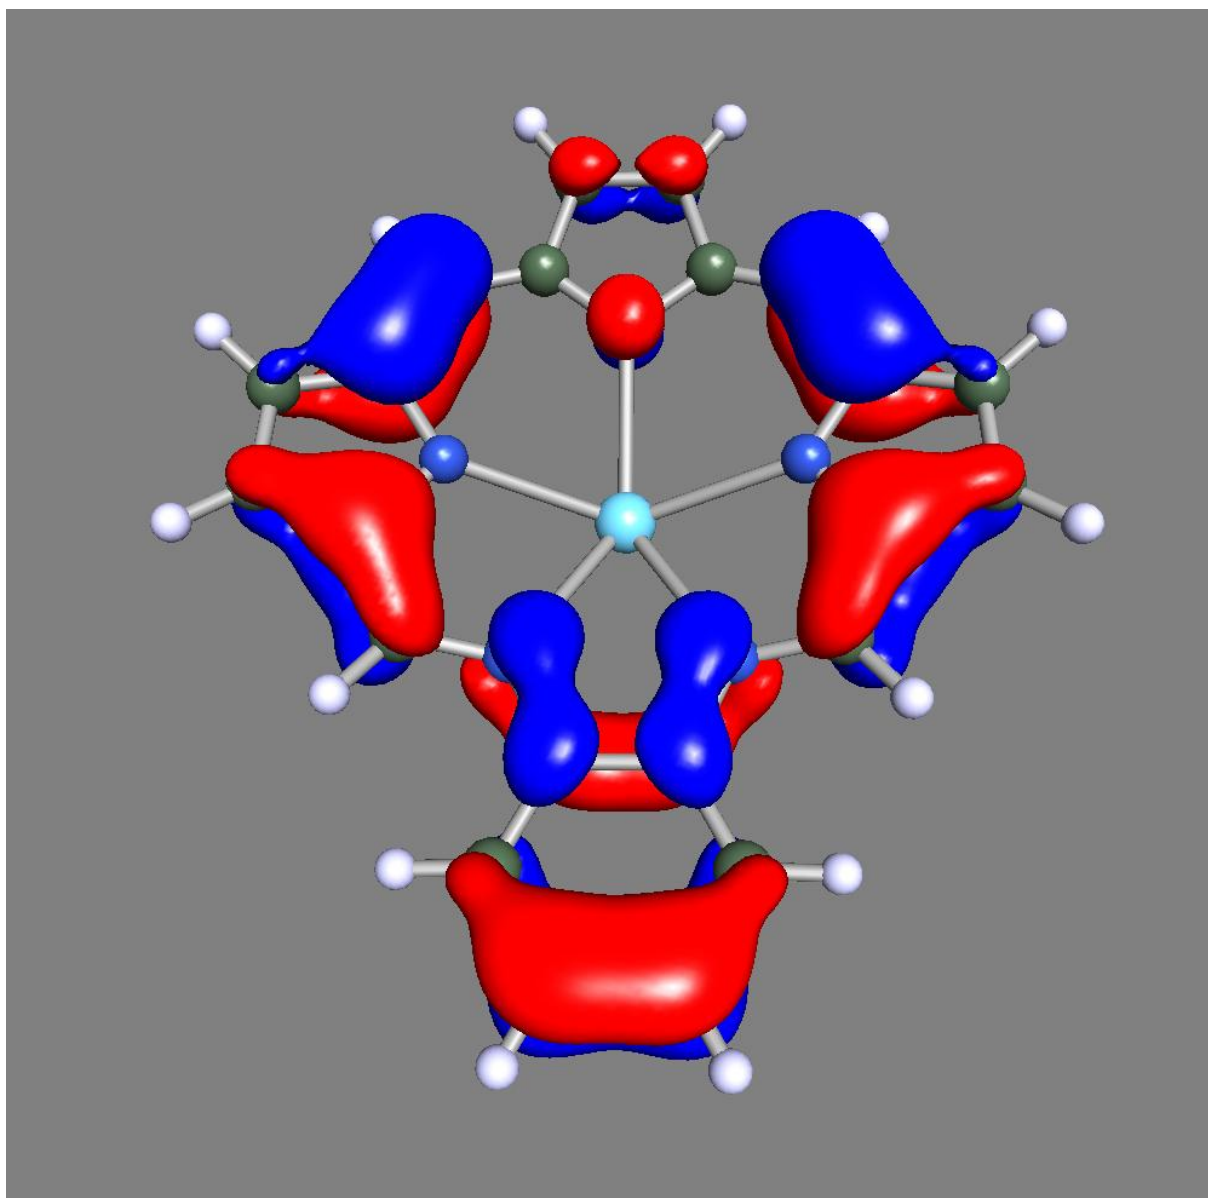

**Fig. S1r:**  
**HOMO-6 of [La-Tex]<sup>6+</sup>**

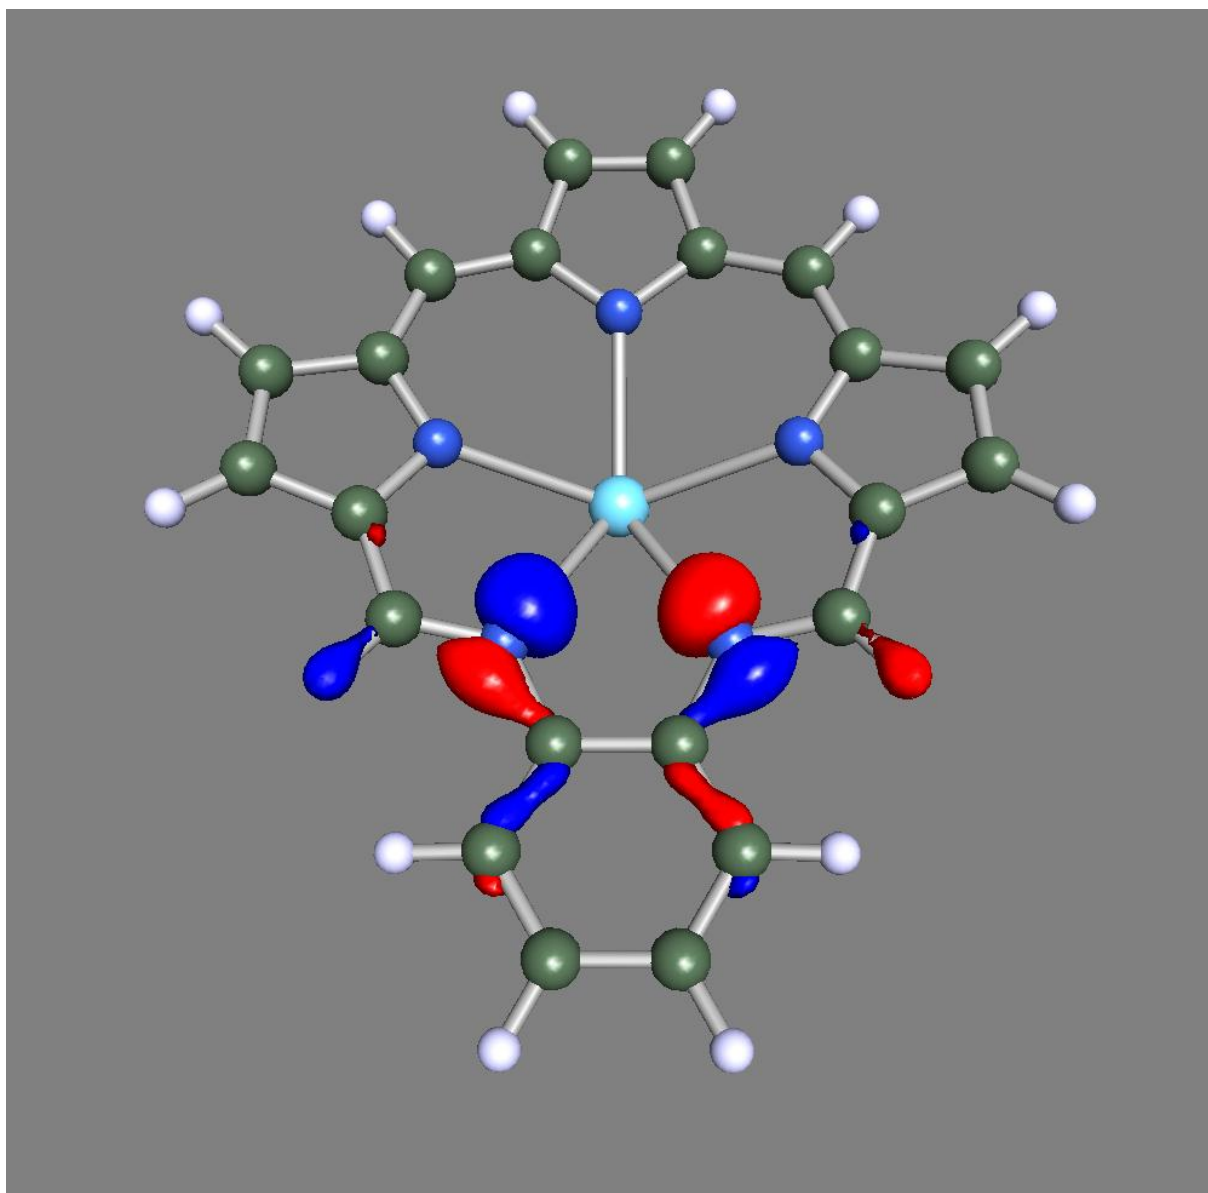

**Fig. S1s:**  
**HOMO-7 of [La-Tex]<sup>2+</sup>**

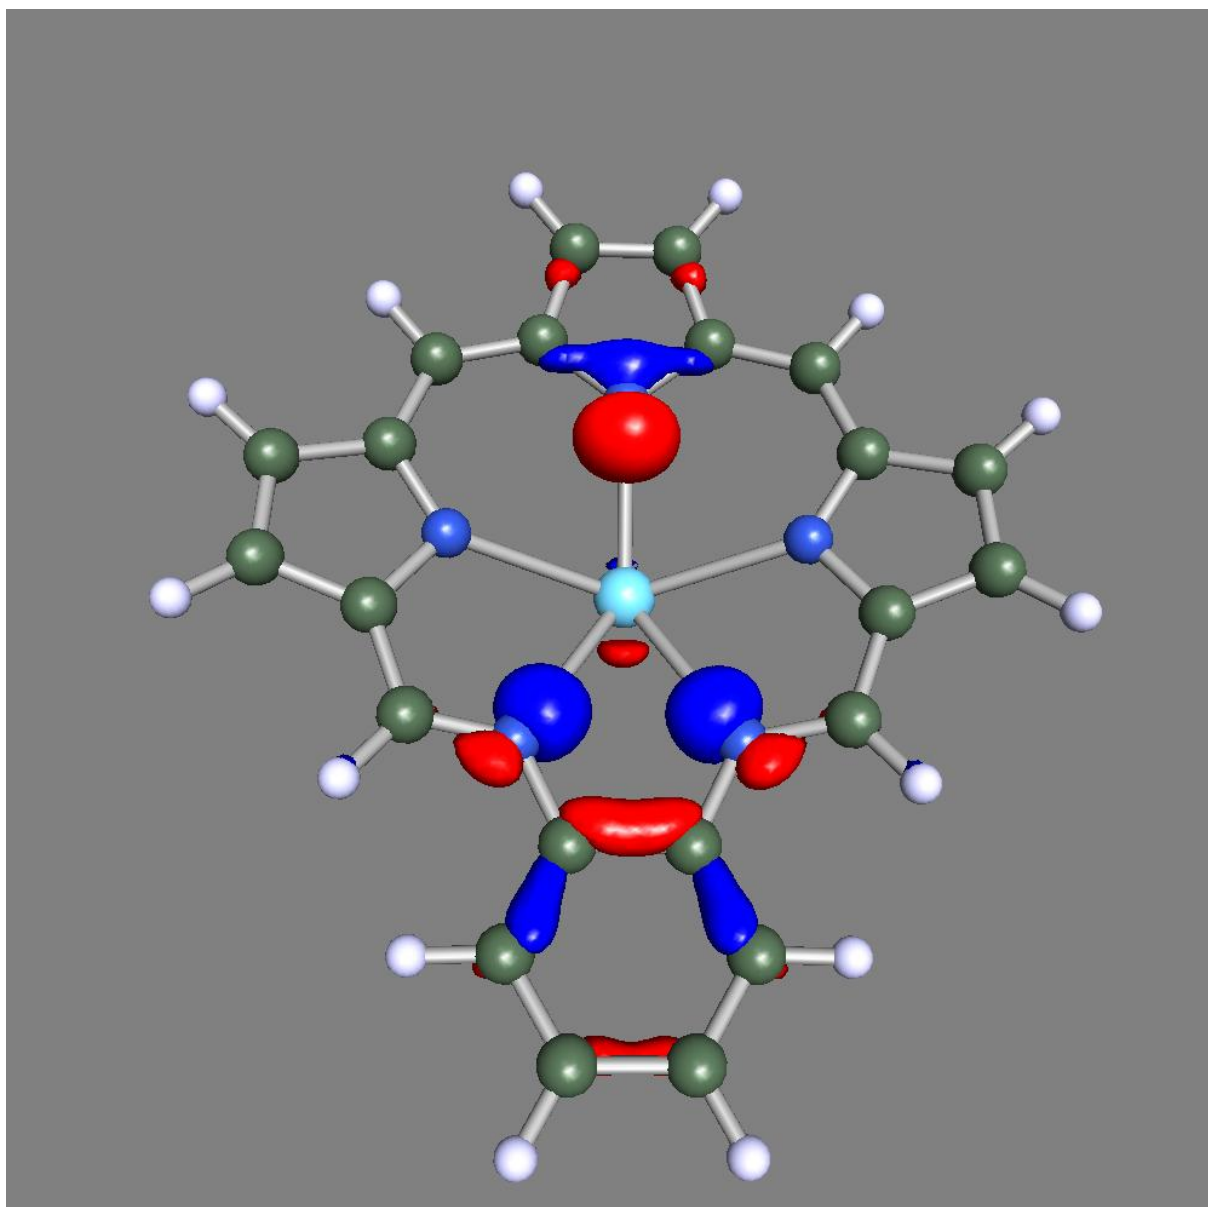

**Fig. S1t:**  
**HOMO-8 of [La-Tex]<sup>2+</sup>**

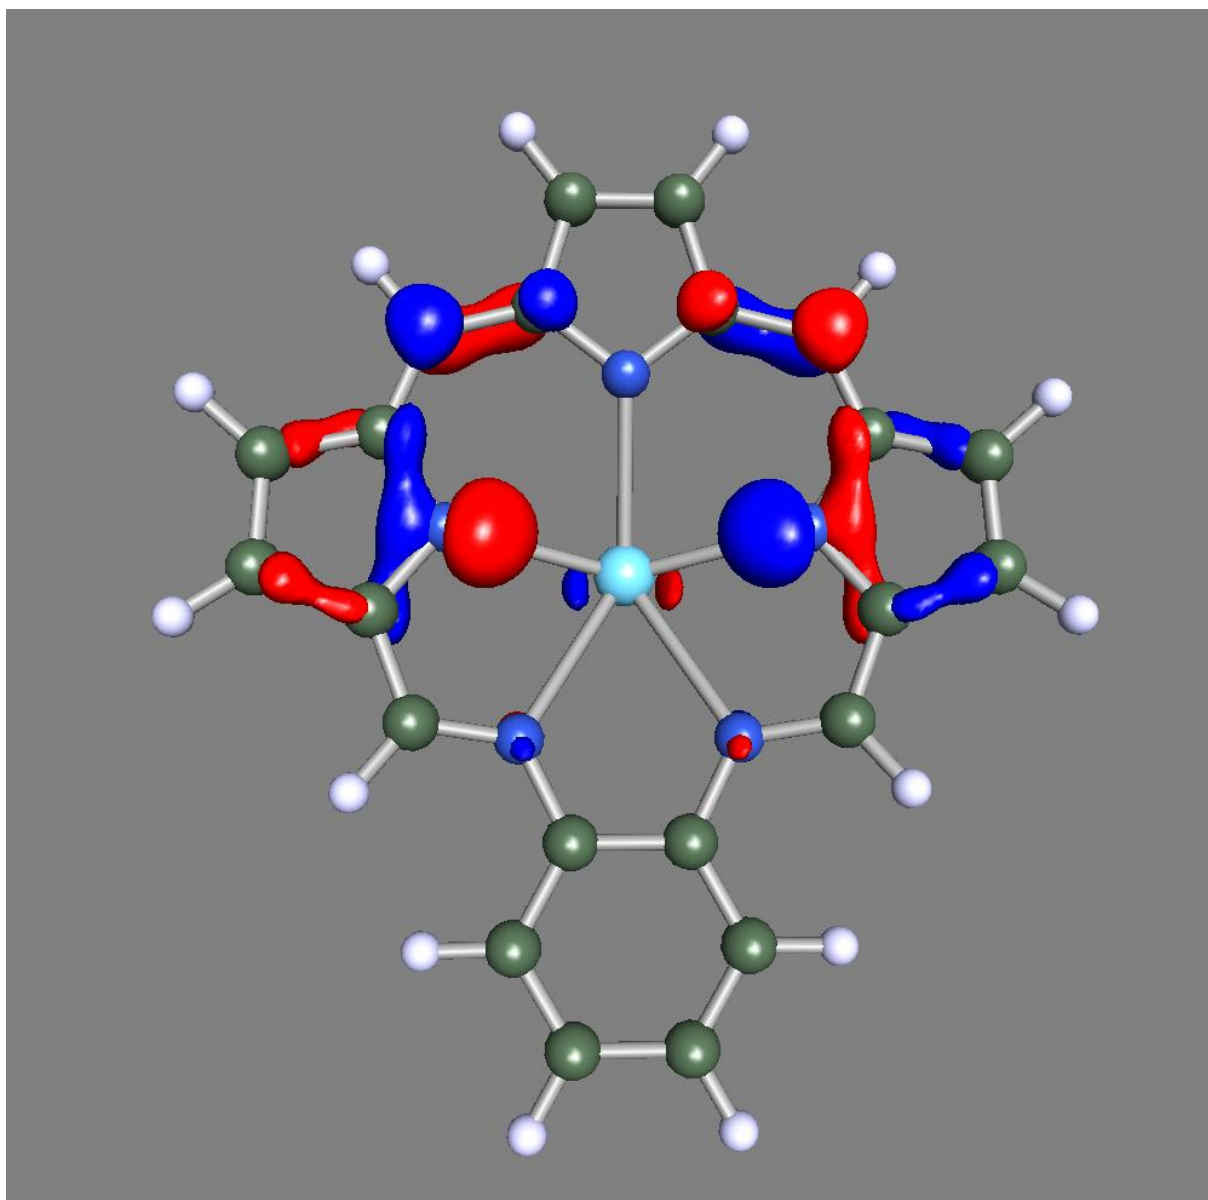

**Fig. S1u:**  
**HOMO-9 of [La-Tex]<sup>2+</sup>**

### I.d UV-Vis Absorption Spectra of $[\text{La-Tex}]^{2+}$

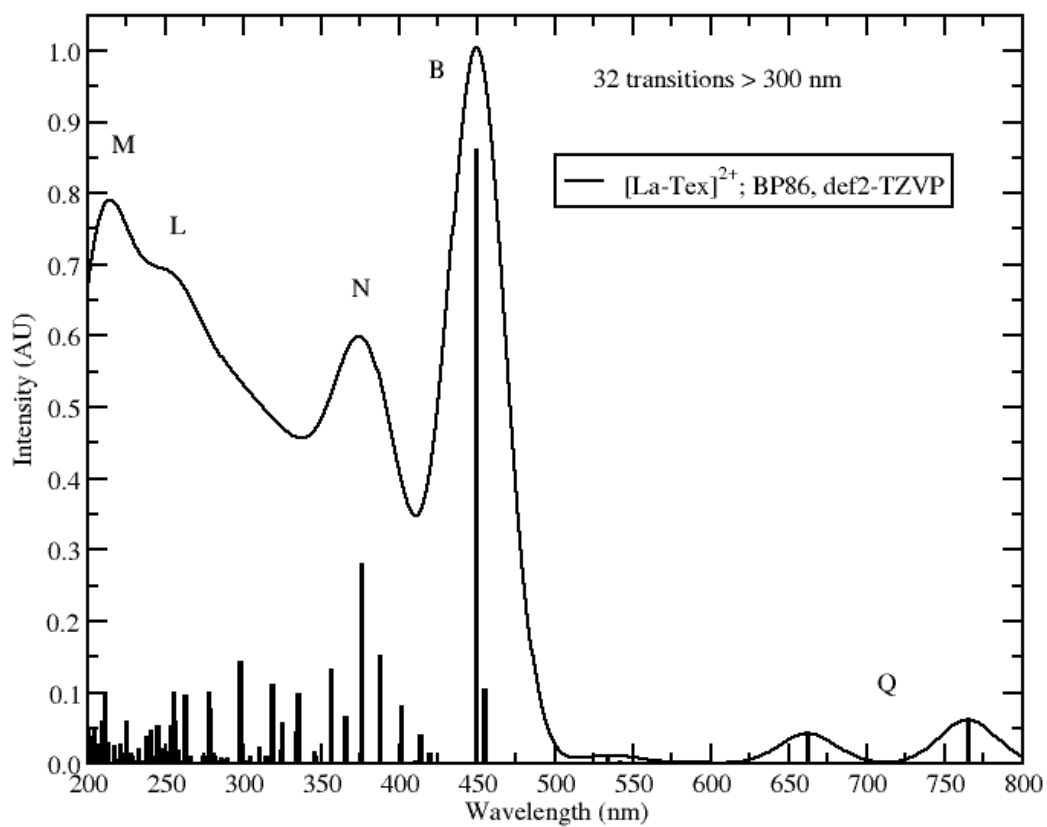

**Fig. S2a:**

**UV-Vis absorption spectrum of  $[\text{La-Tex}]^{2+}$  in gas phase calculated by TD-DFT (BP86, def2-TZVP).**

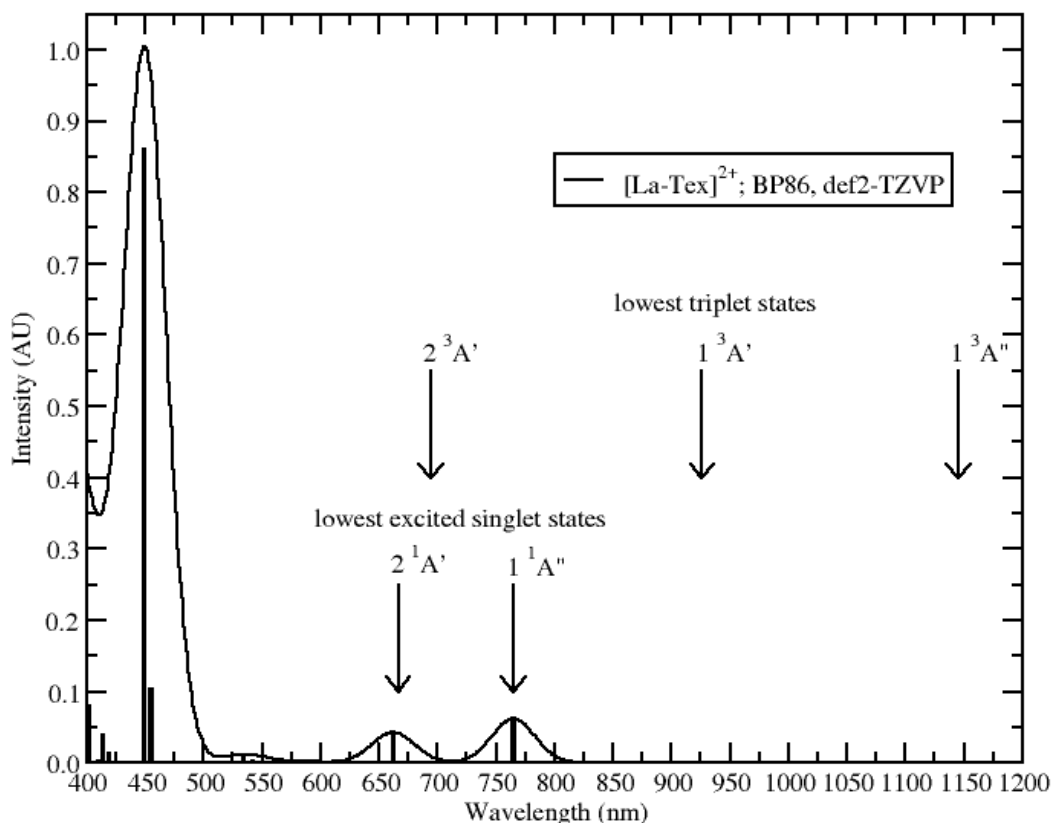

**Fig. S2b:**

**Lowest excited singlet and triplet states of [La-Tex]<sup>2+</sup> from TD-DFT gas phase calculations using the BP86 functional and def2-TZVP basis sets.**

Triplet states located below the lowest excited singlet state  $1\ ^1A''$  at a term energy of 1.620 eV (765 nm) are found at 1.082 eV (1146 nm,  $1\ ^3A''$ ) and 1.338 eV (927 nm,  $1\ ^3A'$ ) above the  $1\ ^1A'$  ground state (all term symbols for  $C_{2v}$  symmetry), i.e., below the high wavelength limit of the “therapeutic window” (near-infrared window) in biological tissue set by the excitation of  $O_2$  from the  $^3\Sigma_g^+$  ground state to the  $^1\Delta_g$  excited state at 0.977 eV (1269 nm). The low wavelength limit is given by the onset of significant absorption by hemoglobin ( $HbO_2$ , Hb) at around 650 nm and below.



**Table S1:**

**Summary of the 15 lowest singlet-singlet transitions for [La-Tex]<sup>2+</sup>  
from TD-DFT (BP86, def2-TZVP) calculations.**

| no. | excitation energy (nm) |             | oscillator strength  |             | excited state      |
|-----|------------------------|-------------|----------------------|-------------|--------------------|
|     | occ. MO                | Energy (eV) | virt. MO             | Energy (eV) | 100*coeff.^2       |
| 1   | 765.21                 |             | 0.44720377015216E-01 |             | 1 <sup>1</sup> A'' |
|     | HOMO                   | -11.77      | LUMO                 | -10.50      | 90.1               |
| 2   | 662.51                 |             | 0.30994047368661E-01 |             | 1 <sup>1</sup> A'  |
|     | HOMO-1                 | -12.05      | LUMO                 | -10.50      | 68.6               |
|     | HOMO                   | -11.77      | LUMO+1               | -9.76       | 27.5               |
| 3   | 606.95                 |             | 0.26484985771929E-04 |             | 2 <sup>1</sup> A'  |
|     | HOMO-2                 | -12.40      | LUMO                 | -10.50      | 96.3               |
| 4   | 584.31                 |             | 0.13464541898481E-02 |             | 2 <sup>1</sup> A'' |
|     | HOMO-3                 | -12.52      | LUMO                 | -10.50      | 96.5               |
| 5   | 541.95                 |             | 0.17340800088197E-02 |             | 3 <sup>1</sup> A'  |
|     | HOMO-4                 | -11.68      | LUMO                 | -10.50      | 88.3               |
|     | HOMO                   | -11.77      | LUMO+1               | -9.76       | 7.7                |
| 6   | 534.25                 |             | 0.70291845293752E-02 |             | 3 <sup>1</sup> A'' |
|     | HOMO-5                 | -12.69      | LUMO                 | -10.50      | 81.6               |
|     | HOMO-1                 | -12.05      | LUMO+1               | -9.76       | 13.8               |
| 7   | 455.31                 |             | 0.79612345453637E-01 |             | 4 <sup>1</sup> A'' |
|     | HOMO-1                 | -12.05      | LUMO+1               | -9.76       | 40.8               |
|     | HOMO                   | -11.77      | LUMO+2               | -8.92       | 26.0               |
|     | HOMO-2                 | -12.40      | LUMO+1               | -9.76       | 22.1               |
|     | HOMO-5                 | -12.69      | LUMO                 | -10.50      | 4.6                |
| 8   | 449.86                 |             | 0.61991505830949E+00 |             | 4 <sup>1</sup> A'  |

|    |        |        |                      |        |                    |
|----|--------|--------|----------------------|--------|--------------------|
|    | HOMO   | -11.77 | LUMO+1               | -9.76  | 48.5               |
|    | HOMO-1 | -12.05 | LUMO                 | -10.50 | 21.7               |
|    | HOMO-6 | -13.32 | LUMO                 | -10.50 | 8.3                |
|    | HOMO-4 | -12.68 | LUMO                 | -10.50 | 7.0                |
|    | HOMO-3 | -12.52 | LUMO+1               | -9.76  | 5.3                |
| 9  | 449.29 |        | 0.18435112046824E-01 |        | 5 <sup>1</sup> A'' |
|    | HOMO-2 | -12.40 | LUMO+1               | -9.76  | 75.3               |
|    | HOMO-1 | -12.05 | LUMO+1               | -9.76  | 17.0               |
| 10 | 419.52 |        | 0.70381602626991E-02 |        | 5 <sup>1</sup> A'  |
|    | HOMO-3 | -12.52 | LUMO+1               | -9.76  | 80.0               |
|    | HOMO-6 | -13.32 | LUMO                 | -10.50 | 14.4               |
| 11 | 414.04 |        | 0.31463767405582E-01 |        | 6 <sup>1</sup> A'  |
|    | HOMO-5 | -12.69 | LUMO+1               | -9.76  | 46.3               |
|    | HOMO-6 | -13.32 | LUMO                 | -10.50 | 37.3               |
|    | HOMO-3 | -12.52 | LUMO+1               | -9.76  | 6.6                |
| 12 | 410.29 |        | 0.29482580877750E-02 |        | 6 <sup>1</sup> A'' |
|    | HOMO-4 | -12.68 | LUMO+1               | -9.76  | 75.3               |
|    | HOMO   | -11.77 | LUMO+2               | -8.92  | 18.7               |
| 13 | 401.69 |        | 0.58522332684448E-01 |        | 7 <sup>1</sup> A'  |
|    | HOMO-1 | -12.05 | LUMO+2               | -8.92  | 47.5               |
|    | HOMO-5 | -12.69 | LUMO+1               | -9.76  | 35.4               |
|    | HOMO-6 | -13.32 | LUMO                 | -10.50 | 8.8                |
| 14 | 388.51 |        | 0.10958399733025E+00 |        | 7 <sup>1</sup> A'' |
|    | HOMO-7 | -13.68 | LUMO                 | -10.50 | 55.8               |
|    | HOMO   | -11.77 | LUMO+2               | -8.92  | 19.1               |
|    | HOMO-4 | -12.68 | LUMO+1               | -9.76  | 10.8               |
|    | HOMO-1 | -12.05 | LUMO+1               | -9.76  | 4.9                |
| 15 | 376.34 |        | 0.19762505142552E+00 |        | 8 <sup>1</sup> A'' |
|    | HOMO-7 | -13.68 | LUMO                 | -10.50 | 40.4               |
|    | HOMO   | -11.77 | LUMO+2               | -8.92  | 17.5               |
|    | HOMO-4 | -12.68 | LUMO+1               | -9.76  | 8.2                |
|    | HOMO-1 | -12.05 | LUMO+1               | -9.76  | 7.6                |
|    | HOMO   | -11.77 | LUMO+4               | -8.41  | 7.4                |
|    | HOMO-6 | -13.32 | LUMO+1               | -9.76  | 4.5                |
|    | HOMO-5 | -12.69 | LUMO                 | -10.50 | 3.6                |
|    | HOMO-9 | -14.02 | LUMO                 | -10.50 | 2.6                |

**Table S2:**

**Summary of the 2 lowest (spin-forbidden) singlet-triplet transitions  
for [La-Tex]<sup>2+</sup> from TD-DFT (BP86, def2-TZVP) calculations.**

| no. | excitation energy (nm) |             | excited state      |             |              |
|-----|------------------------|-------------|--------------------|-------------|--------------|
|     | occ. MO                | Energy (eV) | virt. MO           | Energy (eV) | 100*coeff.^2 |
| 1   | 1146.09                |             | 1 <sup>3</sup> A'' |             |              |
|     | HOMO                   | -11.77      | LUMO               | -10.50      | 99.1         |
| 2   | 926.94                 |             | 1 <sup>3</sup> A'  |             |              |
|     | HOMO-1                 | -12.05      | LUMO               | -10.50      | 98.8         |

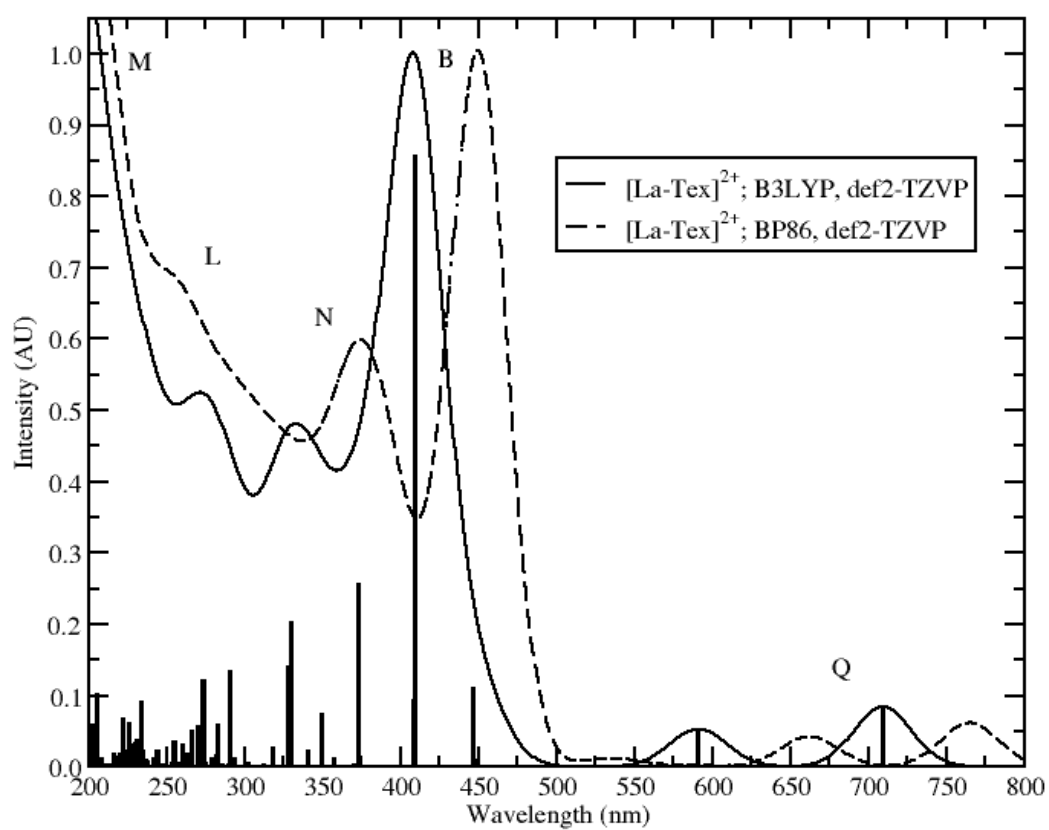

**Fig. S3a:**  
UV-Vis absorption spectrum of [La-Tex]<sup>2+</sup> calculated by TD-DFT (B3LYP and BP86, def2-TZVP).

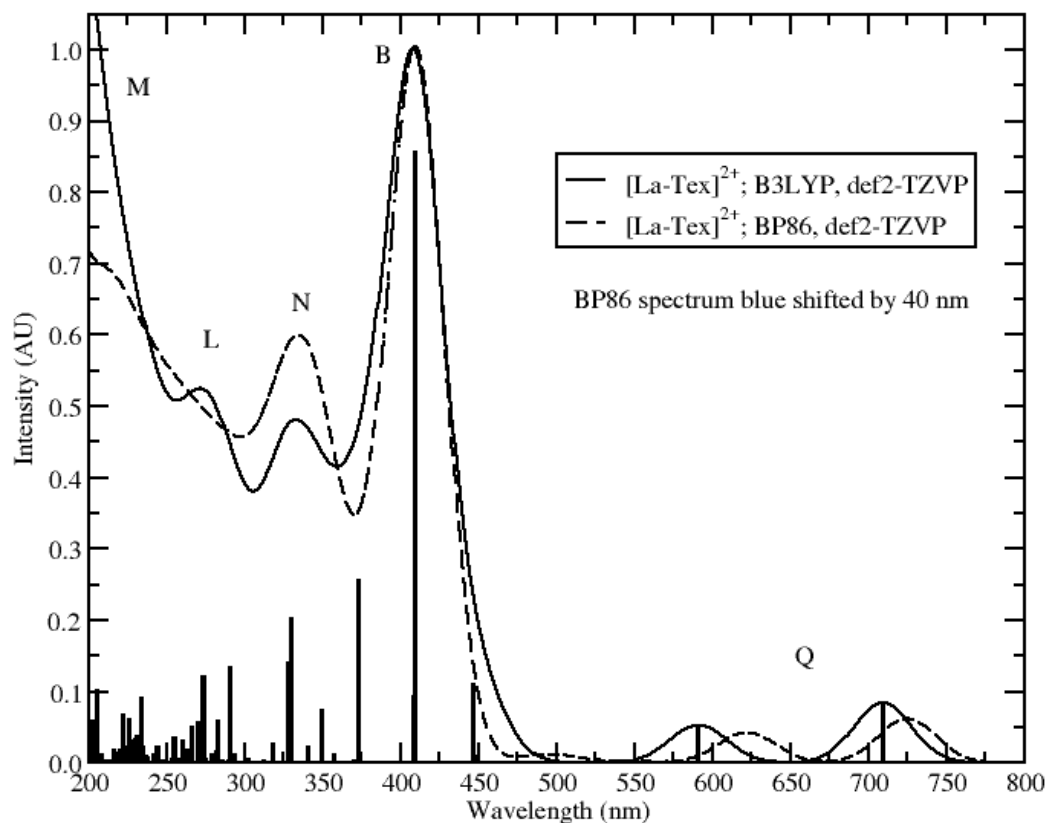

**Fig. S3b:**  
**UV-Vis absorption spectrum of  $[\text{La-Tex}]^{2+}$  calculated by TD-DFT (B3LYP and BP86, def2-TZVP).**

The BP86 spectrum was shifted to shorter wavelengths by 40 nm in order to have the B-bands at nearly the same position.

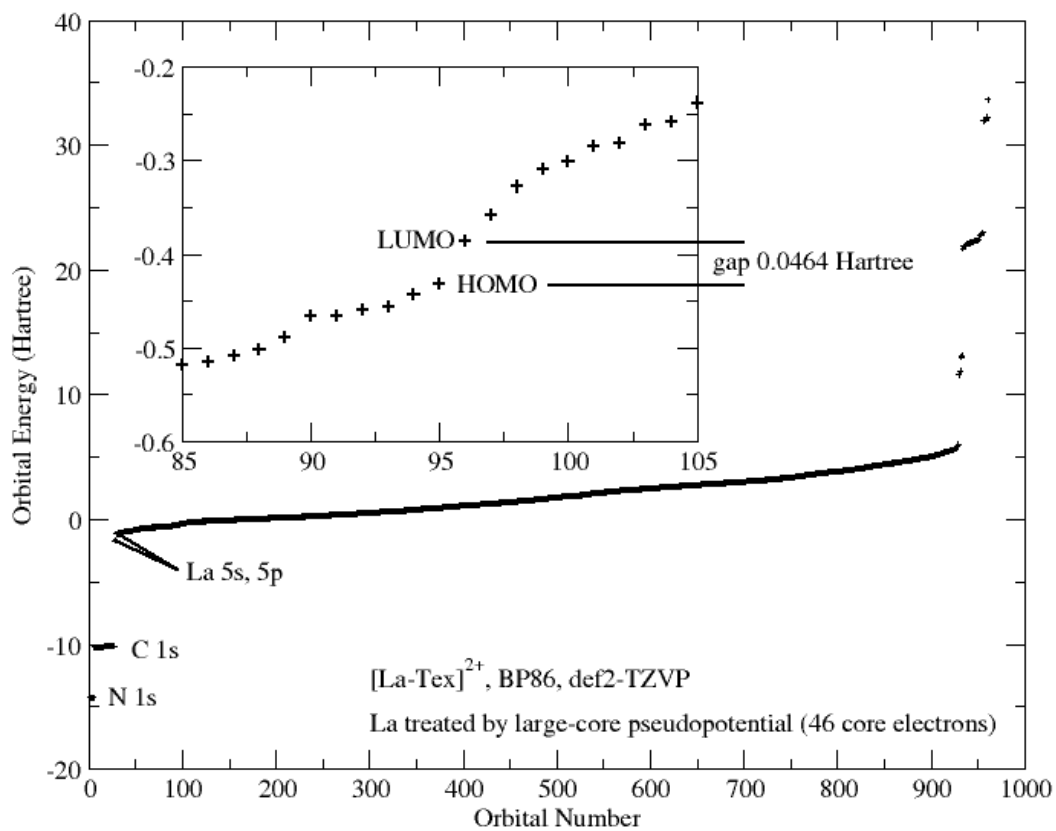

**Fig. S4a:**  
**Orbital energies from BP86 calculations of  $[\text{La-Tex}]^{2+}$ .**

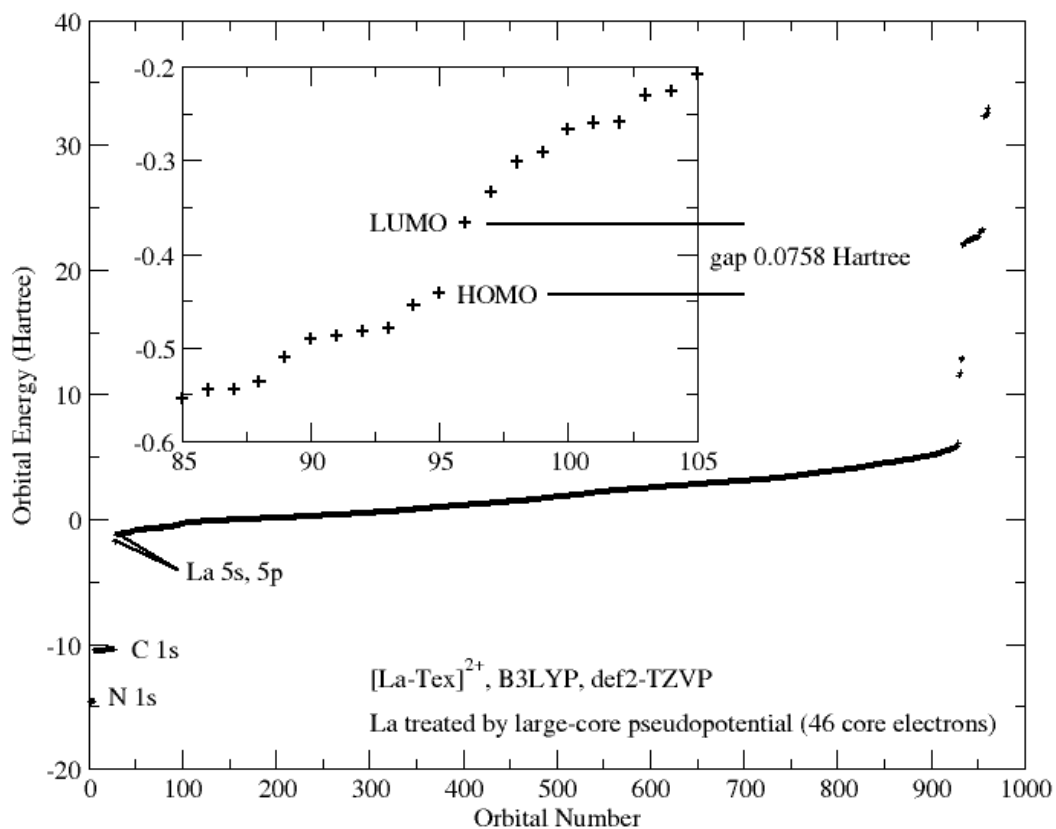

**Fig. S4b:**

**Orbital energies from B3LYP calculations of  $[\text{La-Tex}]^{2+}$ .**

The HOMO-LUMO gap as well as the spread of the orbital energies (e.g. between no. 85 und 105) is significantly larger for B3LYP than for BP86, (cf. Figure S4a) leading to a blue shift of the B3LYP spectrum with respect to the BP86 one (cf. Figure S3b).

I.e UV-Vis Absorption Spectra of  $[M\text{-Por}]^{n+}$  ( $M=\text{Mg},n=0$ ;  
 $M=\text{La},n=1$ ) and  $[M\text{-Tex}]^{n+}$  ( $M=\text{Mg},n=1$ ;  $M=\text{La},n=2$ )

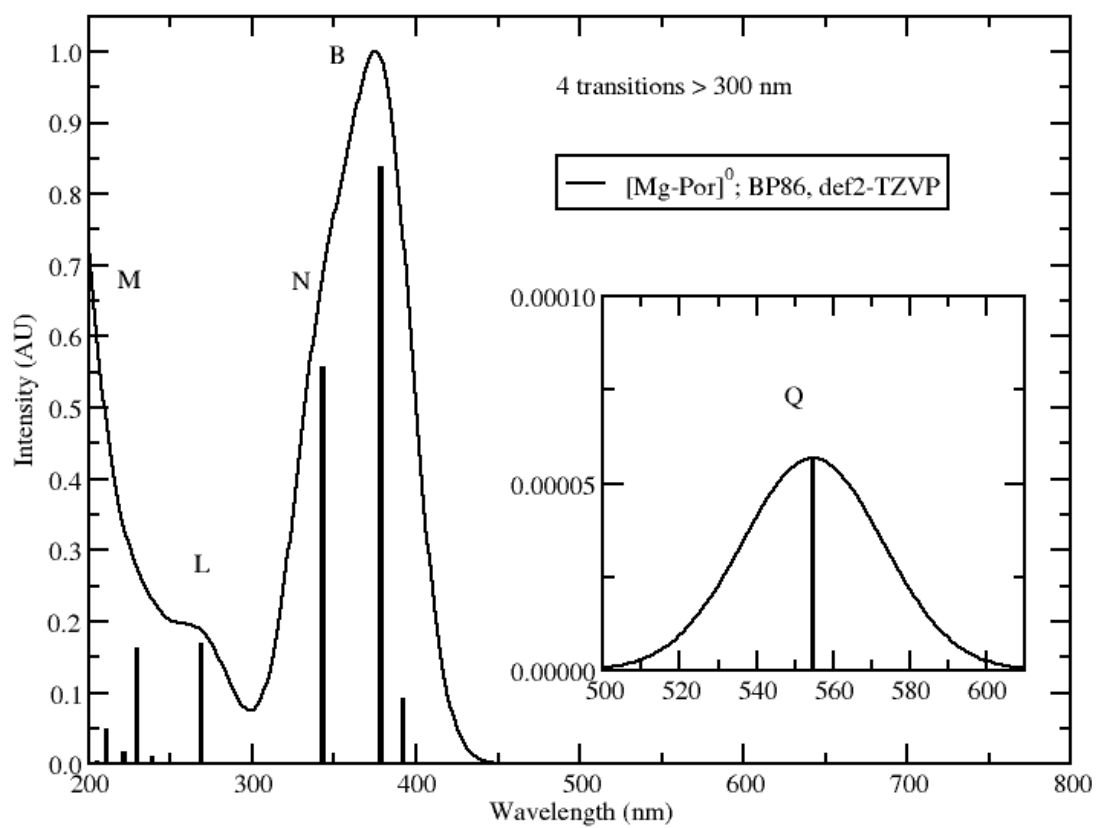

**Fig. S5a:**  
TD-DFT/BP86 UV-Vis absorption spectrum of  $[\text{Mg-Por}]^0$ .



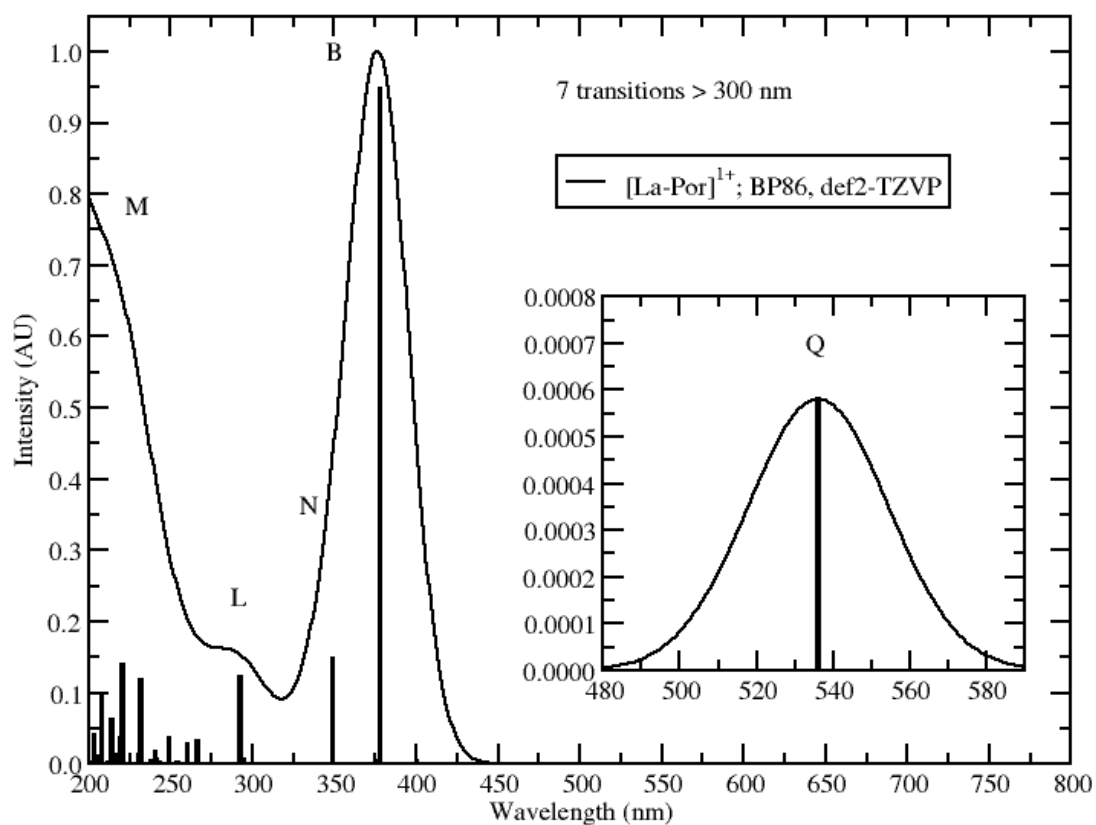

**Fig. S5b:**  
TD-DFT/BP86 UV-Vis absorption spectrum of  $[\text{La-Por}]^{1+}$ .

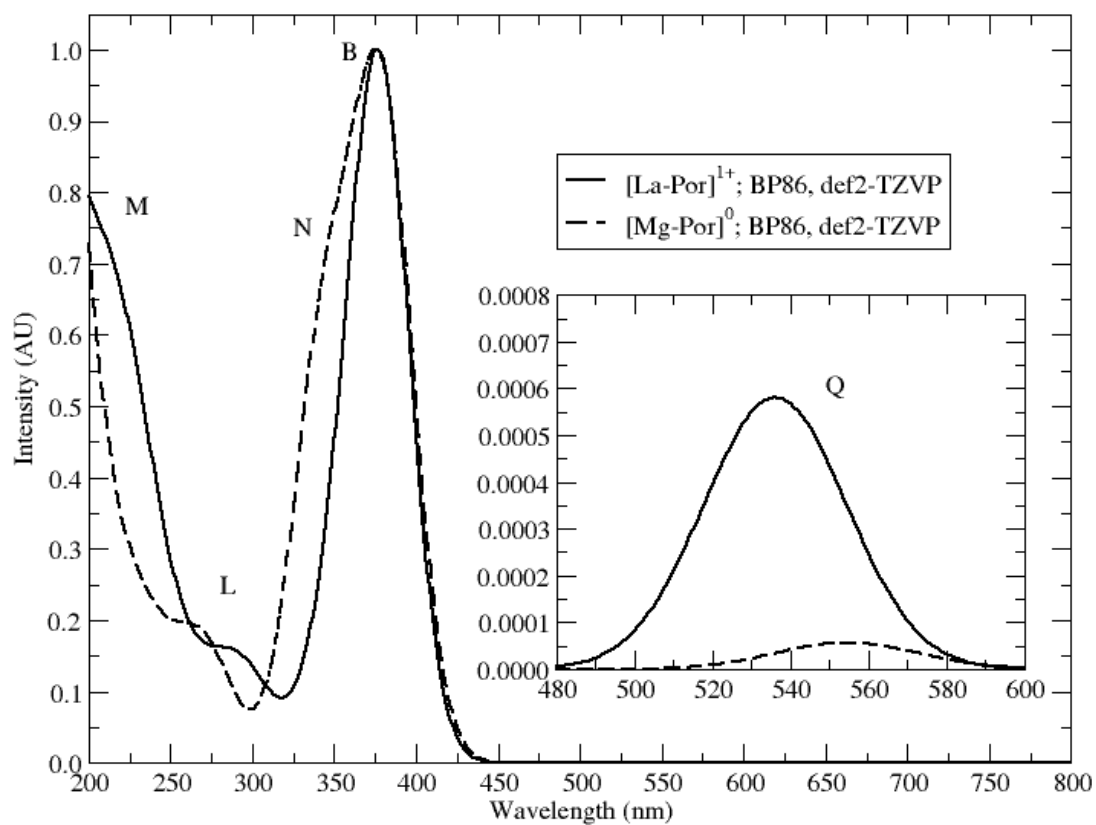

**Fig. S5c:**  
Comparison of TD-DFT/BP86 UV-Vis absorption spectra of [La-Por]<sup>+</sup> and [Mg-Por]<sup>0</sup>.

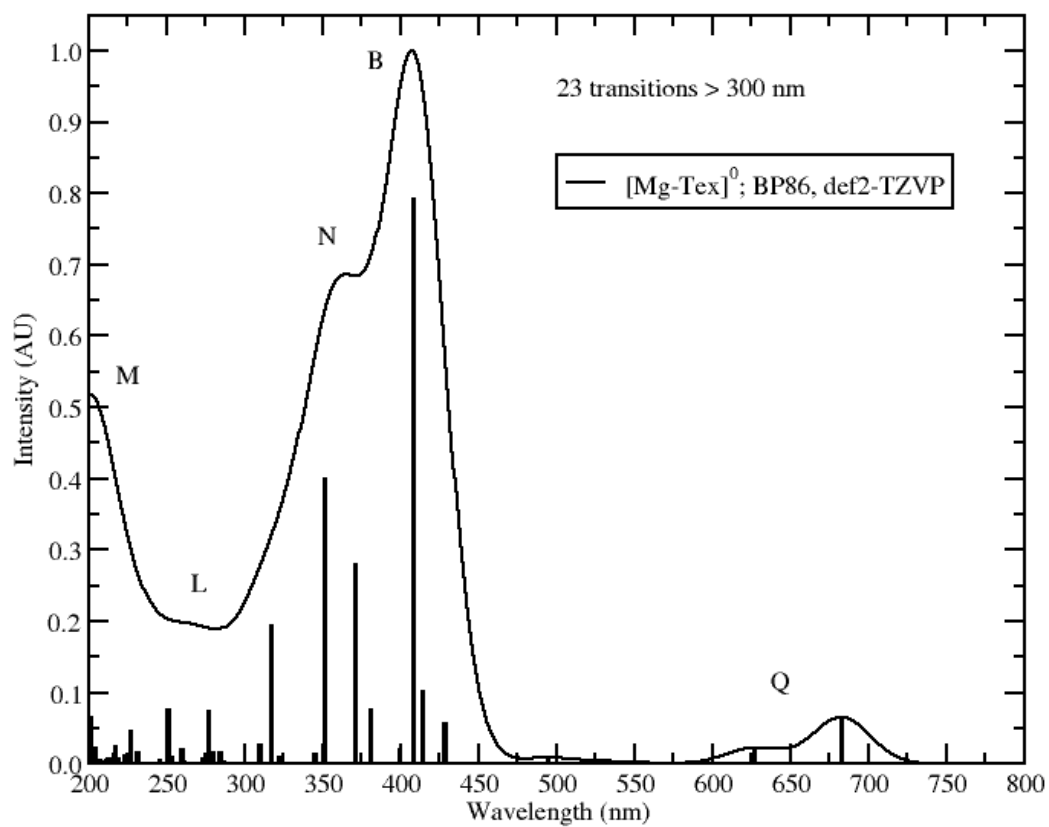

**Fig. S6a:**  
TD-DFT/BP86 UV-Vis absorption spectrum of  $[\text{Mg-Tex}]^+$ .

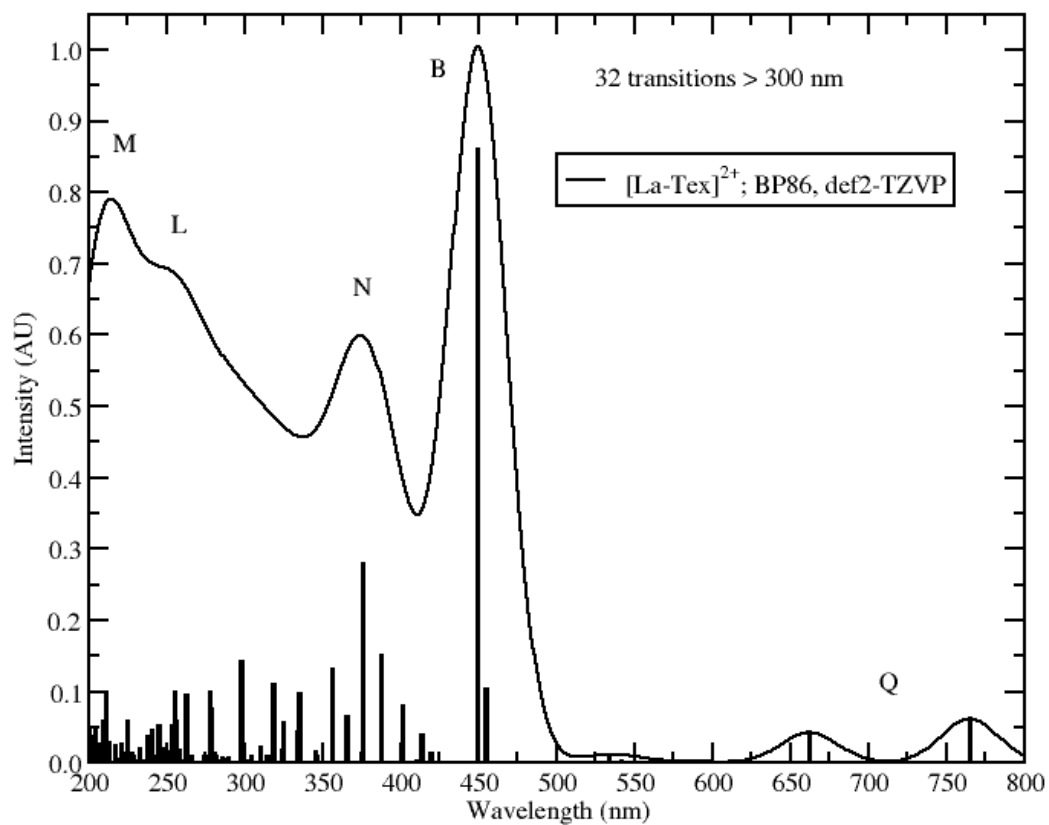

**Fig. 6b:**  
TD-DFT/BP86 UV-Vis absorption spectrum of [La-Tex]<sup>2+</sup>.

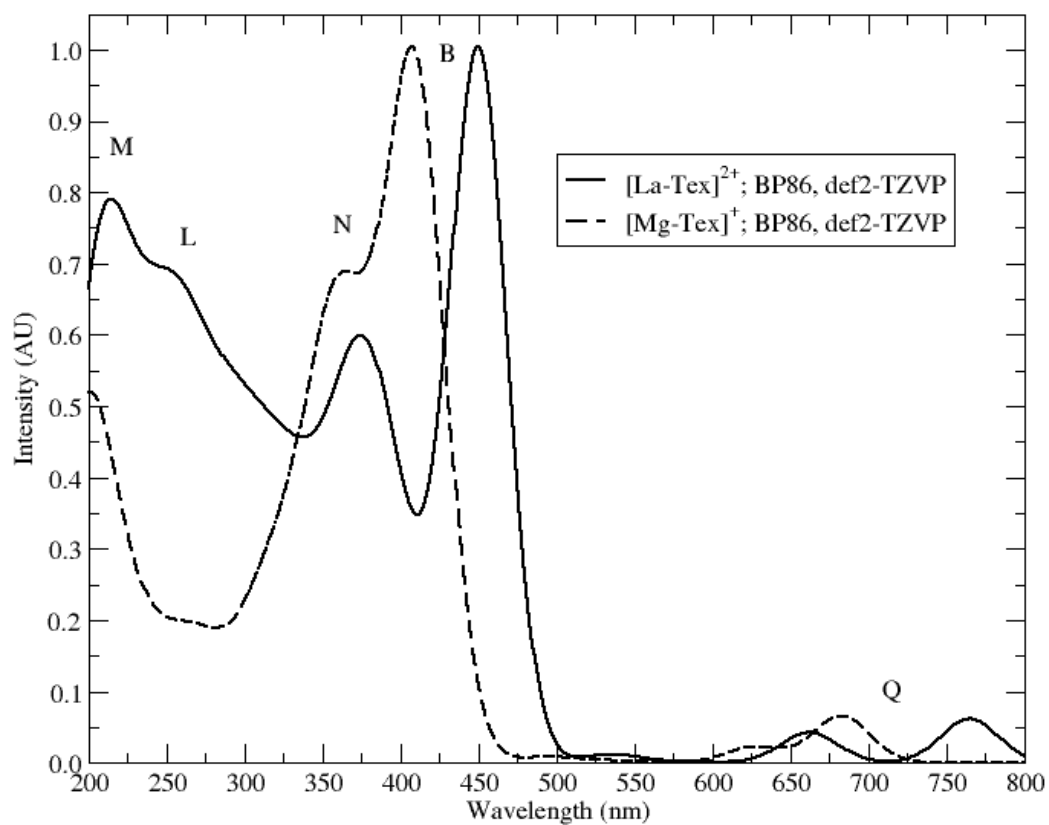

**Fig. S6c:**  
Comparison of TD-DFT/BP86 UV-Vis absorption spectra of [La-Tex]<sup>2+</sup> and [Mg-Tex]<sup>+</sup>.

## II.e Effects of Metal-Coordinated Water Molecules and Substitution at the Ring System on the UV-Vis Absorption Spectrum of $[\text{La-Tex}]^{2+}$

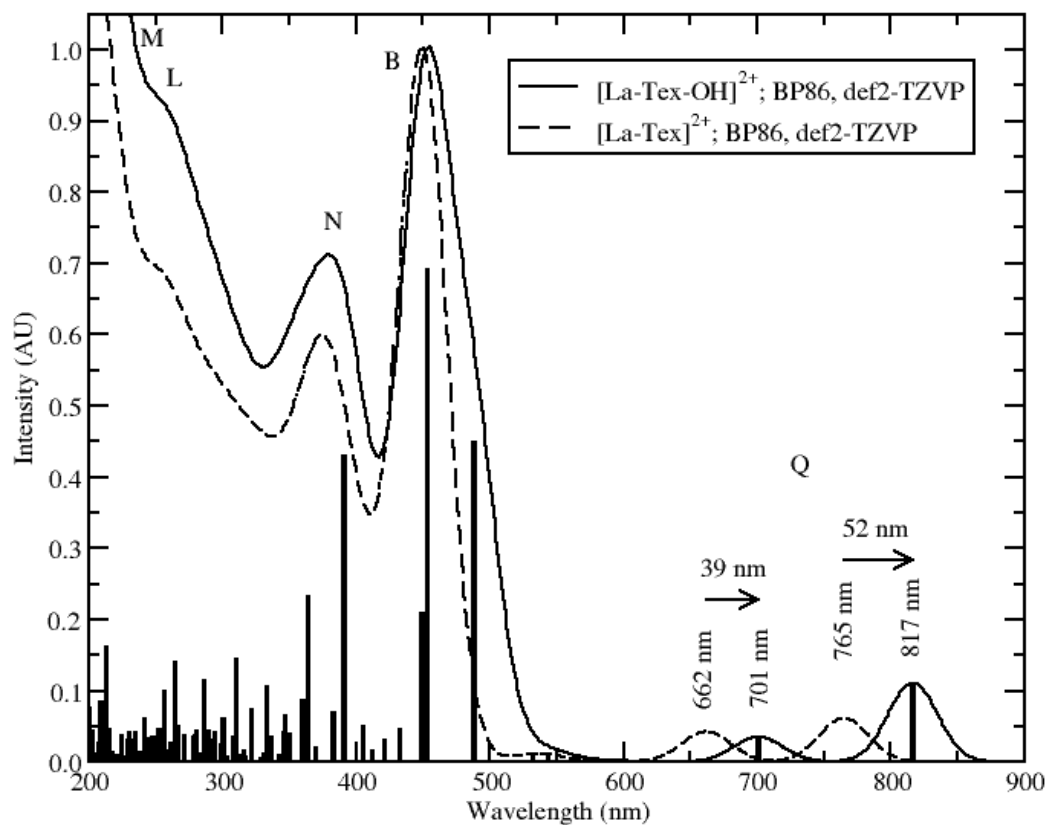

**Fig. S7a:**  
TD-DFT/BP86 UV-Vis absorption spectrum of  $[\text{La-Tex}]^{2+}$  with one  $-\text{OH}$  group at the  $\text{R}^4$  position (cf. Figure 1 in the main text).

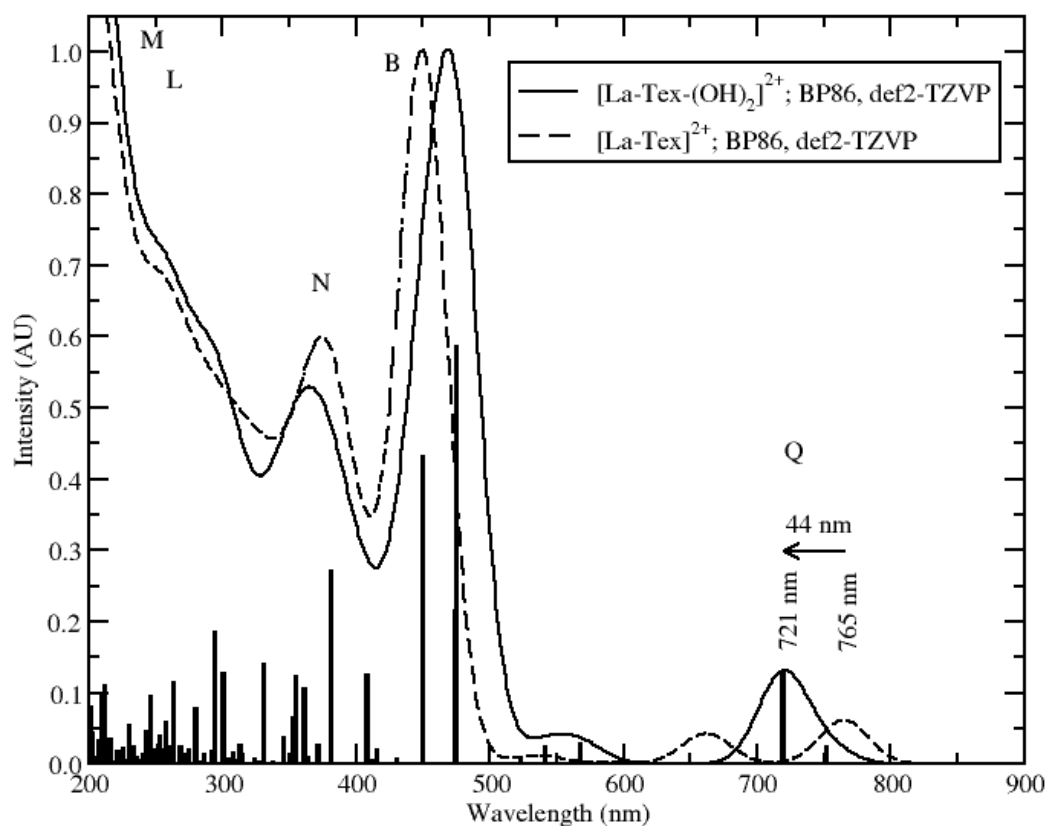

**Fig. S7b:**  
**TD-DFT/BP86 UV-Vis absorption spectrum of  $[\text{La-Tex}]^{2+}$  with two  $-\text{OH}$  groups at both  $\text{R}^4$  positions (cf. Figure 1 in the main text).**

Substitution with  $-\text{OH}$  groups in position 4 causes a red shift of the B-band, but a blue shift of the Q-band. The relative intensity of the Q-band is increased.

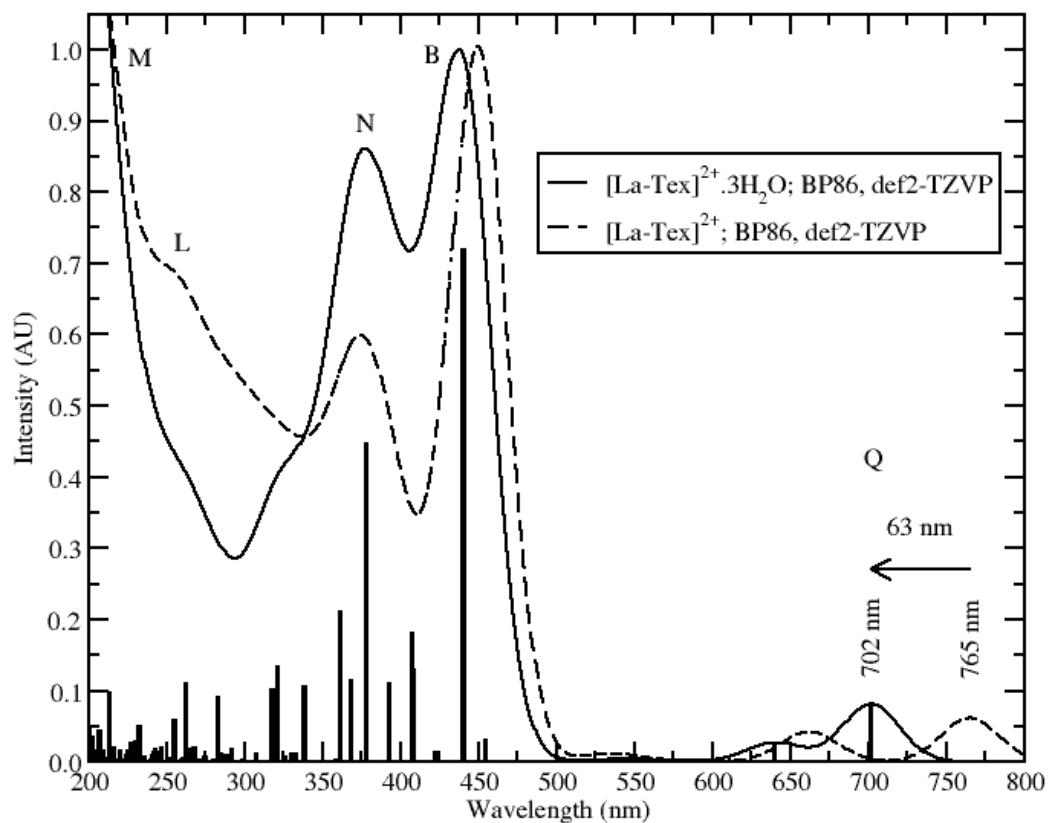

**Fig. S7c:**

**TD-DFT/BP86 UV-Vis absorption spectrum of [La-Tex]<sup>2+</sup> with three water molecules directly coordinated to the La<sup>3+</sup> central ion.**

The intensity of the N-band relative to the B-band is increased by almost 50% when three water molecules are directly coordinated to the La<sup>3+</sup> ion. At the same time the Q-band undergoes a large blue shift of 63 nm.



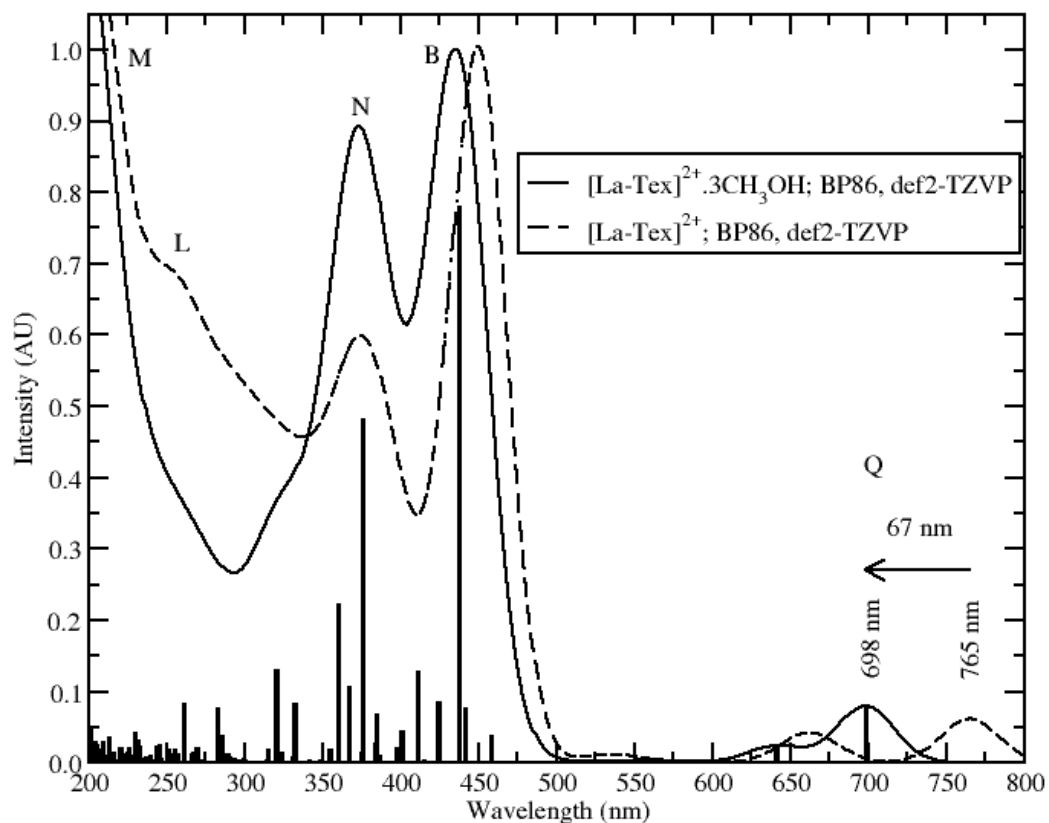

**Fig. S7d:**  
**TD-DFT/BP86 UV-Vis absorption spectrum of  $[\text{La-Tex}]^{2+}$  with three methanol molecules directly coordinated to the  $\text{La}^{3+}$  central ion.**

The spectrum of  $[\text{La-Tex}]^{2+}$  complexed by 3 methanol instead of 3 water molecules is almost unchanged. The change of the solvent leads only to minor shifts of the band maxima, i.e.,  $\lambda_{\text{max}}$  at 374, 435, 560, 643 and 698 nm for methanol compared to 378, 437, 544, 641 and 702 nm for water.

## II. Lanthanide Motexafins [Ln-Motex]<sup>2+</sup> (Ln=La, Gd, Lu)

### II.a Cartesian Coordinates of Optimized Structures of Lanthanide Motexafin Complexes (Ln=La, Gd, Lu)

Program used: TURBOMOLE V6.6

All energies are given in units of Hartree

All cartesian atomic coordinates are given in units of Bohr

Relativistic large-core (4f-in-core) pseudopotentials were used for La, Gd and Lu (ECP46MWB, ECP53MWB and ECP60MWB, respectively)

Solvent effects were calculated with COSMO (epsilon=80 for water) for the gas phase structures

\*\*\*\*\*

The input coordinates given below are for the optimized structures for basis sets A (cf. text).

[La-Motex.6H\_2O]<sup>{2+}</sup>:

input coordinates and input keywords

Energy: -3382.373266282

\$symmetry c1

\$dft

functional b-p

gridsize 5

\$coord

|                    |                   |                   |    |
|--------------------|-------------------|-------------------|----|
| 2.54475609212951   | 0.55304364469365  | 6.72186602932475  | c  |
| -0.21394012314231  | 0.53931407552916  | 7.06453073630435  | c  |
| -0.76881152927241  | 0.72510150833922  | 9.58181431051532  | n  |
| 1.45459442408670   | 0.93752110301380  | 10.86726760960915 | c  |
| 3.58888818761644   | 0.79812206669242  | 9.12931069334477  | c  |
| -2.07269404028522  | 0.48664302094050  | 5.15262531263263  | c  |
| -4.72729253019541  | 0.90033670837917  | 5.28524777698776  | c  |
| -6.09948898701792  | 1.50007314628846  | 7.41632126429245  | n  |
| -8.52049462058809  | 2.03747856604427  | 6.61444810425580  | c  |
| -8.73908401516800  | 1.65426516029039  | 3.87065155224051  | c  |
| -6.35512091074489  | 0.95334204028520  | 3.03372873595924  | c  |
| -10.53900385520831 | 2.99870560320964  | 8.09952259226694  | c  |
| -10.67115365402507 | 3.63390480168806  | 10.69138287651993 | c  |
| -8.73180885626019  | 3.25509788102879  | 12.35092768434900 | n  |
| -9.45098708873162  | 4.15493743052742  | 14.65441323872947 | c  |
| -12.01573490993073 | 5.15560925431887  | 14.53469782752393 | c  |
| -12.80591726774473 | 4.81755114052736  | 12.03074700387616 | c  |
| -7.70964783971114  | 4.11318794704349  | 16.74165836112126 | c  |
| -5.41878205287769  | 3.13402402264688  | 16.36906594715257 | n  |
| -4.76907528637670  | 0.66573178838769  | 12.08392205019372 | la |
| -7.87794189287643  | -2.98282944075260 | 11.55294823856438 | o  |
| -15.31883118299369 | 5.58177043927452  | 10.91382674141338 | c  |

|                    |                   |                   |   |
|--------------------|-------------------|-------------------|---|
| -17.57092175757033 | 3.81155677182500  | 11.54896122878880 | c |
| -17.20867448677129 | 1.06716942620914  | 10.72880258560028 | c |
| -15.30463287854024 | -0.21779500636747 | 12.20781264523579 | o |
| -13.46214735145951 | 6.33217640737673  | 16.67137940900225 | c |
| -5.55967875446717  | 0.29338000917293  | 0.38245706950118  | c |
| -5.41153720269177  | -2.57620747232313 | -0.13069950135513 | c |
| -11.13272217436567 | 1.87374326638261  | 2.35176417300950  | c |
| -12.77549247417378 | -0.53906840374131 | 2.46129240758835  | c |
| 1.45704908784062   | 1.39649982634275  | 13.54295085714688 | c |
| -0.71085974844710  | 1.64859473038948  | 14.77042200479571 | n |
| -1.00384486189023  | 2.23861802633098  | 17.28635589062151 | c |
| -3.49107828439408  | 3.09232132987846  | 18.13171918743338 | c |
| -3.79211835763942  | 3.87793378041893  | 20.68267565417200 | c |
| -1.80636258593689  | 3.72323479788471  | 22.40953596044528 | c |
| 0.62195147845177   | 2.69741194226376  | 21.60654809174274 | c |
| 0.98315280215311   | 2.06370626780890  | 19.07948340575759 | c |
| 2.32822395529445   | 2.46631290733040  | 23.47591662800688 | o |
| 4.67056105951408   | 1.14761294536357  | 23.10515821931152 | c |
| 4.35955939317915   | -1.69164515988689 | 23.49121838278073 | c |
| 2.72447592196918   | -2.65856586883056 | 21.60997709568354 | o |
| 1.88770374049290   | -5.16767593075591 | 22.00397491765997 | c |
| -0.45923559900562  | -5.64319414677637 | 20.39293277339833 | c |
| -0.02469081015837  | -5.54746449458261 | 17.71989554555386 | o |
| 0.87020743723589   | -7.87223387135326 | 16.67513311162953 | c |
| 1.30914125802777   | -7.66263690382457 | 13.84478609941408 | c |
| -1.02999426555946  | -7.57664632093050 | 12.49497609492310 | o |
| -0.73937839212931  | -7.90301442610911 | 9.83373093937643  | c |
| -1.89272721958384  | 4.32173247793210  | 24.86863371102237 | o |
| -4.15131757328554  | 5.19161750254823  | 26.11608798481619 | c |
| -4.17395648482803  | 8.04752326201135  | 26.44685032147895 | c |
| -4.87803890527617  | 9.24703309898530  | 24.14887035520461 | o |
| -4.97011039028735  | 11.94621558003415 | 24.29663281911310 | c |
| -7.09131937700586  | 12.90188374309637 | 22.61182464224543 | c |
| -9.38801584456911  | 11.97431083421292 | 23.62287621179757 | o |
| -11.57267821334008 | 12.61202517382233 | 22.21780894136831 | c |
| -13.86108301773599 | 11.39350388197219 | 23.45030193712217 | c |
| -13.77793718535633 | 8.72019133579659  | 23.13207838115746 | o |
| -15.74256646238806 | 7.43470184006492  | 24.43839824779436 | c |
| 6.33277415807603   | 0.96007468120990  | 9.83818625613801  | c |
| 3.93431315375701   | 0.44844976295186  | 4.24171686739160  | c |
| 5.01103417175165   | 2.99573876770701  | 3.26958591521880  | c |
| 3.07369383775578   | 5.09885025118145  | 2.82985361007451  | c |
| 1.97971735525826   | 6.04310725128208  | 5.12919299797412  | o |
| -3.44127056991707  | 5.35738250437327  | 11.37236084954038 | o |
| -12.27097547976967 | -3.10572378146471 | 9.49689499993567  | o |
| -2.80831481258143  | 6.81047310555784  | 6.74349998739076  | o |
| -9.09427387489036  | 6.54258019222331  | 22.12403081027400 | o |
| -1.34995253511066  | 0.19810124686866  | 3.22120784709838  | h |
| 3.30528915570462   | 1.67000519492906  | 14.49420014969992 | h |
| 2.77400402204053   | 1.20975607697143  | 18.48449339325486 | h |
| -5.63572523240498  | 4.61799555228751  | 21.29453142518115 | h |
| -8.29456428368500  | 4.96796522314187  | 18.57568244095806 | h |
| -12.27413850805075 | 3.38187051453012  | 7.01557835249791  | h |
| -10.66083636213222 | 2.30053481686265  | 0.34875015117325  | h |
| -12.26364716397729 | 3.51788264822718  | 3.01872792395342  | h |
| -14.58594878518146 | -0.25190741718457 | 1.43444264378180  | h |
| -11.78321687894067 | -2.16261237279757 | 1.57055996143915  | h |
| -13.20260826655184 | -1.08234842989842 | 4.44714872589678  | h |
| -3.69256576892038  | 1.16741440495664  | -0.04834150467463 | h |
| -6.90633302985718  | 1.16211891746637  | -0.97659829317391 | h |

|                    |                   |                   |   |
|--------------------|-------------------|-------------------|---|
| -4.82776712057141  | -2.94215102600343 | -2.11527769262199 | h |
| -4.02433741635688  | -3.51939204978081 | 1.13660142548881  | h |
| -7.27499964498766  | -3.49652046281005 | 0.17353058696925  | h |
| 6.93453420709518   | 2.94214748934927  | 10.22552543593473 | h |
| 6.76493651704793   | -0.15144593767590 | 11.56932560891752 | h |
| 7.56973941974261   | 0.23160398517156  | 8.30688717854336  | h |
| -4.07803033130861  | 4.29889368546665  | 28.01274074698001 | h |
| -5.89247310822475  | 4.55908528186516  | 25.12639052549699 | h |
| -2.26798522609385  | 8.69499999388863  | 27.08414831051535 | h |
| -5.55820019324546  | 8.51588894930410  | 27.97596748466050 | h |
| -15.15250807901930 | 5.73642479868174  | 8.82375880640311  | h |
| -15.80741872581659 | 7.51485983151772  | 11.58864314024367 | h |
| -19.29258004687589 | 4.56282747518854  | 10.60272609417348 | h |
| -17.97264626532629 | 3.85416454870363  | 13.61523269183510 | h |
| -18.98912457752317 | -0.01609892423313 | 10.98387836178564 | h |
| -14.11903142770482 | 1.08134230181463  | 12.84251275527219 | h |
| -12.21733996969181 | 6.89281527191264  | 18.26331651168495 | h |
| -14.51650568165070 | 8.03560980446459  | 16.03083556147219 | h |
| -14.89317130626144 | 5.00483335815168  | 17.46363320676610 | h |
| -5.36075433183101  | 12.55179316150304 | 26.27724084506723 | h |
| -3.12557681903030  | 12.77808123177191 | 23.70006753996817 | h |
| -7.05523713637225  | 15.01753056741806 | 22.57677997290199 | h |
| -6.81180176182468  | 12.2240691620442  | 20.62570038974964 | h |
| -11.86493814331386 | 14.70751036407231 | 22.18462967382817 | h |
| -11.39816442308660 | 11.96266537058786 | 20.21049218132447 | h |
| 2.48631345886483   | -5.96294835617962 | 13.40495536883486 | h |
| -2.65752510280851  | -7.83140318313107 | 8.99162900625383  | h |
| 0.45429242617088   | -6.38140303516015 | 8.98932120781202  | h |
| 0.12744458970069   | -9.77603231819353 | 9.40621494579480  | h |
| -15.62027145970091 | 12.17111655075111 | 22.57474670462188 | h |
| -13.88676812106578 | 11.88584217393659 | 25.50460581076048 | h |
| -15.49400364122843 | 5.38497479850679  | 24.07517171024158 | h |
| -15.64730093100870 | 7.78423173562650  | 26.51836389365192 | h |
| -17.64261519355516 | 8.03471630584039  | 23.74169625185665 | h |
| -7.90998202114896  | 7.83886498879867  | 22.79132730580442 | h |
| -10.79484615109069 | 7.17978739599164  | 22.63197705775315 | h |
| -9.63366387826199  | -3.12929576510944 | 10.67301074987134 | h |
| -7.75255678250503  | -4.29920014837727 | 12.85228002496808 | h |
| -13.05321991721259 | -4.69104425529073 | 8.94119954610491  | h |
| -13.56204384780646 | -2.14419064831509 | 10.56184727850222 | h |
| -16.69668862892633 | 0.97747546441728  | 8.68128944710964  | h |
| -3.14964932428065  | 5.95022652985623  | 9.52862270476476  | h |
| -4.53448159283666  | 6.62735957627006  | 12.16100363138565 | h |
| -1.05545140576041  | 6.55140920780144  | 6.05140037825877  | h |
| -3.93462913095062  | 5.78589330300356  | 5.68444432414161  | h |
| 3.27858589692305   | 6.92815811509548  | 6.11395558568193  | h |
| 3.95240016553395   | 6.67752688983536  | 1.74399315730766  | h |
| 1.45133266147545   | 4.40086758132989  | 1.69175182472130  | h |
| 6.00280785258501   | 2.63653718184463  | 1.44750190834653  | h |
| 6.49338254237895   | 3.70070227817586  | 4.59253440083290  | h |
| 5.54532778104027   | -0.89611522538633 | 4.41205379896676  | h |
| 2.68754531597629   | -0.36237656174413 | 2.75445884145402  | h |
| -3.43314763946028  | -3.54099271206551 | 14.34627030704658 | o |
| -2.81948895526624  | -5.05810003059460 | 13.35860248798200 | h |
| -2.33062555785234  | -3.70557671913952 | 15.87073682666871 | h |
| 5.50178304743771   | 1.59246182490464  | 21.22650383294776 | h |
| 5.95632412634824   | 1.90424702492871  | 24.57770408283666 | h |
| 6.27496338780731   | -2.59378290209656 | 23.41654117807238 | h |
| 3.56591076924904   | -2.04237917279736 | 25.41997863112914 | h |
| 1.34094942463721   | -5.47202187344771 | 24.02615509323615 | h |

```

3.42372518880483      -6.55821287786176      21.57073964865556      h
-1.30596043159760     -7.50138380813558      20.92382951138415      h
-1.86535912586097     -4.13954211209191      20.80294385818634      h
2.70725414628958     -8.40956578319136      17.56178017941549      h
-0.51000023205232     -9.42587810957071      17.05661567008453      h
2.38881241026621     -9.37031747644321      13.23835156725551      h
$user-defined bonds
$end

```

```

[Gd-Motex.6H_20]^{2+}:
input coordinates and input keywords
Energy: -3386.706650373 ==> CN(Gd):8

```

```

$symmetry c1
$dft

```

```

functional b-p
gridsize 5
$coord

```

```

2.51166400331915      0.28863428021802      6.86084667745705      c
-0.24398952990671     0.38363546258221      7.18187765390524      c
-0.82464090587969     0.69604629725285      9.68288259483469      n
1.40408109775921     0.86307487080225      10.97180442342184      c
3.54495837118556     0.57997331818250      9.26679632094503      c
-2.08031033817091     0.29287859661721      5.25821684016866      c
-4.71696085611620     0.76651662767450      5.38382420290984      c
-6.06204348929461     1.49697415306524      7.49321104466486      n
-8.48273088297253     2.00353420776135      6.66224953176184      c
-8.71885887534025     1.48425920189584      3.94456561534318      c
-6.34809971724852     0.71731477654029      3.13758785958706      c
-10.50064114959321    3.02198519009043      8.09692282796922      c
-10.62971663237767    3.69774533988497      10.67200973364612      c
-8.68644330278437     3.34353990019604      12.33206576020324      n
-9.45049676649933     4.21491909155729      14.63115492153339      c
-12.02400259069119    5.18597604804892      14.50432011070760      c
-12.78868906813378    4.85302293700002      11.99412622216381      c
-7.74122409499264     4.14707312097957      16.73056870947919      c
-5.44777888537975     3.18090138117315      16.34850955136843      n
-4.69968822348319     1.08933751879659      12.05047004440944      gd
-7.66561625539699     -2.36881142955653      11.66426969141205      o
-15.29798080206614    5.59029220549597      10.85110033527057      c
-17.54831333151462    3.81836230546446      11.48799106847143      c
-17.15103083428245    1.05770595552589      10.74238635891586      c
-15.26837908283261    -0.17482985151552      12.29220644387591      o
-13.49633727596020    6.32460577510440      16.64424997054376      c
-5.56679738594428     -0.08334600616992      0.52088264547637      c
-5.44378898529810     -2.97510026466479      0.14467957458848      c
-11.11684216537662    1.64558270228841      2.42539296932104      c
-12.77091853954469    -0.75170590508055      2.64553469222087      c
1.39578767487566      1.37474924787754      13.62680568643896      c
-0.78693437636366     1.73778797644146      14.79794145680530      n
-1.07407105700808     2.28737886905164      17.32045432576238      c
-3.56157096638594     3.12012521209313      18.15129985498784      c
-3.90541295928529     3.84591815745693      20.71317025725165      c
-1.93789898871085     3.65762760671223      22.45729386446895      c
0.50437933010231     2.65622062636209      21.66016009919304      c
0.89734235677257     2.07402754723531      19.12645226493450      c
2.18950424146597     2.39247837117231      23.54402040716583      o
4.57618175585774     1.16077855072684      23.15262609327557      c
4.35296150858990     -1.70332124957074      23.38901031036029      c
2.79881980223722     -2.62231962678254      21.41745562111269      o
1.99606131237982     -5.16207328627271      21.65653008753337      c

```

|                    |                   |                   |   |
|--------------------|-------------------|-------------------|---|
| -0.36357086138047  | -5.55589311074814 | 20.04010144937467 | c |
| 0.03693505471743   | -5.25836235864593 | 17.37675871075658 | o |
| 0.92447873769051   | -7.49921654992161 | 16.15935239545770 | c |
| 1.32968611759972   | -7.08953639922916 | 13.34684093805772 | c |
| -1.02619403524821  | -6.86847744275125 | 12.04280857210267 | o |
| -0.78209065640504  | -7.01184302301108 | 9.36018990041686  | c |
| -2.05240429675746  | 4.20429162776485  | 24.92638839196283 | o |
| -4.32006564842475  | 5.06759474975019  | 26.16256773740779 | c |
| -4.30643069661479  | 7.91308633500962  | 26.57250918996357 | c |
| -4.95201236834864  | 9.18553366392463  | 24.29662548777218 | o |
| -5.02077635571683  | 11.88025245359436 | 24.52186044258002 | c |
| -7.10753083797721  | 12.90720038853289 | 22.83598399591244 | c |
| -9.42626993315200  | 11.97087832016182 | 23.78533921925198 | o |
| -11.58515696093261 | 12.65942854913482 | 22.36450482371314 | c |
| -13.89682061095658 | 11.42593104823546 | 23.53686488135602 | c |
| -13.82437368898781 | 8.76044001489132  | 23.15519874721765 | o |
| -15.80099074708823 | 7.45381022788300  | 24.42145242631043 | c |
| 6.28615700541588   | 0.67718043166579  | 9.99616576243084  | c |
| 3.91134478083902   | 0.07812782263382  | 4.39358885516862  | c |
| 5.03750702907590   | 2.57814247919059  | 3.35438392966621  | c |
| 3.14525920317365   | 4.71323110787875  | 2.87241007481165  | c |
| 2.11137659134535   | 5.76313600120443  | 5.15664481441757  | o |
| -3.43578126300145  | 5.47191883521247  | 11.28438412475388 | o |
| -12.06269138999320 | -2.96699222927158 | 9.69935337696549  | o |
| -2.62017261925844  | 6.84442440101708  | 6.70255178851490  | o |
| -9.15733327160153  | 6.57171158622942  | 22.11532088002106 | o |
| -1.36155435756740  | -0.10576798948944 | 3.34569617899671  | h |
| 3.23275583640041   | 1.55317005201334  | 14.61735912493911 | h |
| 2.69251116417471   | 1.22464794237735  | 18.54200207642169 | h |
| -5.75677549595408  | 4.57113982221773  | 21.31902852965287 | h |
| -8.33890770259457  | 4.96552683717102  | 18.57553249172243 | h |
| -12.23408101557910 | 3.37238183348270  | 7.00048152425460  | h |
| -10.64786852991284 | 1.97895041965939  | 0.40402103347009  | h |
| -12.23816805042432 | 3.32387560641332  | 3.01880558193747  | h |
| -14.58670710836896 | -0.49701292193215 | 1.61985502558612  | h |
| -11.79286661848090 | -2.41567895554397 | 1.81562912814992  | h |
| -13.18676071400988 | -1.21100376267233 | 4.65456661511422  | h |
| -3.69495169950799  | 0.75338556033616  | 0.03954978671833  | h |
| -6.91200426969478  | 0.72802176671564  | -0.87470540824497 | h |
| -4.88095732792405  | -3.43872843582135 | -1.82543028284044 | h |
| -4.05217483132858  | -3.86861891604042 | 1.44284315359697  | h |
| -7.31101830232067  | -3.86573861868768 | 0.50748746763304  | h |
| 6.96026155324831   | 2.65411554739229  | 10.27481703709190 | h |
| 6.66038953451136   | -0.34718494740855 | 11.79302466509150 | h |
| 7.50740589210293   | -0.18418006426722 | 8.52208061829244  | h |
| -4.29100657838566  | 4.12055112323411  | 28.03375815624803 | h |
| -6.05339454806137  | 4.49000280929272  | 25.12720172706923 | h |
| -2.40232899679411  | 8.51319233812992  | 27.25964183215969 | h |
| -5.71008263186231  | 8.36051912681900  | 28.08994770837291 | h |
| -15.11608083949202 | 5.72289096985280  | 8.76110286948354  | h |
| -15.79994171665554 | 7.52907633488139  | 11.49963830426176 | h |
| -19.25729528210446 | 4.53424258258048  | 10.49274401941186 | h |
| -17.98997094334510 | 3.90770690044854  | 13.54472703055980 | h |
| -18.92893936773145 | -0.03216691909896 | 10.98630701835232 | h |
| -14.11977872778680 | 1.15184209342781  | 12.93847587361866 | h |
| -12.26209716039292 | 6.92662697523444  | 18.22967848734968 | h |
| -14.60415382763087 | 7.99350552902639  | 16.00392925897923 | h |
| -14.88266840226136 | 4.95667826223416  | 17.44741204724167 | h |
| -5.43592941371998  | 12.43135769820868 | 26.51331778832090 | h |
| -3.15963089182493  | 12.71131150946509 | 23.97787113286133 | h |

|                    |                   |                   |   |
|--------------------|-------------------|-------------------|---|
| -7.05086436623438  | 15.02256261311075 | 22.86639788614964 | h |
| -6.80554575049124  | 12.28634362861054 | 20.83406864452860 | h |
| -11.86353169533705 | 14.75704367514574 | 22.37810139503300 | h |
| -11.38600232313240 | 12.05759115478178 | 20.34472219609054 | h |
| 2.52542917858393   | -5.37909678007850 | 13.01236227423765 | h |
| -2.71017587667506  | -6.83386346599646 | 8.55849729913147  | h |
| 0.43386357670282   | -5.46030553415082 | 8.60819680200748  | h |
| 0.03250257019096   | -8.87050920813630 | 8.79058655309390  | h |
| -15.64112012503252 | 12.23483277877610 | 22.66019376338219 | h |
| -13.94350937426805 | 11.86735609615148 | 25.60224689353772 | h |
| -15.55093189098378 | 5.41071319110965  | 24.02351379662369 | h |
| -15.72230316465939 | 7.76502212206277  | 26.50812580616087 | h |
| -17.69477650524044 | 8.06859535830011  | 23.72062561587642 | h |
| -7.96252259526998  | 7.83389754292723  | 22.82809059358296 | h |
| -10.85406197878371 | 7.21333388903116  | 22.63176995207236 | h |
| -9.42237274414602  | -2.67126456257333 | 10.82905415929540 | h |
| -7.37683773134050  | -3.63178387570910 | 12.99285210745955 | h |
| -12.70286443241352 | -4.65070042540208 | 9.26429565856249  | h |
| -13.42416899784295 | -2.05524668287149 | 10.72053516555340 | h |
| -16.59444538139288 | 0.92045830334379  | 8.70932070295360  | h |
| -3.06638213172950  | 6.05800118821129  | 9.43865130053163  | h |
| -4.36085196156542  | 6.83925623227562  | 12.12150943023009 | h |
| -0.87851811065263  | 6.45066401977070  | 6.03476476600373  | h |
| -3.81303308490126  | 5.92266609678501  | 5.62149182543316  | h |
| 3.44072133615361   | 6.67506282028646  | 6.07424807732998  | h |
| 4.04442928739516   | 6.23328792741831  | 1.72236115808010  | h |
| 1.48821493169252   | 4.01878382090718  | 1.78345624194179  | h |
| 6.01087554143376   | 2.15291251353024  | 1.53668128065667  | h |
| 6.54248184021670   | 3.28253411569284  | 4.65144575436069  | h |
| 5.49785049438205   | -1.28807111342419 | 4.61085414951200  | h |
| 2.65723268937802   | -0.75228776941649 | 2.92361391619134  | h |
| -3.47242467875869  | -3.02069407612142 | 14.18834916133623 | o |
| -2.77985091192866  | -4.44193863452472 | 13.10571940309950 | h |
| -2.34920542559882  | -3.19923544929255 | 15.69019531950221 | h |
| 5.42299277078360   | 1.72695749474909  | 21.31334617855874 | h |
| 5.81207742610599   | 1.88155409034619  | 24.68469713371097 | h |
| 6.29977342644262   | -2.53575700125524 | 23.32005309996366 | h |
| 3.52379826963198   | -2.17850392580838 | 25.27542963920614 | h |
| 1.47328602941284   | -5.60394218732623 | 23.65898766191092 | h |
| 3.54320424506994   | -6.50196464066446 | 21.11778584076728 | h |
| -1.17542950551662  | -7.46146117173263 | 20.44220461930007 | h |
| -1.78726089354455  | -4.10958652133242 | 20.57670087789077 | h |
| 2.77271749762668   | -8.09769514561626 | 16.98260935437473 | h |
| -0.44995095324327  | -9.07855535001749 | 16.44494018488306 | h |
| 2.37193358395099   | -8.76506388850330 | 12.60142541823106 | h |

\$user-defined bonds  
\$end

```
[Gd-Motex.6H_20]^{2+}:
input coordinates and input keywords
Energy: -3386.698838421 ==> CN:7
$symmetry c1
$dft
functional b-p
gridsize 5
$coord
```

|                   |                  |                   |   |
|-------------------|------------------|-------------------|---|
| 2.13348677114642  | 0.22466848242489 | 6.45110898351171  | c |
| -0.57484222917776 | 0.77128221450185 | 6.73728175219404  | c |
| -1.11320028936182 | 1.16421663943073 | 9.23026613672966  | n |
| 1.07746330370029  | 0.89943168594897 | 10.56413915464542 | c |

|                    |                   |                   |    |
|--------------------|-------------------|-------------------|----|
| 3.16440280858370   | 0.28038772713889  | 8.87692469263756  | c  |
| -2.41894402946805  | 0.90715113260752  | 4.81703469177781  | c  |
| -5.02171527548236  | 1.55995036492762  | 4.94222060965503  | c  |
| -6.35888192273661  | 2.29727031691263  | 7.05919780885099  | n  |
| -8.77590838674437  | 2.86192299096691  | 6.24249476589427  | c  |
| -9.00354759006781  | 2.43328805575942  | 3.50996041508114  | c  |
| -6.64921454418465  | 1.61586725623630  | 2.69469157322303  | c  |
| -10.81669009515662 | 3.76187976548601  | 7.73155109087558  | c  |
| -10.94042674697947 | 4.34970404188918  | 10.33364344659483 | c  |
| -8.90547591951628  | 4.19537069278731  | 11.91316728431656 | n  |
| -9.66893835273340  | 4.89092296769523  | 14.27822754860257 | c  |
| -12.34288534237053 | 5.54713440514734  | 14.26790124077659 | c  |
| -13.16705950112182 | 5.16470806001168  | 11.77948098889378 | c  |
| -7.92946439557718  | 4.78188575045133  | 16.35750665346704 | c  |
| -5.60079587502548  | 3.92048174270398  | 15.91801765117510 | n  |
| -4.82322426538569  | 2.33230182531628  | 11.50489520235976 | gd |
| -6.17149486086241  | -1.62283107650894 | 12.73270815750799 | o  |
| -15.83268261314758 | 5.35539720800198  | 10.79318962851932 | c  |
| -17.53657790415975 | 3.04469023238354  | 11.44002935669836 | c  |
| -16.39110553062626 | 0.46188089348583  | 10.81344358802875 | c  |
| -14.41871457782231 | -0.23850862055398 | 12.55507537593888 | o  |
| -13.87816458307053 | 6.38431830537256  | 16.50050341249559 | c  |
| -5.88870680147411  | 0.84613165712691  | 0.06242861703272  | c  |
| -5.95364438196859  | -2.03655483363280 | -0.39459091432195 | c  |
| -11.36341718835877 | 2.77217414737379  | 1.95523814186749  | c  |
| -13.20824761065188 | 0.51355381942051  | 2.08270640037522  | c  |
| 1.07338819564790   | 1.30343874625400  | 13.24078301620232 | c  |
| -1.05834294323326  | 1.99442395072633  | 14.38395002894591 | n  |
| -1.34759474517587  | 2.51747364897669  | 16.91730921168929 | c  |
| -3.76194466890811  | 3.57926790764886  | 17.73714540361481 | c  |
| -4.10774534128707  | 4.18771646443107  | 20.32853130393524 | c  |
| -2.19517547218057  | 3.78730412817659  | 22.09369520838371 | c  |
| 0.21573827056963   | 2.71369080415788  | 21.28191873378503 | c  |
| 0.56406583456164   | 2.07653771303121  | 18.75113579398961 | c  |
| 1.91375820452608   | 2.46448528611034  | 23.14033715128020 | o  |
| 4.44445415819500   | 1.59666596799676  | 22.66484834658850 | c  |
| 4.75217882278645   | -1.19650573702690 | 23.26209694171919 | c  |
| 3.23215672313208   | -2.69561863750094 | 21.65647508392536 | o  |
| 3.54349434893865   | -5.31931862174966 | 22.17252420748355 | c  |
| 1.39955174227749   | -6.90593237286654 | 21.11196067117061 | c  |
| 1.54826047839537   | -7.11617190721697 | 18.44012644027288 | o  |
| 0.14718255243967   | -9.19792600733068 | 17.49141597677441 | c  |
| 0.79122422997002   | -9.66592338976956 | 14.73407437971605 | c  |
| -0.04593532928582  | -7.61032186030604 | 13.20097968606892 | o  |
| 0.18096010591867   | -8.05752037138864 | 10.56443630700377 | c  |
| -2.31996501019809  | 4.23701811003820  | 24.57778325364930 | o  |
| -4.61174392741451  | 4.99773407952050  | 25.84400955505699 | c  |
| -4.62863874701203  | 7.80356075012606  | 26.46912373519927 | c  |
| -5.30605150074359  | 9.24202524960144  | 24.30375053782165 | o  |
| -5.44819711423761  | 11.90586766511242 | 24.75185921618587 | c  |
| -7.53357339623279  | 13.01923526869946 | 23.12005350897467 | c  |
| -9.84362063549380  | 11.95564716079120 | 23.94864208887462 | o  |
| -11.99359521356033 | 12.69418309486019 | 22.53805799066978 | c  |
| -14.30049114415092 | 11.34364315148085 | 23.58452117076460 | c  |
| -14.17169203556585 | 8.70971351796693  | 23.03432949227701 | o  |
| -16.14392148700741 | 7.28971881381771  | 24.18157417695252 | c  |
| 5.86131338998065   | -0.14529521091171 | 9.64831314624938  | c  |
| 3.50569544776716   | -0.18729034966356 | 3.99556921790404  | c  |
| 4.98911173871786   | 2.12760125851488  | 2.97542388013796  | c  |
| 3.43964721899740   | 4.53259714715366  | 2.54282606527103  | c  |



|                    |                   |                   |   |
|--------------------|-------------------|-------------------|---|
| 2.64827057775570   | 5.72376538949028  | 4.85939408487490  | o |
| -3.26901418230682  | 6.56128777084990  | 10.77049493542386 | o |
| -10.55218335660677 | -3.34504070015811 | 11.49829911619337 | o |
| -1.68390913546807  | 7.84372805288854  | 6.41045033698673  | o |
| -9.44169602678797  | 6.72840595173940  | 21.88722025823542 | o |
| -1.74353366888716  | 0.45586281040330  | 2.90061948355537  | h |
| 2.87584416039428   | 1.09497635392827  | 14.28508457059952 | h |
| 2.30455665335173   | 1.10399050514702  | 18.18480966236282 | h |
| -5.90906308776729  | 5.02663001039674  | 20.93612633880794 | h |
| -8.57935822279247  | 5.37750675207158  | 18.26933376006701 | h |
| -12.58185703850023 | 4.06229000635922  | 6.67079364437502  | h |
| -10.82332076374031 | 3.09072711885074  | -0.05036690636724 | h |
| -12.36754954378813 | 4.52479844455405  | 2.54470372263480  | h |
| -14.88724435479188 | 0.86364211049823  | 0.87018979729329  | h |
| -12.29173317263128 | -1.25560214150717 | 1.41790387397317  | h |
| -13.88974453386411 | 0.17774412787358  | 4.04430202038268  | h |
| -3.96101160628784  | 1.57151364989585  | -0.37327490421090 | h |
| -7.16034309958099  | 1.78376651449620  | -1.32320421056175 | h |
| -5.39062919197680  | -2.48326360481183 | -2.36841416811958 | h |
| -4.64853187489975  | -3.05762475276817 | 0.89898652852454  | h |
| -7.88236766259375  | -2.80878079577083 | -0.08575473666133 | h |
| 6.85277256907024   | 1.66275722651212  | 10.08196482250637 | h |
| 6.00243479580643   | -1.34428541490683 | 11.36922235610063 | h |
| 6.95708870202819   | -1.09822499288306 | 8.13315706778801  | h |
| -4.59954916168072  | 3.91125547824533  | 27.63815045276968 | h |
| -6.32396454974646  | 4.48662745468280  | 24.74015491319459 | h |
| -2.72936483666519  | 8.37420876136989  | 27.19414903502789 | h |
| -6.02947601381300  | 8.11270556801001  | 28.02305049728088 | h |
| -15.80098062608128 | 5.60919658464772  | 8.70690128419707  | h |
| -16.75259228619756 | 7.08262948870565  | 11.56532735725057 | h |
| -19.34975022640335 | 3.25233983996285  | 10.39470339066224 | h |
| -18.03517033762922 | 3.05937795463513  | 13.48459040078058 | h |
| -17.85286611365020 | -1.03745894446061 | 10.95494385351317 | h |
| -13.53555607588972 | 1.32761718997921  | 13.05369147976765 | h |
| -12.68050308106956 | 7.09163040057728  | 18.06967174657029 | h |
| -15.22811946807810 | 7.90523627729371  | 15.96797342586787 | h |
| -15.02849680106531 | 4.80192665781979  | 17.28210186796758 | h |
| -5.90966010449916  | 12.27660519367664 | 26.77487480736968 | h |
| -3.60090719796275  | 12.82615911807841 | 24.31410583575537 | h |
| -7.52901877500504  | 15.12550901180283 | 23.32522213469531 | h |
| -7.18514381487884  | 12.57342410913407 | 21.07929742217620 | h |
| -12.31518541856487 | 14.78019317622527 | 22.68668255285540 | h |
| -11.74796851655638 | 12.23291745944282 | 20.48675050964938 | h |
| 2.87629515616534   | -9.91021009390427 | 14.51108105258581 | h |
| -0.47331639074632  | -6.32510204963760 | 9.58124070561867  | h |
| 2.18629271900689   | -8.43806059666394 | 10.02966712968068 | h |
| -1.00294765609742  | -9.69586081655076 | 9.95315587432426  | h |
| -16.04364868934659 | 12.17657780653754 | 22.72828045379766 | h |
| -14.39299250544454 | 11.64958947512244 | 25.67261646469544 | h |
| -15.85135889076530 | 5.28134398822006  | 23.65663081802783 | h |
| -16.10168820138798 | 7.46641050779464  | 26.28482050607787 | h |
| -18.03751388575856 | 7.91698597739570  | 23.49167847436622 | h |
| -8.30393637379614  | 7.96282710182563  | 22.72839123257274 | h |
| -11.16642538049404 | 7.26804193670092  | 22.42643255605898 | h |
| -7.92540882994535  | -2.39924627436272 | 12.32757924635088 | h |
| -5.11616305841759  | -2.80075777958883 | 13.87945517713768 | h |
| -10.70560549121530 | -3.90356138347981 | 9.73949868528594  | h |
| -12.11593653257929 | -2.31244563167368 | 11.89937049973840 | h |
| -15.65532451231438 | 0.44350432577663  | 8.82920744741775  | h |
| -2.58249001318904  | 7.12360230595150  | 8.99957925584794  | h |

|                   |                    |                   |   |
|-------------------|--------------------|-------------------|---|
| -3.60307574378029 | 8.07452617224567   | 11.78108936726245 | h |
| -0.08933613125438 | 7.02771273168942   | 5.74494306508231  | h |
| -2.97306107693906 | 7.68228492606981   | 5.08955545399569  | h |
| 4.13570469292800  | 6.40050108063017   | 5.73819797466438  | h |
| 4.53221242324253  | 5.89996413717495   | 1.36934469536811  | h |
| 1.66305641542993  | 4.11068133435173   | 1.50416687907581  | h |
| 5.87046812966630  | 1.58449782812396   | 1.14246257455070  | h |
| 6.59518835992678  | 2.57853119409603   | 4.26427788850450  | h |
| 4.87173709516036  | -1.77278705037586  | 4.21457001411649  | h |
| 2.15092080621391  | -0.81785343759566  | 2.51580019720767  | h |
| -3.25454973996379 | -4.44246990477150  | 15.44751938876961 | o |
| -2.09002587863096 | -5.61184054350884  | 14.48618192551516 | h |
| -2.20648344716882 | -3.70961025389966  | 16.78975994377294 | h |
| 5.03386182243094  | 2.05181454193550   | 20.70158932887476 | h |
| 5.65288167858308  | 2.69656826988143   | 23.98066729024644 | h |
| 6.80915235211662  | -1.66489974206894  | 23.05654494221092 | h |
| 4.23981030968227  | -1.52830661511518  | 25.28888330059118 | h |
| 3.57497125378479  | -5.63360047473144  | 24.26340370459482 | h |
| 5.38341943412755  | -6.01242015664137  | 21.39466450151229 | h |
| 1.56122080765140  | -8.82182156738900  | 21.99422637454144 | h |
| -0.45841474765566 | -6.09267726327557  | 21.71684667699723 | h |
| 0.62279775644811  | -10.96312751528420 | 18.55766700582003 | h |
| -1.93201960838765 | -8.87229032824455  | 17.70012825109408 | h |
| -0.15192471134853 | -11.45547445700214 | 14.12396739270051 | h |

\$user-defined bonds

\$end

\*\*\*\*\*

[Lu-Motex.6H\_20]^{2+}:

input coordinates and input keywords

Energy: -3390.802139063

\$symmetry c1

\$dft

functional b-p

gridsize 5

\$coord

|                    |                   |                   |    |
|--------------------|-------------------|-------------------|----|
| 2.27560390382196   | 0.89728370608308  | 6.37835706461874  | c  |
| -0.44986864949750  | 1.29801884627101  | 6.71583661500006  | c  |
| -0.99703381741290  | 1.59523386681476  | 9.22322457143331  | n  |
| 1.22778340926814   | 1.38269104766023  | 10.50608895192495 | c  |
| 3.32598099968100   | 0.91871065798008  | 8.79122587939197  | c  |
| -2.29987431261057  | 1.36475446798487  | 4.81281374200007  | c  |
| -4.93107611678643  | 1.81740795151757  | 5.01577626653568  | c  |
| -6.26406592261410  | 2.38609906974743  | 7.18851128514486  | n  |
| -8.73425283364654  | 2.75565615135133  | 6.41527112152204  | c  |
| -8.99114820627667  | 2.38250496864118  | 3.68002928641045  | c  |
| -6.59613831710507  | 1.79829423514676  | 2.79772988270918  | c  |
| -10.80865146061974 | 3.45294725263580  | 7.94688592091701  | c  |
| -10.88254770811833 | 3.99421548140682  | 10.55066735885315 | c  |
| -8.79089104855131  | 3.94757797627074  | 12.06914284438726 | n  |
| -9.55123932039233  | 4.65024079107014  | 14.43564233635029 | c  |
| -12.24769694516715 | 5.17329211218778  | 14.49308781006642 | c  |
| -13.11278585521523 | 4.70514247091309  | 12.03712329437941 | c  |
| -7.76912656523490  | 4.66968578289897  | 16.46272344180312 | c  |
| -5.42456480759107  | 3.91251599063823  | 15.94941592969913 | n  |
| -4.64161144411589  | 2.52126351360787  | 11.54240039394315 | lu |
| -5.63445774880475  | -1.40551559725500 | 12.44722391022430 | o  |
| -15.80846847793251 | 4.72983617775324  | 11.11797108357572 | c  |
| -17.35495624716430 | 2.33514824899335  | 11.84836124872850 | c  |
| -16.07283715146681 | -0.18692228150013 | 11.23782046844015 | c  |
| -14.02297515442439 | -0.74085402947468 | 12.94315826286103 | o  |

|                    |                    |                   |   |
|--------------------|--------------------|-------------------|---|
| -13.75923016031905 | 5.97844452862675   | 16.75307564809037 | c |
| -5.82311821653537  | 1.17186153397179   | 0.13111369277556  | c |
| -5.66270545423296  | -1.69120736876872  | -0.41502789760585 | c |
| -11.40694789457340 | 2.56111524600962   | 2.18605262184651  | c |
| -13.05908309972503 | 0.15757161876136   | 2.29949821753415  | c |
| 1.23971892901746   | 1.69022544034870   | 13.18218880799351 | c |
| -0.91216170401029  | 2.25061679490352   | 14.34229330697165 | n |
| -1.15320816127662  | 2.66995822470929   | 16.89599732478034 | c |
| -3.56312112055722  | 3.66599156559981   | 17.75440128669099 | c |
| -3.88049305709377  | 4.28839552889630   | 20.34604941034338 | c |
| -1.94302013989449  | 3.88310195165133   | 22.08171601979007 | c |
| 0.42843192265050   | 2.73880552826372   | 21.24918561240820 | c |
| 0.77677943559268   | 2.19162107987744   | 18.69881811716711 | c |
| 2.09837308477394   | 2.35719798624579   | 23.11974352800340 | o |
| 4.33315126339528   | 0.85499667139622   | 22.77932559606695 | c |
| 3.81256974067539   | -1.90491279086846  | 23.41434981661541 | c |
| 2.03835050501892   | -2.89235969859583  | 21.68008939532454 | o |
| 1.03269320707491   | -5.27151615040314  | 22.39279547733931 | c |
| -1.14644613559775  | -5.95250432172699  | 20.63399979755163 | c |
| -0.37034450867790  | -6.50135832625627  | 18.10419074761339 | o |
| 0.17278462995875   | -9.10694646462349  | 17.65094174115804 | c |
| 1.10554066453848   | -9.54489058040236  | 14.96902533654211 | c |
| -0.89966542079054  | -9.28260791752892  | 13.18573858841624 | o |
| -0.28437213984392  | -10.25113700644456 | 10.74972789039227 | c |
| -2.02767917978926  | 4.34569828688875   | 24.56816111715546 | o |
| -4.27364274716772  | 5.21193485701309   | 25.84467606940316 | c |
| -4.25519414565401  | 8.05135663717323   | 26.30035836232976 | c |
| -4.99175326777310  | 9.36207936711354   | 24.07398486400163 | o |
| -5.09147469098119  | 12.04941897826505  | 24.35494715779054 | c |
| -7.19191077471951  | 13.08009920662630  | 22.68827007522581 | c |
| -9.50078343609543  | 12.11078064843929  | 23.62918205961741 | o |
| -11.66417275329519 | 12.77172471293950  | 22.20060639774564 | c |
| -13.97587864059330 | 11.55237293056661  | 23.38856825124340 | c |
| -13.90879933357131 | 8.88198502277185   | 23.04170884281564 | o |
| -15.89330231456304 | 7.59606200834196   | 24.31857608417416 | c |
| 6.04213957364336   | 0.57927851742626   | 9.53676711681078  | c |
| 3.63866344467674   | 0.62319727956484   | 3.89830731212942  | c |
| 5.01484310784592   | 3.02929075366039   | 2.94200475576952  | c |
| 3.34911133791856   | 5.35598882748367   | 2.51728113435422  | c |
| 2.40215394534375   | 6.43506177914110   | 4.82880664281631  | o |
| -3.45554353858651  | 6.64537639491810   | 10.73082138824759 | o |
| -9.96301214971830  | -3.51702646095240  | 11.65458393657265 | o |
| -2.27684603727390  | 7.78488133408058   | 6.21614907074970  | o |
| -9.23229127001765  | 6.74507463319958   | 21.97900775521274 | o |
| -1.62109599104060  | 1.01785145779281   | 2.87665154691426  | h |
| 3.05309933993122   | 1.53064358801569   | 14.21282135615028 | h |
| 2.52290422895146   | 1.26094161151957   | 18.08460103437128 | h |
| -5.67362616361201  | 5.12167845510823   | 20.98024091622194 | h |
| -8.38679765438356  | 5.26535213709279   | 18.38336681515040 | h |
| -12.61687677834191 | 3.64046085334063   | 6.93547457412902  | h |
| -10.94055583395593 | 2.96605406472366   | 0.17759721837893  | h |
| -12.53606752332955 | 4.21316996742385   | 2.83734216656989  | h |
| -14.78897568559261 | 0.39679814407147   | 1.13237391231804  | h |
| -12.01847279811042 | -1.51611979169024  | 1.57250977825384  | h |
| -13.66460733384952 | -0.27625453699775  | 4.26677156227500  | h |
| -3.96965501040797  | 2.06532113579298   | -0.31479796638077 | h |
| -7.19316175352310  | 2.04333948624798   | -1.20298041174142 | h |
| -5.10241267141305  | -2.03084174580519  | -2.41088904407215 | h |
| -4.25530033350803  | -2.64033772800692  | 0.82515634689307  | h |
| -7.51659904581471  | -2.62686052615653  | -0.09964790060717 | h |

|                    |                    |                   |   |
|--------------------|--------------------|-------------------|---|
| 6.93478411217369   | 2.39471288335055   | 10.12583408629522 | h |
| 6.24641414494767   | -0.75078454088462  | 11.15255394843314 | h |
| 7.18760193676119   | -0.18554089761851  | 7.95384367999923  | h |
| -4.21885737008662  | 4.23749482629898   | 27.70097605086081 | h |
| -6.02112207289695  | 4.64839834321547   | 24.82308269945686 | h |
| -2.33102685996757  | 8.65024091628171   | 26.93110815725585 | h |
| -5.60550218502418  | 8.46534787637502   | 27.87465390960226 | h |
| -15.84711433993051 | 4.94900399487426   | 9.02802072459877  | h |
| -16.80647680491296 | 6.41378904897231   | 11.88852156697507 | h |
| -19.20319364160746 | 2.41444064531348   | 10.84783800839759 | h |
| -17.80198504087176 | 2.35892190257199   | 13.90488952659792 | h |
| -17.44049443576010 | -1.76617021226481  | 11.43812459816373 | h |
| -13.22015135997234 | 0.88428284156011   | 13.38686063509674 | h |
| -12.55981529687964 | 6.81911834464346   | 18.25347864597869 | h |
| -15.22701911684239 | 7.38603222046712   | 16.22197695085742 | h |
| -14.77003868197884 | 4.34922020449426   | 17.62649767151351 | h |
| -5.51339019699054  | 12.55456865548750  | 26.35756351256314 | h |
| -3.24117865896972  | 12.91564752679138  | 23.82829006427215 | h |
| -7.15585474928243  | 15.19519915382535  | 22.74656130990407 | h |
| -6.88736319946479  | 12.48807596671319  | 20.67777575408899 | h |
| -11.94795534670479 | 14.86841986802782  | 22.18722041178478 | h |
| -11.46315474511324 | 12.14352853925856  | 20.18900089660395 | h |
| 2.69014911209277   | -8.21971187382815  | 14.51619311151029 | h |
| -1.96800387661334  | -9.97326494640473  | 9.53220719409268  | h |
| 1.36771732505020   | -9.24695702883530  | 9.89962371274069  | h |
| 0.15152702703023   | -12.31202384399844 | 10.85043854846497 | h |
| -15.71798194894020 | 12.35237130742216  | 22.49951018080210 | h |
| -14.02478199085020 | 12.02075939023985  | 25.44798590676693 | h |
| -15.65592293572841 | 5.54879106419832   | 23.93503031223727 | h |
| -15.81112073505515 | 7.92237488157640   | 26.40266007382276 | h |
| -17.78316531879303 | 8.21740449443614   | 23.61338117350232 | h |
| -8.07425146582287  | 8.02908045452229   | 22.71067622875278 | h |
| -10.94431329502623 | 7.34135286105960   | 22.49724296361287 | h |
| -7.36964489862203  | -2.26448310255548  | 12.16792118969518 | h |
| -4.26871940646613  | -2.70584827220106  | 13.04206830213217 | h |
| -10.22732724189404 | -4.14337710073629  | 9.93216496002809  | h |
| -11.57824466705329 | -2.62543478410464  | 12.16828225049770 | h |
| -15.38192337844655 | -0.19756905784320  | 9.23728454613446  | h |
| -2.91558008032819  | 7.16182769173088   | 8.88498944336743  | h |
| -4.02719731458060  | 8.16424858561087   | 11.61868029035743 | h |
| -0.51711433322183  | 7.32541754746585   | 5.62955149297786  | h |
| -3.45430496892843  | 6.96523264215721   | 5.04053748565275  | h |
| 3.80684146925481   | 7.17412826907835   | 5.78869749708069  | h |
| 4.40344939485658   | 6.81600956275737   | 1.42318491532952  | h |
| 1.64031822338468   | 4.86479704642008   | 1.39804320325812  | h |
| 5.95267043719685   | 2.56638010479465   | 1.11485170540892  | h |
| 6.57365212903870   | 3.53953791934856   | 4.26633602541169  | h |
| 5.07290540952962   | -0.90801062505612  | 4.05909291213536  | h |
| 2.30147431374639   | -0.02061380502046  | 2.40827969777213  | h |
| -2.00869854541470  | -4.30810819803318  | 13.73532391199613 | o |
| -1.89026929467820  | -6.08677793224355  | 13.09683658340258 | h |
| -1.53622819297188  | -4.57143448797345  | 15.54057660206260 | h |
| 5.11906375676416   | 1.07364550276522   | 20.84413068588693 | h |
| 5.72759170593864   | 1.62836153312561   | 24.14041138483828 | h |
| 5.64590545495995   | -2.96650665945345  | 23.36093357974994 | h |
| 3.07089528589764   | -2.02274210032039  | 25.39190769667369 | h |
| 0.28588886798316   | -5.19831098532715  | 24.37324823414017 | h |
| 2.53048519251331   | -6.76706318985674  | 22.35353393499841 | h |
| -2.21386896270544  | -7.58222383110945  | 21.43976886860104 | h |
| -2.45645681669929  | -4.31430093806989  | 20.51691021997445 | h |

```

1.68283994039111      -9.77431809690897      18.96592281209113      h
-1.55061266514227     -10.28055329187990     17.99007353933748      h
1.86653156847024     -11.51154323569241     14.87924479039921      h
$user-defined bonds
$end

```

\*\*\*\*\*

The input coordinates given below are for the optimized structures for basis sets B (cf. text).

La-Motex<sup>{2+}</sup>:

input coordinates and input keywords

Energy: -2927.345224264

\$symmetry c1

\$dft

functional b-p

gridsize 5

\$coord

```

-0.91244550955021      0.26214185705453      7.56343363058542      c
-0.25583879951087      0.01890480805959      4.98704741408149      c
2.37506384182956      -0.18860729512564      4.29633996925854      c
4.23379735324443      -0.13592040117262      6.21100197109045      c
3.57363252696316      0.08129600700722      8.73995796526379      c
0.92256359389187      0.28094380914965      9.43721556153706      c
-1.96140813062471      0.02176797404622      3.02009291649578      n
-4.40961712752685      0.55513588677047      3.26764261463211      c
-5.93819896237545      0.58918760208579      1.08668705364353      c
-4.85418978597928      0.11463862716603      -1.23537100865968      n
-6.77482474714232      0.22784488220360      -2.97316173098298      c
-9.15802566356284      0.79003324806744      -1.71414093001464      c
-8.61260695437000      1.03919714619846      0.84207067235084      c
-6.43162633322790      -0.13067283039059      -5.57308075468462      c
-4.17778617266030      -0.50141378174172      -6.91775046134924      c
-1.76762115624303      -0.69867684912430      -5.90231127745952      n
-0.15750997059101      -0.80751591483623      -7.96978044341365      c
-1.58289810046679      -0.80113585528616      -10.32528468782223      c
-4.09745609148193      -0.60644282035623      -9.66821247894052      c
2.49105156592634      -0.80018315691462      -7.91516941445606      c
4.12506327514564      -0.58400238201848      -5.84307637505006      c
6.87006472948429      -0.40683492869197      -5.92906148844799      c
7.68362162197699      -0.22758641047438      -3.43512683193949      c
5.44070653004949      -0.30238967726449      -1.90265812711348      c
3.30524075116085      -0.50798741867501      -3.38328086958029      n
8.49722085141597      -0.41426207113378      -8.24656814259153      c
9.60397907371055      2.19155505259150      -8.98559824739540      c
7.59207562625959      4.14436142762586      -9.68590503677247      c
8.63261232924593      6.41018045416270      -10.69101726114100      o
-0.64686904294451      -1.70763634380940      -1.37727208831699      la
2.88244621275655      -0.36191854863725      1.74796179737694      n
5.18745522316043      -0.21352533308460      0.74851658077736      c
10.34006942188035     -0.02358532551968      -2.49260688775824      c
-6.33479888065767     -0.45262181436976     -11.39736035625716     c
-7.15235856982797     2.27407379502179     -12.01922160427419     c
-0.47125218444480     -0.91626468733959     -12.92810080329710     c
0.40380638567826      1.66713759478844     -13.95269405280439     c
-10.38702505304517     1.64576594549949     2.95589825657648      c
-11.64315645334334     1.07147717011388     -3.01952760513502      c

```

|                    |                   |                    |   |
|--------------------|-------------------|--------------------|---|
| -12.02950315101685 | 3.69501678017335  | -4.25675400727639  | c |
| -14.19256214796721 | 3.67801438177257  | -6.15183760532297  | c |
| -13.51430109200985 | 1.95230560268782  | -8.13361447473866  | o |
| 5.17183210315920   | 0.11032963762348  | 10.68506033184215  | o |
| 7.86722897134314   | -0.07915658907525 | 10.21990024652044  | c |
| 9.19663593265788   | -0.26964201868868 | 12.73890555739421  | c |
| 8.76843678567427   | -2.70778360051208 | 13.73945541945915  | o |
| 9.94360456815370   | -3.05662006002588 | 16.14982203014255  | c |
| 9.40439533901788   | -5.74585321657966 | 17.00719546662121  | c |
| 10.60551966729024  | -6.06267042834319 | 19.37856685596491  | o |
| 10.30618098321130  | -8.54618224010178 | 20.38001290673170  | c |
| 0.50484651137364   | 0.45021444350051  | 11.91398052840392  | o |
| -2.06602905648869  | 0.63288317694778  | 12.84727867820578  | c |
| -1.99495216072513  | 0.41530880644267  | 15.69467259757254  | c |
| -1.44903083956330  | -2.13245389453517 | 16.30567664069762  | o |
| -0.84364949202520  | -2.56654969169065 | 18.90803727241070  | c |
| -3.19042924399159  | -2.74522483942607 | 20.58109271627471  | c |
| -2.34490635769048  | -3.35973721719496 | 23.04667122667085  | o |
| -4.37329459173454  | -3.63750395152324 | 24.80204319169885  | c |
| -8.13947829851656  | -0.01948599442086 | -6.72291036731252  | h |
| -5.25839682866375  | 1.01776056569269  | 5.09601789734680   | h |
| -2.88871659489618  | 0.40194386756101  | 8.10579297391701   | h |
| 6.21982826223043   | -0.30302612889504 | 5.71393713689472   | h |
| 6.88034759944187   | 0.03204071705907  | 1.91100427358616   | h |
| 3.39665622492847   | -0.89358077519765 | -9.76220575882104  | h |
| -1.88790708205734  | -1.71524217829211 | -14.22319009994661 | h |
| 1.12756320322550   | -2.24947242678519 | -12.95367452677828 | h |
| 1.18853618800723   | 1.45803703120926  | -15.86159865649443 | h |
| -1.17483097163265  | 3.00897397511514  | -14.05148096916986 | h |
| 1.86427820065399   | 2.51448627614110  | -12.74352409306970 | h |
| -7.94550747089029  | -1.47727857890640 | -10.56994546769086 | h |
| -5.87761833269714  | -1.44716968263782 | -13.16537659723487 | h |
| -8.77307500624373  | 2.25687384192163  | -13.31296709695533 | h |
| -7.71824167126260  | 3.30459889241211  | -10.30925404564434 | h |
| -5.61431587077414  | 3.33232925243081  | -12.92452476442927 | h |
| -13.18922522155463 | 0.71246480825579  | -1.67620115548069  | h |
| -11.81925120988324 | -0.36579161419741 | -4.51285668120262  | h |
| -10.29211471457403 | 4.27307058855577  | -5.24652010183197  | h |
| -12.39489662540670 | 5.13384699963836  | -2.80116557715254  | h |
| -14.47253710590821 | 5.60250687988296  | -6.90735851959429  | h |
| -15.96918497490667 | 3.08287445271779  | -5.22777815646897  | h |
| -14.93785447808536 | 1.79631520086034  | -9.28368610497667  | h |
| -12.35630719248294 | 1.63089327634780  | 2.31134505385758   | h |
| -10.23071008974973 | 0.27803340743487  | 4.51355385838887   | h |
| -10.00981447099454 | 3.53307041966345  | 3.74652026156651   | h |
| -3.19785836054934  | -0.92543762515167 | 12.05716126021124  | h |
| -2.86747008325030  | 2.46425024502061  | 12.26216929300711  | h |
| -3.85753240844670  | 1.02677804722264  | 16.42727742464617  | h |
| -0.54773384737775  | 1.70766181183301  | 16.47542748927873  | h |
| 8.49178997649422   | 1.61741127565580  | 9.18537851823613   | h |
| 8.25204929494036   | -1.78513323652555 | 9.09029395600475   | h |
| 8.49811384022992   | 1.22237734275633  | 14.02953613033781  | h |
| 11.24000410024596  | 0.07329891001587  | 12.42490364561623  | h |
| 7.43749268576186   | -1.17965581938388 | -9.86439381548483  | h |
| 10.08275097677170  | -1.72894908226392 | -7.93894317453026  | h |
| 10.87291111743983  | 1.93217187466103  | -10.61206447278313 | h |
| 10.77202023543666  | 2.92283168492892  | -7.42257612612248  | h |
| 6.35765250278746   | 4.54184108517676  | -8.04171658030725  | h |
| 6.37831099957473   | 3.39169245690822  | -11.20026118276335 | h |
| 9.65669311961013   | 7.21946420389797  | -9.39568865142791  | h |

|                   |                    |                   |   |
|-------------------|--------------------|-------------------|---|
| 11.69156090734465 | -0.69410653385085  | -3.91550735705146 | h |
| 10.84538388246453 | 1.94529833987158   | -2.04500173412737 | h |
| 10.63857669345772 | -1.14444994433676  | -0.76970904405753 | h |
| 0.17317002731123  | -4.37500719908986  | 18.96079960035856 | h |
| 0.43530198639282  | -1.07894106996803  | 19.62198008054036 | h |
| -4.24557414690090 | -0.93448221302638  | 20.60126684141773 | h |
| -4.47568764995017 | -4.22012083400608  | 19.83585083867722 | h |
| -3.23660354291680 | -4.34132528785591  | 27.34598132595290 | c |
| -5.45259014595361 | -1.85509773021648  | 24.97063173691622 | h |
| -5.69132506617197 | -5.13325938122169  | 24.17398873108550 | h |
| 12.00690752637572 | -2.75846624718941  | 16.01109428041284 | h |
| 9.18378637556925  | -1.69360596859719  | 17.53878532675967 | h |
| 7.33753571293462  | -6.05030534959766  | 17.15464204076625 | h |
| 10.14950596257604 | -7.10603397484019  | 15.60239901762910 | h |
| 11.88472485776039 | -8.80026527128680  | 22.74639745942878 | c |
| 8.29533963805012  | -8.90191675603746  | 20.84224213845367 | h |
| 10.91460492195182 | -9.97292443303209  | 18.97769230473773 | h |
| -5.26850203098167 | -4.63299562873676  | 29.06803281928300 | o |
| -2.14106204660643 | -6.11709916442912  | 27.17671829263085 | h |
| -1.92182867181658 | -2.84516501059533  | 27.98938680215057 | h |
| -4.44851924246716 | -5.28213575699859  | 31.54479863064666 | c |
| -6.14544558492363 | -5.46313168550745  | 32.71763838923363 | h |
| -3.40916797522441 | -7.09384041657560  | 31.54372181683535 | h |
| -3.20875479869643 | -3.80209853207630  | 32.34134310992295 | h |
| 11.28817774290582 | -10.51491959686222 | 23.79193087430148 | h |
| 14.47239130370678 | -8.97899387976668  | 22.06104810502218 | o |
| 11.56682491440474 | -7.15064781193243  | 23.99523160673132 | h |
| 16.09657403270136 | -9.17123057372876  | 24.19354380160568 | c |
| 18.03289369945671 | -9.30769009749280  | 23.47257612686633 | h |
| 15.92987327849503 | -7.49151065321021  | 25.42358338828686 | h |
| 15.65968265030288 | -10.87079040540070 | 25.32764815785710 | h |

\$user-defined bonds  
\$end

Gd-Motex<sup>{2+}</sup>:  
input coordinates and input keywords  
Energy: -2931.659381771  
\$symmetry c1  
\$dft  
functional b-p  
gridsize 5

|                   |                   |                   |   |
|-------------------|-------------------|-------------------|---|
| \$coord           |                   |                   |   |
| -0.89252490876328 | 0.44377142868909  | 7.55721143647771  | c |
| -0.23444726720696 | 0.24677590445747  | 4.97824875064356  | c |
| 2.39168436747091  | 0.05601466529124  | 4.28346278939459  | c |
| 4.25360732078152  | 0.07843136658754  | 6.19477459550661  | c |
| 3.59506874812091  | 0.25171908432603  | 8.72756585180628  | c |
| 0.94366035292248  | 0.43405447063559  | 9.42966330956648  | c |
| -1.93678889688065 | 0.25691072597761  | 3.00722524008545  | n |
| -4.41046790686260 | 0.65923525013415  | 3.29306724656097  | c |
| -5.94968751258246 | 0.68861487388593  | 1.12592503521915  | c |
| -4.84583822765659 | 0.32797332774415  | -1.20856128703600 | n |
| -6.78106111157624 | 0.36993345586182  | -2.93437665897790 | c |
| -9.18283955032673 | 0.77906514599792  | -1.66379667506803 | c |
| -8.64409616780086 | 0.99655902541828  | 0.89875706612189  | c |
| -6.42293204638629 | 0.03469581388948  | -5.53229183672807 | c |
| -4.15649702224817 | -0.30429817926016 | -6.85672365651204 | c |
| -1.73804242232692 | -0.44770396558962 | -5.83360568633023 | n |
| -0.13949051852649 | -0.62531242978476 | -7.91484187405645 | c |

|                    |                   |                    |    |
|--------------------|-------------------|--------------------|----|
| -1.573210011111107 | -0.69309421378919 | -10.26067555151174 | c  |
| -4.08444659246689  | -0.48508440580040 | -9.59982673777941  | c  |
| 2.50579189271219   | -0.65695658237074 | -7.88927536361338  | c  |
| 4.15255082235886   | -0.44873634576154 | -5.82970104856741  | c  |
| 6.89715969654966   | -0.41083145301755 | -5.91544967845891  | c  |
| 7.71685261778284   | -0.22984916865298 | -3.42101313588101  | c  |
| 5.47141264664991   | -0.16606186835458 | -1.89508445201554  | c  |
| 3.32779691103287   | -0.28423562800021 | -3.37475394026118  | n  |
| 8.52286199045230   | -0.56534631408840 | -8.22854362432484  | c  |
| 9.77385060479613   | 1.95489849561397  | -9.02955387915111  | c  |
| 7.87546527375075   | 3.98920745960164  | -9.81114209635793  | c  |
| 9.04382456003513   | 6.16046518909446  | -10.88117745916372 | o  |
| -0.58631573925522  | -0.84452629055551 | -1.38641929879918  | gd |
| 2.88684215149988   | -0.09939910957273 | 1.73047021111483   | n  |
| 5.20846801777533   | -0.06174283435409 | 0.74932871802040   | c  |
| 10.37790749830168  | -0.15007932015222 | -2.47513565077577  | c  |
| -6.33017762993857  | -0.39328533066291 | -11.32153669299555 | c  |
| -7.18899866960446  | 2.31269291594435  | -11.97895756802363 | c  |
| -0.47438131955953  | -0.90083055100269 | -12.86307406870835 | c  |
| 0.40187613643064   | 1.64230962113785  | -13.98331028767764 | c  |
| -10.44579739002288 | 1.44050097120402  | 3.02880521808009   | c  |
| -11.68439751247257 | 0.94147960272574  | -2.95776963242383  | c  |
| -12.21630780340639 | 3.55529332348813  | -4.16105263151608  | c  |
| -14.37083170546362 | 3.43931562453523  | -6.06244716502823  | c  |
| -13.58995100028520 | 1.77918184519009  | -8.06232801902267  | o  |
| 5.19512857278109   | 0.25531138266183  | 10.67080001886115  | o  |
| 7.88958028637497   | 0.05683166489308  | 10.20180090068137  | c  |
| 9.21951060206577   | -0.16820290740336 | 12.71772464374770  | c  |
| 8.75958504091247   | -2.60676599260945 | 13.70234167061920  | o  |
| 9.91477229204580   | -2.98244119543248 | 16.11839710096659  | c  |
| 9.30936238348965   | -5.65888047602545 | 16.97176068121069  | c  |
| 10.49244791378230  | -6.00612691874407 | 19.34810684893220  | o  |
| 10.11663889513280  | -8.47914659694748 | 20.34965190751416  | c  |
| 0.52523617084379   | 0.56432178313436  | 11.90835704058003  | o  |
| -2.04815779575595  | 0.71296494868912  | 12.84136804641252  | c  |
| -1.97941353860690  | 0.45237581178241  | 15.68505698351434  | c  |
| -1.41331085491340  | -2.09981607745675 | 16.25727857673310  | o  |
| -0.79889247882390  | -2.56724613181437 | 18.85137464111015  | c  |
| -3.13901765666875  | -2.78132068757447 | 20.52972834271943  | c  |
| -2.27857742310883  | -3.42107754590470 | 22.98361850219501  | o  |
| -4.29517292014461  | -3.74285217468662 | 24.74520429675159  | c  |
| -8.12791908742122  | 0.08960295313416  | -6.68960667276055  | h  |
| -5.26623561973267  | 0.99274656673032  | 5.14440021643123   | h  |
| -2.86675990319682  | 0.57653117617435  | 8.10632970075577   | h  |
| 6.24053314611322   | -0.07008317093881 | 5.69747021974530   | h  |
| 6.90079769885977   | 0.07653646139151  | 1.92737544892849   | h  |
| 3.39292227941574   | -0.81681461323808 | -9.74031942476515  | h  |
| -1.89944811781730  | -1.74132505233097 | -14.12163298379151 | h  |
| 1.12030339333713   | -2.23902179593277 | -12.85021797531425 | h  |
| 1.18021212198045   | 1.36067285034237  | -15.88556038947442 | h  |
| -1.17504745173296  | 2.98210842137683  | -14.12789366529985 | h  |
| 1.86841996384348   | 2.53102831406351  | -12.81176191067057 | h  |
| -7.92182889923585  | -1.42888430358817 | -10.47121522805111 | h  |
| -5.86634382121119  | -1.40709037620558 | -13.07631381949775 | h  |
| -8.81970147881051  | 2.25368993304568  | -13.25879745334146 | h  |
| -7.75408310937285  | 3.36320802605730  | -10.28080494663123 | h  |
| -5.67247193055769  | 3.37636051410346  | -12.91382241734784 | h  |
| -13.20401923158137 | 0.48078939365105  | -1.61571746806548  | h  |
| -11.78555478004994 | -0.48394651293337 | -4.46936291131036  | h  |
| -10.51306474041924 | 4.24397865574392  | -5.13941349924426  | h  |



|                    |                    |                    |   |
|--------------------|--------------------|--------------------|---|
| -12.66607375013695 | 4.95183584825400   | -2.68799697319191  | h |
| -14.75727138742584 | 5.35410210990229   | -6.79520424102379  | h |
| -16.11319975968475 | 2.73351510401466   | -5.15119807164546  | h |
| -14.99986850980299 | 1.55323734121368   | -9.21766368886807  | h |
| -12.41088598607161 | 1.38239150297090   | 2.37472766863922   | h |
| -10.24298336437687 | 0.00843929429626   | 4.52219767506776   | h |
| -10.13995574546610 | 3.30142704413188   | 3.90740313509359   | h |
| -3.16525093385516  | -0.84279398976970  | 12.02553012640690  | h |
| -2.86430710858966  | 2.54602472323215   | 12.28262349110792  | h |
| -3.84841665942076  | 1.03652696668807   | 16.42351595386042  | h |
| -0.54457896732073  | 1.74486383228497   | 16.48815566295731  | h |
| 8.52455842122205   | 1.76067132729781   | 9.18571876604619   | h |
| 8.26242155731396   | -1.63918142156113  | 9.05321234601079   | h |
| 8.54284945942345   | 1.32407636495168   | 14.01967590725639  | h |
| 11.26653636524260  | 0.15030893910571   | 12.40119491135865  | h |
| 7.42228745639178   | -1.30920394293548  | -9.82924702775765  | h |
| 10.03114131775378  | -1.95960995079981  | -7.88539876309023  | h |
| 11.04266016799009  | 1.58027297481387   | -10.63347028688338 | h |
| 10.96430776744134  | 2.66953344215630   | -7.47577334447863  | h |
| 6.65296610946476   | 4.50712777742030   | -8.19132008980622  | h |
| 6.63342332811752   | 3.25315216589960   | -11.31070538412085 | h |
| 10.10439404509407  | 6.95489718794155   | -9.60630848122526  | h |
| 11.69228768678882  | -0.94840071555565  | -3.86648130229953  | h |
| 10.99498412488133  | 1.80149565374974   | -2.09641268412700  | h |
| 10.60568675661643  | -1.22167667140233  | -0.71090885261635  | h |
| 0.22677442915933   | -4.37126815242442  | 18.87603620469912  | h |
| 0.47495710595436   | -1.08347045580237  | 19.58233443131473  | h |
| -4.20518362732247  | -0.97755232539565  | 20.57722827053087  | h |
| -4.41781498365793  | -4.25481708636302  | 19.77087576820002  | h |
| -3.13095449727736  | -4.44530869812107  | 27.27714988754306  | c |
| -5.40124800438126  | -1.97875126253824  | 24.93134001098226  | h |
| -5.59259551803921  | -5.25448132545397  | 24.11231406649713  | h |
| 11.98493401591123  | -2.73096411355476  | 15.99077712610711  | h |
| 9.17837687353807   | -1.60292866096883  | 17.50372044555543  | h |
| 7.23532161309837   | -5.91460768644822  | 17.11079082139289  | h |
| 10.02765873909117  | -7.03571048967505  | 15.56920281915585  | h |
| 11.66936440078747  | -8.77775040265413  | 22.72797490602207  | c |
| 8.09324275105195   | -8.77650489231850  | 20.79836285683974  | h |
| 10.69297288870824  | -9.92363488627884  | 18.95203854769888  | h |
| -5.14249337332446  | -4.78080870178379  | 29.01472676984399  | o |
| -2.00831972897994  | -6.20208266060709  | 27.08787018371322  | h |
| -1.83502554193267  | -2.93222473942250  | 27.91921598457983  | h |
| -4.28724900682020  | -5.41719848407961  | 31.48311515169801  | c |
| -5.96881252020035  | -5.63518393646624  | 32.67161044945607  | h |
| -3.21038905648126  | -7.20681756441379  | 31.46959198622051  | h |
| -3.07088664308244  | -3.91300001802384  | 32.27040421503876  | h |
| 11.01206347018528  | -10.47194012176227 | 23.77046259077856  | h |
| 14.25574771070823  | -9.03761212657752  | 22.06401941787763  | o |
| 11.39224094762630  | -7.11728330041693  | 23.97219114507884  | h |
| 15.85416759747671  | -9.29861662827506  | 24.20896840328819  | c |
| 17.79067986709098  | -9.49658062325161  | 23.50296086423547  | h |
| 15.73464370352934  | -7.62239949021686  | 25.44922388837963  | h |
| 15.34968616975835  | -10.98970428315289 | 25.32772639231217  | h |

\$user-defined bonds

\$end

Lu-Motex^{2+}:

input coordinates and input keywords

Energy: -2935.745519236

\$symmetry c1

\$dft

functional b-p

gridsize 5

\$coord

|                    |                   |                    |    |
|--------------------|-------------------|--------------------|----|
| 2.39476652392991   | 0.31423426238442  | 4.24769661341074   | c  |
| -0.23848366015384  | 0.61996044229819  | 4.95400325436018   | c  |
| -0.48770098590589  | 0.73631872854108  | 7.53478264962036   | n  |
| 1.93191436461343   | 0.50709042214425  | 8.48213566345481   | c  |
| 3.76093083583007   | 0.23494448147628  | 6.49008420045259   | c  |
| -2.28366997948067  | 0.79044834078336  | 3.29780343786996   | c  |
| -4.83589255826906  | 1.10923186780261  | 3.89400254619078   | c  |
| -5.88585518843541  | 1.37530145797749  | 6.29737773694296   | n  |
| -8.46076246065595  | 1.71195083982016  | 5.84068048636624   | c  |
| -9.02301815504083  | 1.63723747820222  | 3.15229367813528   | c  |
| -6.75666477001452  | 1.25092231443456  | 1.93460755352592   | c  |
| -10.35867002947978 | 2.10662533464382  | 7.63078948386988   | c  |
| -10.13794477141523 | 2.21124230215935  | 10.25763995442881  | c  |
| -7.86542385927551  | 1.93488900197033  | 11.48504147266218  | n  |
| -8.40331791330586  | 2.19650596118846  | 14.02416611978790  | c  |
| -11.04621615509101 | 2.64063962335081  | 14.43848556289461  | c  |
| -12.16190742770898 | 2.64179357228978  | 12.05518120199493  | c  |
| -6.41379265295287  | 2.02511119821341  | 15.76609359251528  | c  |
| -4.09173706280360  | 1.60548247351689  | 14.87839646256430  | n  |
| -3.76874167333545  | 1.28248235410213  | 10.28256480111835  | lu |
| -14.90249195193925 | 3.03965190278091  | 11.46494316785941  | c  |
| -16.63842720982930 | 0.76630080599203  | 12.07877226074241  | c  |
| -16.04223277164875 | -1.59472404285287 | 10.52223972783721  | c  |
| -17.86348664703936 | -3.54649624182405 | 10.83254334960392  | o  |
| -12.30366769597859 | 3.03126262511861  | 16.93657191769757  | c  |
| -6.30792142311914  | 0.96670998182711  | -0.84562650069382  | c  |
| -6.20173675770026  | -1.81218719545617 | -1.71673720970076  | c  |
| -11.59193446573165 | 1.90074954171026  | 1.99059005851822   | c  |
| -13.12830861659351 | -0.57514074983628 | 1.96919192186329   | c  |
| 2.27268076046858   | 0.58972779826442  | 11.10726969383543  | c  |
| 0.23236765374816   | 0.89333047797687  | 12.55970022802879  | n  |
| 0.35932298121809   | 1.01331351256733  | 15.15678663116680  | c  |
| -2.00821673265776  | 1.40129601212129  | 16.42679928189646  | c  |
| -2.05899103052512  | 1.55377743019097  | 19.09030725230029  | c  |
| 0.14686436785178   | 1.36029540153441  | 20.49487998688886  | c  |
| 2.54661339045689   | 0.97957475240124  | 19.208274993926197 | c  |
| 2.59886365530846   | 0.79964561367334  | 16.59292671446032  | c  |
| 4.53906756014222   | 0.83321102216431  | 20.73855574294358  | o  |
| 7.04291021639799   | 0.49124239421716  | 19.67593155556504  | c  |
| 8.94862659226409   | 0.78791123540684  | 21.78271276134140  | c  |
| 9.05339063299001   | 3.38187799443206  | 22.43114622085824  | o  |
| 10.38752170721139  | 3.91859164256249  | 24.72407199089514  | c  |
| 13.25171008208549  | 3.96088751035795  | 24.36218750595840  | c  |
| 14.32179878229876  | 4.66235458632472  | 26.71453179516025  | o  |
| 17.01204131284232  | 4.82695104602828  | 26.62548331907031  | c  |
| 17.92404090610593  | 5.61177063248028  | 29.23518208254546  | c  |
| 20.59587513661963  | 5.77962810014712  | 29.12453304411835  | o  |
| 21.69104135016790  | 6.48800543343691  | 31.47544768337603  | c  |
| 0.31367099940119   | 1.48776428417667  | 23.00309980174191  | o  |
| -1.95887198751663  | 1.87742800717343  | 24.48677858286429  | c  |
| -1.19762807533617  | 2.20515898707647  | 27.21848670050404  | c  |
| -0.08687775668550  | 4.61571651304606  | 27.50499001788059  | o  |
| 0.74285792416511   | 5.07710444174485  | 30.03721143763191  | c  |
| 1.84375120920347   | 7.73007684322360  | 30.12970973625957  | c  |

|                    |                   |                   |   |
|--------------------|-------------------|-------------------|---|
| 2.66449534092851   | 8.14391940242676  | 32.64402915006577 | o |
| 3.66759441351606   | 10.61558237094989 | 33.02567402483054 | c |
| 4.21350910596104   | 10.98492332260732 | 35.80475067782736 | c |
| 1.89631374910742   | 11.30174940022343 | 37.11929480103257 | o |
| 2.23877945576820   | 11.59344581770787 | 39.76901157215809 | c |
| 6.54803639287910   | -0.06538969968788 | 6.83332101999634  | c |
| 3.33365507899179   | 0.12179747620164  | 1.59465597754966  | c |
| 2.97286356174016   | -2.52966674147837 | 0.40699500381468  | c |
| 3.09301936578775   | -2.44027147296552 | -2.46496860413664 | c |
| 1.01343699600617   | -0.91060868327239 | -3.30699430134386 | o |
| -1.84140073030395  | 0.66355414798109  | 1.28883913875176  | h |
| 4.17325887096295   | 0.41917735529063  | 11.89589446248113 | h |
| 4.40223773797002   | 0.49315117942336  | 15.66093748811724 | h |
| -3.83707298472878  | 1.82838881507713  | 20.07899712284928 | h |
| -6.80152809578709  | 2.24278889968364  | 17.78245528719189 | h |
| -12.25032568042765 | 2.36922903310797  | 6.86377040323669  | h |
| -11.37457795304126 | 2.58217942449050  | 0.03909266995650  | h |
| -12.67037673519755 | 3.38004795615997  | 2.98138197234436  | h |
| -14.97607917401135 | -0.26867749347893 | 1.07720925041550  | h |
| -12.14267031142579 | -2.05905155367993 | 0.90597247489237  | h |
| -13.45169664246278 | -1.29375508227652 | 3.89066864907566  | h |
| -4.54250136038804  | 1.92301431854278  | -1.39005934055848 | h |
| -7.82611428438806  | 1.94784229554149  | -1.87193271847915 | h |
| -5.90072002874286  | -1.90967978990074 | -3.76631779130877 | h |
| -4.64735160179482  | -2.83519705735620 | -0.79773302520624 | h |
| -7.97020348611425  | -2.80457228260924 | -1.27611764257649 | h |
| 5.34348532775938   | 0.64626624629937  | 1.51497499410369  | h |
| 2.32083381901338   | 1.49215011404120  | 0.40148048147178  | h |
| 1.12295732826238   | -3.30855637433292 | 0.95817400774894  | h |
| 4.41304392718925   | -3.84655267852521 | 1.12347200988186  | h |
| 2.94708138435046   | -4.37496922287696 | -3.23113477188887 | h |
| 4.91121920314719   | -1.63012449169920 | -3.09839057578357 | h |
| 1.15333624364970   | -0.68499044657399 | -5.12455855895564 | h |
| 7.53683042073783   | -0.03392314845235 | 5.01306564405726  | h |
| 7.34763657162730   | 1.45412453638090  | 8.00539645397158  | h |
| 7.00887580300525   | -1.87123621860111 | 7.75804038740775  | h |
| 7.37529909178646   | 1.94357825270099  | 18.22166365141900 | h |
| 7.16310796841566   | -1.40746571971261 | 18.82796456071834 | h |
| 10.78605856451842  | 0.06764820961561  | 21.08625332939719 | h |
| 8.38674780272246   | -0.38029108532245 | 23.42397664121539 | h |
| -3.20064273421889  | 0.21991038272458  | 24.26501597246790 | h |
| -2.92976537527206  | 3.59176060893754  | 23.81310475795403 | h |
| 0.12282859368608   | 0.68084584001344  | 27.77799738732468 | h |
| -2.91785032749561  | 2.01587864933898  | 28.40030471446919 | h |
| -15.13882608199586 | 3.54694393781247  | 9.46179602384087  | h |
| -15.57992340543777 | 4.68526206165799  | 12.54689709357537 | h |
| -18.60810076887301 | 1.32277852850822  | 11.71325845736557 | h |
| -16.50890100462324 | 0.31584326763484  | 14.10935349067234 | h |
| -14.11200164251792 | -2.28373212256804 | 10.95637801553015 | h |
| -16.09018470261383 | -1.13221939028077 | 8.49327057379034  | h |
| -17.86721440497574 | -4.08342797663402 | 12.59134313208035 | h |
| -14.07378480357714 | 4.09157534599649  | 16.72414043180143 | h |
| -12.78119871053279 | 1.21837615651517  | 17.84128600958026 | h |
| -11.09644342098133 | 4.08323776177302  | 18.25799811132620 | h |
| 9.74605136720322   | 5.79732014110424  | 25.32888773693320 | h |
| 9.87388180958390   | 2.54490288584634  | 26.21001386825630 | h |
| 13.96754803199604  | 2.08344395885161  | 23.76590850070945 | h |
| 13.75330704596812  | 5.33571861820148  | 22.86538527420311 | h |
| 17.84716721314520  | 2.98309180383581  | 26.10271331305221 | h |
| 17.61783088856949  | 6.23600936954141  | 25.20538123137034 | h |

|                   |                   |                   |   |
|-------------------|-------------------|-------------------|---|
| -0.85606981325814 | 4.92557231838744  | 31.37353056422422 | h |
| 2.19113044205979  | 3.67998158651974  | 30.59848047578772 | h |
| 3.43176506910105  | 7.89339609797779  | 28.77415838287282 | h |
| 0.38866417238213  | 9.12840469957319  | 29.57699964031440 | h |
| 5.4355530492817   | 10.85641948952631 | 31.93023195784243 | h |
| 2.30067396605591  | 12.06110699097398 | 32.38227940914972 | h |
| 17.08241663587502 | 7.45309990204146  | 29.76756540361925 | h |
| 17.32322482502765 | 4.20447460122913  | 30.66351326404448 | h |
| 23.74069346390446 | 6.56558840442984  | 31.19162146219765 | h |
| 21.00402976094711 | 8.36156017476291  | 32.09223356475926 | h |
| 21.24843187947264 | 5.09184844057145  | 32.96444355254117 | h |
| 5.42802270234356  | 12.67404871578591 | 36.05114471645065 | h |
| 5.26136600168311  | 9.33294967356474  | 36.54956346159894 | h |
| 0.35751292168456  | 11.82750836303821 | 40.60208169230025 | h |
| 3.16309127893975  | 9.91490143241140  | 40.59998559505600 | h |
| 3.40110533405452  | 13.27470738005977 | 40.20260537845233 | h |

\$user-defined bonds  
\$end

[La-Motex.6Water]^{2+}:

\$symmetry c1

\$dft

functional b-p

gridsize 5

\$coord

|                    |                   |                   |    |
|--------------------|-------------------|-------------------|----|
| 2.47393672546720   | 0.60730507862878  | 6.73936159021950  | c  |
| -0.27601130156025  | 0.57501476477311  | 7.04573860900477  | c  |
| -0.86776052162276  | 0.78695801020233  | 9.54707670813283  | n  |
| 1.34084538215894   | 1.02317607517809  | 10.84761100080182 | c  |
| 3.48085995795877   | 0.88520018207271  | 9.14046022982314  | c  |
| -2.10180052147696  | 0.47623405541630  | 5.12761424148717  | c  |
| -4.74636617914885  | 0.83406264771291  | 5.23448730665460  | c  |
| -6.15620171778471  | 1.37689596886916  | 7.34975628801232  | n  |
| -8.56501873766712  | 1.89271474559685  | 6.50556810146104  | c  |
| -8.72237826396981  | 1.55144450357933  | 3.76492051688344  | c  |
| -6.33275431747074  | 0.88765614765138  | 2.97044121095189  | c  |
| -10.61083254212601 | 2.80441651881337  | 7.95258984148650  | c  |
| -10.77029397588550 | 3.45856059577940  | 10.52177039189104 | c  |
| -8.82608919282417  | 3.15574694799551  | 12.18505368273887 | n  |
| -9.56741121060944  | 4.11948845245670  | 14.45276086187931 | c  |
| -12.13065060691914 | 5.08104423517814  | 14.29067542649668 | c  |
| -12.91284735919456 | 4.64344868152549  | 11.81818280796140 | c  |
| -7.85539278969665  | 4.13633626406924  | 16.54049921411374 | c  |
| -5.57107137447375  | 3.14619719880393  | 16.21210718024879 | n  |
| -4.86751757894362  | 0.62681887739719  | 11.99107366209233 | la |
| -7.96493938268937  | -3.07581434468630 | 12.14703989122475 | o  |
| -15.42524937829746 | 5.31765358004697  | 10.67051871897626 | c  |
| -17.68166556319166 | 3.64180232765788  | 11.49091136336053 | c  |
| -17.35322457835523 | 0.82996914176442  | 10.96779054014480 | c  |
| -15.57395207701944 | -0.35440372689566 | 12.68923137147998 | o  |
| -13.58711994469928 | 6.31648203399454  | 16.37380875812383 | c  |
| -5.47950070311676  | 0.30046389914489  | 0.33211392071871  | c  |
| -5.27159559159995  | -2.55093022809906 | -0.22367103476449 | c  |
| -11.05463594640261 | 1.85631161387560  | 2.18413867614030  | c  |
| -12.77825310096482 | -0.49165430241915 | 2.18760907083145  | c  |
| 1.30486445036528   | 1.48880748995727  | 13.50118568891004 | c  |
| -0.88687405139446  | 1.71582488069629  | 14.67969200171735 | n  |
| -1.20195853696686  | 2.27227081303536  | 17.19500725436093 | c  |
| -3.69026097803609  | 3.08486546240524  | 18.01589106714929 | c  |
| -4.03793008573860  | 3.79463084302456  | 20.56867770095284 | c  |

|                    |                   |                   |   |
|--------------------|-------------------|-------------------|---|
| -2.08739283912996  | 3.60724898887365  | 22.30870559086062 | c |
| 0.35627484534071   | 2.64688370812041  | 21.51185386201887 | c |
| 0.75381037226677   | 2.07321561570321  | 18.99611348639299 | c |
| 2.04043380007368   | 2.37271834029476  | 23.40010412320894 | o |
| 4.43957461408917   | 1.14347407348359  | 22.96650592190833 | c |
| 4.25971618683480   | -1.69691193101441 | 23.32807648312395 | c |
| 2.68572533384654   | -2.73139135970953 | 21.40722041596414 | o |
| 2.06678689297253   | -5.32616943780387 | 21.77340587652419 | c |
| -0.23175600082720  | -5.96616348304110 | 20.17378952451791 | c |
| 0.21867858499892   | -5.87170948257948 | 17.49039652167335 | o |
| 1.17601396193320   | -8.21200226411046 | 16.49984841712683 | c |
| 1.76393997585175   | -7.99767100857385 | 13.70985118125419 | c |
| -0.51607718794225  | -7.87631721702356 | 12.23690553505065 | o |
| -0.04692572499735  | -8.27330415691879 | 9.59534995703764  | c |
| -2.20053842537588  | 4.14319638509913  | 24.78342293207386 | o |
| -4.51460666884183  | 4.91890046737329  | 26.02715014490360 | c |
| -4.45831007773409  | 7.70271861818263  | 26.68658155663841 | c |
| -5.00305616249043  | 9.18553462743077  | 24.49791620257619 | o |
| -4.91919917330205  | 11.86487074533854 | 24.97982008284866 | c |
| -6.87902642672375  | 13.17849305428639 | 23.36448964830604 | c |
| -9.30123267187137  | 12.41124853883243 | 24.24260282142437 | o |
| -11.34766905777719 | 13.38192960487681 | 22.78618035195369 | c |
| -13.78196264973407 | 12.25003838918269 | 23.76470559584382 | c |
| -13.90663217903650 | 9.62380384002210  | 23.11572765112318 | o |
| -16.04128329202684 | 8.40564323743214  | 24.23678470506515 | c |
| 6.20744103128893   | 1.06631176058620  | 9.86964353673074  | c |
| 3.89022940997169   | 0.42825200902461  | 4.28979542863199  | c |
| 5.06678262891946   | 2.90843702184965  | 3.28067915103368  | c |
| 3.21138058702035   | 5.03920947572600  | 2.69834555277014  | c |
| 2.24282440712398   | 6.26680366286475  | 4.94106167706366  | o |
| -3.60505416514603  | 5.38945473013238  | 11.19988874171809 | o |
| -12.62589586780710 | -4.07184946328782 | 10.86514303844882 | o |
| -2.46113875626088  | 7.49755469235128  | 6.76520799143954  | o |
| -9.31326902824579  | 6.98388933900635  | 21.96005488262105 | o |
| -1.36479513714849  | 0.20239992703905  | 3.22085756476063  | h |
| 3.11191068766122   | 1.77600459135720  | 14.47692117821551 | h |
| 2.54560057196314   | 1.26066653298110  | 18.41295531462425 | h |
| -5.88466485679729  | 4.47932067705119  | 21.16811295060160 | h |
| -8.44858006749935  | 5.02760151887233  | 18.32282038197975 | h |
| -12.32268992477813 | 3.15107480786061  | 6.85622656008377  | h |
| -10.50084757103071 | 2.28884641047992  | 0.22733925618479  | h |
| -12.14075969728570 | 3.51000412208730  | 2.83309985372682  | h |
| -14.46564142195050 | -0.15772667841223 | 1.02573960161005  | h |
| -11.78739138455381 | -2.14418085407828 | 1.41617936096446  | h |
| -13.39682124715474 | -0.97854830258727 | 4.10953686549963  | h |
| -3.63957996352118  | 1.20458635359961  | -0.03880391373475 | h |
| -6.80512900873837  | 1.15992479471279  | -1.01894840457877 | h |
| -4.65605741624462  | -2.86996558744244 | -2.18017579959303 | h |
| -3.90546433057488  | -3.47415088937516 | 1.03996944454647  | h |
| -7.10159224339495  | -3.49542828379923 | 0.03436370349519  | h |
| 6.78401051493223   | 3.03628199684195  | 10.21998942590738 | h |
| 6.61783841654361   | -0.00257809754182 | 11.60337428757100 | h |
| 7.43995403402730   | 0.32346111054699  | 8.37479607216100  | h |
| -4.55283246574164  | 3.81752198804596  | 27.78707270121606 | h |
| -6.19432939563168  | 4.44390986262657  | 24.90445640226784 | h |
| -2.58704814027936  | 8.19791152276661  | 27.46891409636754 | h |
| -5.89407014010743  | 8.05090037326765  | 28.16664626815397 | h |
| -15.28209889431040 | 5.26577135433276  | 8.59636679981873  | h |
| -15.88457482499823 | 7.29063747349997  | 11.15578200152332 | h |
| -19.37455679637304 | 4.29825475751016  | 10.47466153929765 | h |

|                    |                    |                   |   |
|--------------------|--------------------|-------------------|---|
| -18.07854756735500 | 3.90251687859603   | 13.51726037547662 | h |
| -19.14896753232474 | -0.17468166463857  | 11.23920009759412 | h |
| -14.29720178215495 | 0.92106840436301   | 13.09982557157697 | h |
| -12.33636363134607 | 7.25479373589817   | 17.73702118798834 | h |
| -14.91144307375950 | 7.73054471223888   | 15.62561812558506 | h |
| -14.71358678801935 | 4.93002534841725   | 17.44304854413600 | h |
| -5.33818608852852  | 12.23547642860273  | 26.98770183302469 | h |
| -3.01493687940673  | 12.59955117118476  | 24.55147526201386 | h |
| -6.63146512443853  | 15.24945609303872  | 23.53503998437647 | h |
| -6.62847133148644  | 12.66576754698093  | 21.35018799591264 | h |
| -11.45274884488169 | 15.46419754409552  | 22.95550364246423 | h |
| -11.09481143152900 | 12.91141856916426  | 20.76302597256551 | h |
| 2.95527217244719   | -6.32350745835436  | 13.33267967340420 | h |
| -1.88162904667799  | -8.20170842549543  | 8.63702578758870  | h |
| 1.20794526653084   | -6.80061817101325  | 8.81911025826925  | h |
| 0.81400446414461   | -10.14313170347939 | 9.28418017518309  | h |
| -15.40642550873814 | 13.26309193081776  | 22.92636259326020 | h |
| -13.87444930343060 | 12.47504631197006  | 25.83948578362133 | h |
| -15.98557558532418 | 6.41672237614973   | 23.65982690022838 | h |
| -15.96523202925671 | 8.52024688326906   | 26.31758442081333 | h |
| -17.82363113952229 | 9.26516296476346   | 23.57810778739494 | h |
| -8.04734769523762  | 8.04811874137185   | 22.81061465078785 | h |
| -10.92962292337432 | 7.76882180305429   | 22.45625740565587 | h |
| -9.77086704432166  | -3.53993423534017  | 11.67173968668696 | h |
| -7.24375746070304  | -4.45059815616419  | 13.13504939532145 | h |
| -13.36723324974626 | -5.73571759863700  | 11.08557383573483 | h |
| -13.86504554482850 | -2.82282003889900  | 11.56919689138751 | h |
| -16.73209154270774 | 0.51101446279831   | 9.00005657517514  | h |
| -3.19570187590118  | 6.07493245684228   | 9.47488788301903  | h |
| -4.61384719653920  | 6.68560118628856   | 12.01647154773756 | h |
| -0.82783353498586  | 7.03497023022058   | 5.96969151696639  | h |
| -3.69689149881086  | 7.54488783316876   | 5.41098196637036  | h |
| 3.54598138955638   | 7.37778708529911   | 5.60783134211113  | h |
| 4.10832617860631   | 6.45418021752276   | 1.46218677925178  | h |
| 1.53826339301420   | 4.31836017173595   | 1.69783909309867  | h |
| 6.08562685617665   | 2.45616946051054   | 1.52128540140191  | h |
| 6.50714688890118   | 3.61324749265122   | 4.60994191424524  | h |
| 5.43453436755123   | -0.95343241561964  | 4.50620338911239  | h |
| 2.64806011159073   | -0.35648414928579  | 2.81604114846201  | h |
| -3.10728733563522  | -3.78273944951902  | 13.93424887627940 | o |
| -2.37249548500537  | -5.21301421176103  | 12.94643248060037 | h |
| -2.13468981943545  | -3.99624912517331  | 15.51376577873072 | h |
| 5.20364223777965   | 1.63886237294944   | 21.09883625682963 | h |
| 5.70032386244529   | 1.93340858516931   | 24.41212970892440 | h |
| 6.19431435114335   | -2.49476613357951  | 23.24963757834298 | h |
| 3.46965067238582   | -2.11237774004359  | 25.21840434879740 | h |
| 1.57335223427927   | -5.68522365473758  | 23.77492628792964 | h |
| 3.69908057611330   | -6.54798686237297  | 21.30571720758564 | h |
| -0.94779792332006  | -7.85148806451567  | 20.70898453856712 | h |
| -1.72276599892743  | -4.57133727841923  | 20.55726062766819 | h |
| 2.94441434837999   | -8.73101337107983  | 17.47875464471254 | h |
| -0.21551139565894  | -9.73684016585423  | 16.81744559183195 | h |
| 2.83847416202589   | -9.69760272160956  | 13.15262335525468 | h |

\$user-defined bonds

\$end

[Gd-Motex.6Water]^{2+}:

\$symmetry c1

\$dft

functional b-p

gridsize 5  
Energy: -3390.668419356  
\$coord

|                    |                    |                   |    |
|--------------------|--------------------|-------------------|----|
| 2.24102620378748   | 1.41741976533332   | 6.16267109850253  | c  |
| -0.49200597457116  | 1.63426859251653   | 6.50852020013938  | c  |
| -1.02442464390832  | 1.86784897484252   | 9.01825230958304  | n  |
| 1.20754127282115   | 1.79633726073281   | 10.29847648976210 | c  |
| 3.30019388021228   | 1.48654309843335   | 8.55846100317915  | c  |
| -2.37231174226733  | 1.59427861055953   | 4.64216230590869  | c  |
| -5.02005735216768  | 1.85383856074490   | 4.85317613892331  | c  |
| -6.38207152945697  | 2.29956797977552   | 7.02755612569440  | n  |
| -8.87343057079353  | 2.51651605727544   | 6.28749264374136  | c  |
| -9.10749795374483  | 2.15044226899455   | 3.55980977515696  | c  |
| -6.69781371877801  | 1.74218801551783   | 2.66288016464313  | c  |
| -10.96570616992638 | 3.06215867597135   | 7.84375140582953  | c  |
| -11.08723959973685 | 3.60799968891773   | 10.43951202606553 | c  |
| -9.00184509609129  | 3.74005026604689   | 11.94713806066595 | n  |
| -9.77511907898927  | 4.37502195400796   | 14.32202865130134 | c  |
| -12.49757934865982 | 4.67763098675066   | 14.38155188231154 | c  |
| -13.34014312634195 | 4.14383371571323   | 11.94585849850374 | c  |
| -7.98455090975965  | 4.49897863915964   | 16.33515085409718 | c  |
| -5.60186554914437  | 3.86734342705127   | 15.83918546595820 | n  |
| -4.77113494620902  | 2.39567994843522   | 11.40580611070570 | gd |
| -5.47119106364365  | -1.77390760062690  | 12.66352176062084 | o  |
| -16.02800859918983 | 3.98492095034724   | 11.04779571366428 | c  |
| -17.43499195351583 | 1.54315756520704   | 11.86482877547401 | c  |
| -16.07371811357165 | -0.92383484985916  | 11.24950880848697 | c  |
| -14.01425382204821 | -1.44569672506539  | 12.98422209887786 | o  |
| -14.05169824587531 | 5.37900252893343   | 16.63649417799009 | c  |
| -5.89957477618737  | 1.22936162762968   | -0.00783272947548 | c  |
| -5.41113546814648  | -1.58762846640568  | -0.56539698613904 | c  |
| -11.52538470989389 | 2.19640712351225   | 2.08267612019217  | c  |
| -12.97050334756097 | -0.33184289480810  | 2.12644234151539  | c  |
| 1.21035301568107   | 2.07271801696606   | 12.97475295396646 | c  |
| -0.96067950670545  | 2.48270955835979   | 14.15864260004211 | n  |
| -1.25937125350763  | 2.79984138256488   | 16.71713555543695 | c  |
| -3.71067988156266  | 3.64128099259571   | 17.61366400215552 | c  |
| -4.04005422105949  | 4.11776432844891   | 20.22272044703309 | c  |
| -2.10679313969926  | 3.68365863065960   | 21.93362499214265 | c  |
| 0.29490929790577   | 2.68548826327227   | 21.05160229183361 | c  |
| 0.66667545512016   | 2.30694694151041   | 18.49454542406454 | c  |
| 1.97175294955213   | 2.22926388183371   | 22.90207063031708 | o  |
| 4.23938059865179   | 0.78027190843472   | 22.43983526081652 | c  |
| 3.87415994391078   | -1.94534115960220  | 23.23819774159894 | c  |
| 2.03350139441785   | -3.12535674012905  | 21.67362863502958 | o  |
| 1.43266566269550   | -5.60114715364924  | 22.56509236375424 | c  |
| -0.77583449009708  | -6.71088537874133  | 21.12634294542788 | c  |
| -0.05689394774441  | -7.39017917339098  | 18.59735520378801 | o  |
| -1.29522245441550  | -9.63438798407540  | 17.70512450961018 | c  |
| 0.01445337134739   | -10.65200568315085 | 15.37497725924397 | c  |
| -0.62771236238384  | -9.19529462044405  | 13.18251322690254 | o  |
| 0.60163240101615   | -10.11117238735736 | 10.95323811024366 | c  |
| -2.19621279196966  | 4.00927759838405   | 24.44446795588540 | o  |
| -4.48169051761426  | 4.74609356072615   | 25.76230716206621 | c  |
| -4.36401541813527  | 7.47512203453022   | 26.61231268500557 | c  |
| -4.92625098404003  | 9.10887625431329   | 24.54105328359523 | o  |
| -4.77446473487516  | 11.74125499239453  | 25.20469853720435 | c  |
| -6.45106713544040  | 13.24392887316565  | 23.44491771165938 | c  |
| -9.00199816412838  | 12.61606287780582  | 24.01609918760820 | o  |
| -10.79369545027786 | 13.71002345810112  | 22.33100682556062 | c  |

|                    |                    |                   |   |
|--------------------|--------------------|-------------------|---|
| -13.41073043937282 | 12.85270203056765  | 23.09171031146852 | c |
| -13.72867824429156 | 10.22166278051010  | 22.53656883510585 | o |
| -16.05922645642675 | 9.26195406030181   | 23.50854848221456 | c |
| 6.03268433569096   | 1.31209166780824   | 9.26241034958053  | c |
| 3.59458291305739   | 1.20769265969554   | 3.68234088463012  | c |
| 4.85318104545752   | 3.65971442330979   | 2.70009750830951  | c |
| 3.09998950329345   | 5.91838381003343   | 2.31509327029315  | c |
| 2.39994041739421   | 7.14584808669931   | 4.66031813981468  | o |
| -3.75186687754942  | 6.84835392143552   | 10.76314679728283 | o |
| -9.79085504439662  | -4.18080008699884  | 11.81224416530224 | o |
| -1.97186803394622  | 8.95504601480062   | 6.67793596923094  | o |
| -9.31632255341883  | 7.11740594003227   | 21.94510636284905 | o |
| -1.70252665393239  | 1.32219003688505   | 2.71141743378134  | h |
| 3.02169844202689   | 2.00927984447103   | 13.97821213909106 | h |
| 2.43748087057093   | 1.50619061439943   | 17.83286715255938 | h |
| -5.85224982506256  | 4.83748521591064   | 20.88363234807406 | h |
| -8.62480307633954  | 5.07114229944691   | 18.22658238146340 | h |
| -12.76955746735538 | 3.11125075072847   | 6.84766920308939  | h |
| -11.10647039780242 | 2.70166204530361   | 0.10972747948499  | h |
| -12.76112387680148 | 3.71316937420600   | 2.79502647671206  | h |
| -14.71520506577709 | -0.19316079240423  | 1.01085913099533  | h |
| -11.82005077073453 | -1.86321691410654  | 1.32766096778163  | h |
| -13.48142966860139 | -0.88393627325776  | 4.06269379848039  | h |
| -4.18537737492468  | 2.32475557352330   | -0.45796544109553 | h |
| -7.36599669466279  | 1.93417789777690   | -1.30176915733536 | h |
| -4.85339734844212  | -1.85242030104300  | -2.54704637216536 | h |
| -3.90072099336392  | -2.35262927406629  | 0.63784546491986  | h |
| -7.11502761311874  | -2.72158400879340  | -0.22218629472316 | h |
| 6.80311320297143   | 3.16196950685503   | 9.82763714258578  | h |
| 6.33302377221976   | 0.01315459096092   | 10.85702163169856 | h |
| 7.17938575396410   | 0.62541523616449   | 7.67635477237597  | h |
| -4.52595909976389  | 3.52298292733757   | 27.43924847503686 | h |
| -6.18063261913738  | 4.38395563312933   | 24.62507817210206 | h |
| -2.46972420189078  | 7.88874956935994   | 27.38809840127209 | h |
| -5.76255272353210  | 7.74679948503251   | 28.14369502280496 | h |
| -16.08096491138030 | 4.12169129877256   | 8.97359547381018  | h |
| -17.10312797986771 | 5.62149733779545   | 11.75499173826919 | h |
| -19.29015481280188 | 1.52308409980701   | 10.92354512956301 | h |
| -17.82009994027967 | 1.58770654528370   | 13.90990420328828 | h |
| -17.37399863519926 | -2.53144546760549  | 11.42843910275183 | h |
| -13.28180124991613 | 0.18811337788042   | 13.44501167552000 | h |
| -13.09350526714413 | 6.79657677851253   | 17.81200334686845 | h |
| -15.89078873052060 | 6.15214955625751   | 16.06537354728765 | h |
| -14.42332463256567 | 3.73153129807865   | 17.85427565278579 | h |
| -5.42896244323070  | 12.01536191946592  | 27.16635928602443 | h |
| -2.79832808726943  | 12.39699068072361  | 25.06506804057080 | h |
| -6.09544711524883  | 15.28634070546456  | 23.73113372653510 | h |
| -6.00535193967987  | 12.78566463854549  | 21.45124198175622 | h |
| -10.71892393498516 | 15.79858286585188  | 22.42563845288885 | h |
| -10.38646040891287 | 13.13832130207900  | 20.35926723582398 | h |
| 2.08273237498637   | -10.64425769396743 | 15.66655091601344 | h |
| -0.02455391939043  | -8.91751424986987  | 9.38072566803996  | h |
| 2.67508737115262   | -9.99516059260720  | 11.13556742982946 | h |
| 0.06002666908225   | -12.08729757307962 | 10.57458186183136 | h |
| -14.83651480037029 | 13.97128997274732  | 22.05035331999310 | h |
| -13.68714196406506 | 13.18424796016086  | 25.13547138794513 | h |
| -16.14493613096820 | 7.25097862229511   | 23.01862323786021 | h |
| -16.14988106878226 | 9.46779027832167   | 25.58140318395836 | h |
| -17.68800779000864 | 10.24995624257125  | 22.65923309641000 | h |
| -8.04312918708477  | 8.13447098727106   | 22.83953513913272 | h |



|                    |                    |                   |   |
|--------------------|--------------------|-------------------|---|
| -10.89249058888815 | 8.06317799390758   | 22.24907608486551 | h |
| -7.06436676560569  | -2.79846387582734  | 12.43819622853350 | h |
| -4.08229462534668  | -2.86898223398770  | 13.40845840502650 | h |
| -10.04515440160830 | -5.94032792495295  | 12.26204441391886 | h |
| -11.40700857757567 | -3.29623565124818  | 12.21771126034693 | h |
| -15.34655520788883 | -0.90458906614861  | 9.29225626029011  | h |
| -3.06390399470323  | 7.62518690504624   | 9.14548348975475  | h |
| -4.17239524003505  | 8.23526206817148   | 11.88501029178891 | h |
| -0.44128123178417  | 8.27193336114930   | 5.82515762688988  | h |
| -3.12357758436408  | 9.48040101881024   | 5.35092731915698  | h |
| 3.86380606918138   | 8.05746217806532   | 5.29689266202487  | h |
| 3.98596626705854   | 7.30925005124315   | 1.04410889866970  | h |
| 1.30405193027446   | 5.33841852696016   | 1.44585982271289  | h |
| 5.74482670295452   | 3.22631819676435   | 0.86870648979581  | h |
| 6.40618184397939   | 4.22543518031551   | 3.96841665197540  | h |
| 5.07717937250039   | -0.24669766441795  | 3.83470907866198  | h |
| 2.28301244047587   | 0.51432476964809   | 2.22322849102300  | h |
| -1.52387845272842  | -4.25026782692506  | 14.33096070529553 | o |
| -1.19705749213658  | -5.94246579613472  | 13.58700783391268 | h |
| -1.05910943102286  | -4.55022811611479  | 16.10095289445338 | h |
| 4.85234924005916   | 0.92466407539615   | 20.46352475534712 | h |
| 5.69338771729217   | 1.65210469025555   | 23.63681378029136 | h |
| 5.72398407683347   | -2.91920259164144  | 23.10158008890622 | h |
| 3.27054125246498   | -2.00735064351570  | 25.23996819587881 | h |
| 0.90446490868859   | -5.51086766742482  | 24.58882319172173 | h |
| 3.09119132348056   | -6.86182336254753  | 22.38842418402591 | h |
| -1.40089932923442  | -8.41358591899441  | 22.15726977590597 | h |
| -2.37245490926799  | -5.36504505822588  | 21.09111628450141 | h |
| -1.20127589170911  | -11.10596730821239 | 19.18266063278766 | h |
| -3.31145133268554  | -9.26457955199284  | 17.29458304527879 | h |
| -0.59602496433536  | -12.62805140889754 | 15.08021623487868 | h |

\$user-defined bonds  
\$end

[Lu-Motex.6Water]^{2+}:

\$symmetry c1  
\$dft  
functional b-p  
gridsize 5  
Energy:-3394.767536066

|                    |                  |                   |   |
|--------------------|------------------|-------------------|---|
| \$coord            |                  |                   |   |
| 2.13062866233219   | 0.89085850587641 | 6.44635281064524  | c |
| -0.58502519882570  | 1.29048861739593 | 6.73845035962987  | c |
| -1.16712374358722  | 1.59756411289895 | 9.23230322328454  | n |
| 1.03946378453103   | 1.38203199193302 | 10.54307050004736 | c |
| 3.14259415517170   | 0.91592225867111 | 8.85947430724937  | c |
| -2.40772176952479  | 1.32284108235168 | 4.82828022393417  | c |
| -5.02997642311740  | 1.72327304609623 | 5.00609155048451  | c |
| -6.38587990110634  | 2.29768899292336 | 7.15810470411842  | n |
| -8.85593900655263  | 2.57676925629672 | 6.36054312903007  | c |
| -9.07631742769244  | 2.13962323844050 | 3.64436479293494  | c |
| -6.67646342216910  | 1.61161831506311 | 2.79465389796392  | c |
| -10.95023298125331 | 3.23195905954374 | 7.85377013094616  | c |
| -11.06413529020788 | 3.79686553954047 | 10.43534925178540 | c |
| -8.99153035685640  | 3.80168758276694 | 11.97123919434750 | n |
| -9.78776231526571  | 4.52044071203103 | 14.31766288905937 | c |
| -12.48086392975298 | 4.99751066918385 | 14.32934403308787 | c |

|                    |                    |                   |    |
|--------------------|--------------------|-------------------|----|
| -13.30701612378501 | 4.49175994292422   | 11.88542401313004 | c  |
| -8.03840662631357  | 4.57990191801151   | 16.35094243615380 | c  |
| -5.68615849422198  | 3.83957579994205   | 15.87620109078699 | n  |
| -4.82373250682088  | 2.53307401872080   | 11.47038158025294 | lu |
| -5.75724591829659  | -1.47629924198911  | 12.44632368563166 | o  |
| -15.97831081087439 | 4.50167289135833   | 10.92792533258492 | c  |
| -17.56279567799519 | 2.16662392213810   | 11.73135001796108 | c  |
| -16.35428896918383 | -0.38982954093780  | 11.16597323846122 | c  |
| -14.34393088495125 | -1.01464821422632  | 12.92479308418308 | o  |
| -14.02156858250297 | 5.82878647640108   | 16.54831727492099 | c  |
| -5.86706978110884  | 0.98617508398617   | 0.15122673439103  | c  |
| -5.59250426983293  | -1.86962944674401  | -0.35132812059581 | c  |
| -11.47304437844894 | 2.22453907147037   | 2.13438049237214  | c  |
| -12.99246522859450 | -0.25914537988871  | 2.20775993165456  | c  |
| 1.00971919900899   | 1.68258339297538   | 13.20248360820419 | c  |
| -1.16338606779983  | 2.23577266056429   | 14.31784753911082 | n  |
| -1.43861176672071  | 2.63004451261636   | 16.86702309630950 | c  |
| -3.85827628495435  | 3.57568053780237   | 17.70618437024251 | c  |
| -4.21993175967356  | 4.11904014808170   | 20.29812329488191 | c  |
| -2.31273920205103  | 3.69567533879835   | 22.03936293622162 | c  |
| 0.08830154538410   | 2.64544848051993   | 21.20800167612366 | c  |
| 0.46811852011316   | 2.14894991313642   | 18.67212964024162 | c  |
| 1.74638080723979   | 2.25108930404605   | 23.09147040962273 | o  |
| 4.12585420382732   | 0.98419583326481   | 22.65657330149303 | c  |
| 3.92365947413460   | -1.81619587047670  | 23.23023589485627 | c  |
| 2.28026307655891   | -2.97124570409285  | 21.44604000056646 | o  |
| 1.65112575149650   | -5.51527189893545  | 22.08521011970220 | c  |
| -0.51045007752882  | -6.39455411855495  | 20.41527310491785 | c  |
| 0.19291148271617   | -6.76578773396666  | 17.81908160532836 | o  |
| 1.01807320549141   | -9.29648005735570  | 17.28478568290558 | c  |
| 1.74899563295193   | -9.59299779208617  | 14.53517003288691 | c  |
| -0.44151936162134  | -9.55187206966245  | 12.93992164118288 | o  |
| 0.10336007280407   | -10.45063888440969 | 10.44405119496403 | c  |
| -2.42278653116147  | 4.09191773525554   | 24.53956814766464 | o  |
| -4.72936202149436  | 4.83312775167182   | 25.81916618150902 | c  |
| -4.62915838539067  | 7.56626177187858   | 26.65907921707094 | c  |
| -5.14797230017082  | 9.19669572817249   | 24.57231269855433 | o  |
| -5.01577130425683  | 11.83297189277900  | 25.23279031352298 | c  |
| -6.76886800940142  | 13.31446607124738  | 23.52897883609852 | c  |
| -9.28945100006696  | 12.62304129474770  | 24.15704662085757 | o  |
| -11.15427101358118 | 13.73094752880239  | 22.56171943519823 | c  |
| -13.72460067467255 | 12.76994164136134  | 23.35786398556633 | c  |
| -13.98201299345882 | 10.15321105885023  | 22.70888378783593 | o  |
| -16.25346263611021 | 9.08648179027565   | 23.71037386376839 | c  |
| 5.84222552693065   | 0.57038031187450   | 9.62346277876368  | c  |
| 3.51431261332695   | 0.57083304256520   | 3.99544086366441  | c  |
| 4.94109804175665   | 2.93250415822382   | 3.02119256276122  | c  |
| 3.33796692602699   | 5.29365112517858   | 2.59702519674416  | c  |
| 2.67797187343502   | 6.57700282036712   | 4.92589107271091  | o  |
| -3.65044846235271  | 6.73138128441625   | 10.85750505291775 | o  |
| -10.15431382719072 | -3.75711295788307  | 11.67647473470538 | o  |
| -1.53278084367130  | 8.73827088203312   | 6.92520540539412  | o  |
| -9.49163997579683  | 7.21335451713062   | 21.89754732489101 | o  |
| -1.71890971218285  | 0.96970792142973   | 2.91802594641901  | h  |
| 2.78439626211447   | 1.52084306911350   | 14.25492615427968 | h  |
| 2.21464112751127   | 1.25589415329413   | 18.06922744354290 | h  |
| -6.02127597323289  | 4.89463423710872   | 20.92107269958402 | h  |
| -8.67339631295002  | 5.19307825317200   | 18.23026119812698 | h  |
| -12.73487397670746 | 3.35283071866245   | 6.83025630565970  | h  |
| -11.01095941455296 | 2.67570731885614   | 0.15793403485406  | h  |

|                    |                    |                   |   |
|--------------------|--------------------|-------------------|---|
| -12.67467604473235 | 3.79034258342692   | 2.79614435861479  | h |
| -14.72749355000662 | -0.08507117127859  | 1.08206681294867  | h |
| -11.88482530942502 | -1.83576053336819  | 1.43714682710581  | h |
| -13.52800491906176 | -0.76710053831599  | 4.14934789934823  | h |
| -4.06514921061325  | 1.93617038138545   | -0.28318284604128 | h |
| -7.24966726754468  | 1.77844577157942   | -1.18410488079891 | h |
| -5.00180364371267  | -2.21083447626015  | -2.31173128678300 | h |
| -4.18342684158710  | -2.73252376305614  | 0.90736681788604  | h |
| -7.39189368550032  | -2.85676140740620  | -0.04412522436289 | h |
| 6.74274121438156   | 2.37952844157345   | 10.12501147758209 | h |
| 6.01902407534575   | -0.67673780779668  | 11.27585587671461 | h |
| 6.95883979401154   | -0.26793397703571  | 8.08906246730823  | h |
| -4.79775484635751  | 3.62063349808292   | 27.50352885310981 | h |
| -6.40961928103864  | 4.46040713459111   | 24.65872533413506 | h |
| -2.75195007812395  | 7.98137298717238   | 27.47404197125705 | h |
| -6.06144188068698  | 7.84034008065965   | 28.15832458183861 | h |
| -15.97808268329252 | 4.62476160745429   | 8.85249314135256  | h |
| -16.95664757770499 | 6.21164853711686   | 11.59981279899695 | h |
| -19.39303262562052 | 2.26002600261714   | 10.74670237774802 | h |
| -17.99019875678448 | 2.25498176972934   | 13.76667323484590 | h |
| -17.75604189745799 | -1.90839250776580  | 11.35561312696210 | h |
| -13.54913831247289 | 0.58020621643065   | 13.41658731682439 | h |
| -12.97097990579327 | 7.14816712439777   | 17.75722868280239 | h |
| -15.76820841138557 | 6.76604868006194   | 15.93409353834124 | h |
| -14.57206219272758 | 4.21736063924271   | 17.74623572925770 | h |
| -5.61113117993994  | 12.09698505203672  | 27.21386704562389 | h |
| -3.05556876284612  | 12.51822235473080  | 25.03155309598310 | h |
| -6.45080501538607  | 15.36102621561362  | 23.82729203123370 | h |
| -6.36283151273862  | 12.88725073927713  | 21.52005489006984 | h |
| -11.13184317551183 | 15.81540031387232  | 22.73664908994532 | h |
| -10.78613310285004 | 13.24722507907351  | 20.55924938013203 | h |
| 3.09245936470158   | -8.09690443617207  | 13.96379130141800 | h |
| -1.67119114864149  | -10.38710164332819 | 9.37752892679273  | h |
| 1.52792010658428   | -9.25622908448882  | 9.49760782004582  | h |
| 0.79454988619304   | -12.41492778415522 | 10.50577177166275 | h |
| -15.20999501857224 | 13.88569501388970  | 22.40058444782720 | h |
| -13.95265345146170 | 13.01487471289242  | 25.41974775762126 | h |
| -16.29400102835590 | 7.09225600379364   | 23.15122644480511 | h |
| -16.28938839175318 | 9.21620453018916   | 25.79107963327952 | h |
| -17.93502507226821 | 10.05270382550317  | 22.94355774385773 | h |
| -8.23208569010456  | 8.22241648601624   | 22.82034017712271 | h |
| -11.08896647634536 | 8.09798130340220   | 22.26999339963091 | h |
| -7.43399146243922  | -2.36231665068099  | 12.20694743850287 | h |
| -4.43863747402371  | -2.78671825103201  | 12.93062351549099 | h |
| -10.36384793586002 | -5.47764542716705  | 12.27894932221605 | h |
| -11.76278974723561 | -2.86284577119353  | 12.09446616436312 | h |
| -15.61165543908300 | -0.44723946129834  | 9.21553078288055  | h |
| -2.83151923510904  | 7.47439689436541   | 9.27506498557188  | h |
| -3.90567816496712  | 8.11082245792037   | 12.03713191345267 | h |
| -0.07508079983502  | 7.91715941158781   | 6.06311698692481  | h |
| -2.56293392602553  | 9.50796266751795   | 5.61740714381133  | h |
| 4.18860086917761   | 7.39240065321909   | 5.58390902115285  | h |
| 4.33048691594636   | 6.62017137803101   | 1.33629458495649  | h |
| 1.52396482293199   | 4.82184291925367   | 1.70087400060596  | h |
| 5.83353085192660   | 2.43446287336550   | 1.20674766519814  | h |
| 6.50564177783296   | 3.40733057300997   | 4.31245214452528  | h |
| 4.90155797064148   | -0.97015120723992  | 4.18721334274882  | h |
| 2.19014178428219   | -0.05268284282485  | 2.51683409749259  | h |
| -2.14389415043646  | -4.62078802199623  | 13.61642863312878 | o |
| -1.88134169147214  | -6.32040680063167  | 12.89127570764561 | h |

|                   |                    |                   |   |
|-------------------|--------------------|-------------------|---|
| -1.50359729744475 | -4.89511309667107  | 15.34375468463413 | h |
| 4.82278901525865  | 1.33076713553975   | 20.73187767619239 | h |
| 5.44729164832495  | 1.86129977312619   | 23.99476381559911 | h |
| 5.84533800453372  | -2.64633320066074  | 23.15431939720490 | h |
| 3.19199509187942  | -2.07601359540012  | 25.17175585713461 | h |
| 1.02639956459545  | -5.62171349403471  | 24.07991272215872 | h |
| 3.32117405892968  | -6.75895970815009  | 21.88328648023221 | h |
| -1.31675609547283 | -8.15318791105251  | 21.19529569005663 | h |
| -1.99908463462065 | -4.94380403244501  | 20.42181315367273 | h |
| 2.69131118477950  | -9.76242457065939  | 18.44359055516944 | h |
| -0.50237800160544 | -10.64735940452181 | 17.75873348071565 | h |
| 2.71310456707076  | -11.43446184774443 | 14.33344483884719 | h |

\$user-defined bonds  
\$end

[La-Motex.6Water]^{2+}:

\$symmetry c1

\$dft

functional b3-lyp

gridsize 5

Energy: -3384.150089949

\$coord

|                    |                   |                   |    |
|--------------------|-------------------|-------------------|----|
| 2.34188338445058   | 0.60331936889364  | 6.77044804837033  | c  |
| -0.39713521521620  | 0.55531140918064  | 7.08809130962670  | c  |
| -0.96205037868230  | 0.79568438436132  | 9.58287751519384  | n  |
| 1.22894631749803   | 1.06382901722098  | 10.85893330672116 | c  |
| 3.35153959578694   | 0.91963707258944  | 9.14795212128251  | c  |
| -2.22648309966100  | 0.42551658912539  | 5.19671014507833  | c  |
| -4.86758137369272  | 0.75483039037403  | 5.31337753469985  | c  |
| -6.26850769395953  | 1.27572262950263  | 7.41579574135438  | n  |
| -8.66921590441035  | 1.77897084296782  | 6.59350550207129  | c  |
| -8.83363293017200  | 1.43616567322739  | 3.86427779414499  | c  |
| -6.45746488666161  | 0.79712008298022  | 3.06529991719056  | c  |
| -10.70110989560635 | 2.68925391190651  | 8.04463926542735  | c  |
| -10.85700542790508 | 3.35020981390134  | 10.59894524862552 | c  |
| -8.92844361914464  | 3.04301457936393  | 12.26205458024522 | n  |
| -9.64310140958645  | 4.03329635682643  | 14.50212850482191 | c  |
| -12.18636364745186 | 5.01555712972228  | 14.33456632161516 | c  |
| -12.97339117643807 | 4.56504719352017  | 11.88532139239781 | c  |
| -7.91942708535428  | 4.06975763266232  | 16.58204303155715 | c  |
| -5.65660786211741  | 3.08836079217258  | 16.26518067840967 | n  |
| -4.94426373738578  | 0.55368158321488  | 12.04382511406293 | la |
| -7.95786839139081  | -3.27020448324818 | 12.13137690900403 | o  |
| -15.48325751408432 | 5.24692825420805  | 10.74273668106468 | c  |
| -17.74315521412910 | 3.57715070978957  | 11.54257550310755 | c  |
| -17.49456834940735 | 0.78298712454792  | 10.91274585880162 | c  |
| -15.74986086406136 | -0.52789050336754 | 12.54700687629500 | o  |
| -13.62097030000582 | 6.28598375542271  | 16.41145809403982 | c  |
| -5.60872865167530  | 0.23102879430461  | 0.42266375602986  | c  |
| -5.39700905448682  | -2.60808255961720 | -0.16074652070581 | c  |
| -11.17320928186404 | 1.72315690669755  | 2.29347940474005  | c  |
| -12.87648245252174 | -0.63196900366077 | 2.29800968657358  | c  |
| 1.20738424860106   | 1.54557362648221  | 13.51213462823283 | c  |
| -0.95344443934704  | 1.74785410671040  | 14.70037440590492 | n  |
| -1.28134294291138  | 2.27992283268543  | 17.21541766381574 | c  |
| -3.76084257894243  | 3.02923788981895  | 18.04823707680224 | c  |
| -4.11460268664884  | 3.67264016216173  | 20.60980171142652 | c  |
| -2.17303264733422  | 3.48389682139427  | 22.33623642588778 | c  |
| 0.28101709240444   | 2.61747147024658  | 21.51527615390325 | c  |

|                    |                   |                   |   |
|--------------------|-------------------|-------------------|---|
| 0.67770734429408   | 2.09864895180070  | 19.00441211995156 | c |
| 1.98098909431236   | 2.36010089955914  | 23.37557081768629 | o |
| 4.40480414855060   | 1.22483561117629  | 22.95105733835238 | c |
| 4.33012374876956   | -1.61577278777037 | 23.30425353218756 | c |
| 2.78968408464792   | -2.70735090084164 | 21.40775836033511 | o |
| 2.30933029973690   | -5.32120928260965 | 21.72642277256002 | c |
| 0.04726026933774   | -6.06168757245880 | 20.12843836564237 | c |
| 0.47169070182719   | -5.89614180700584 | 17.46210745035404 | o |
| 1.53270740575775   | -8.13519155154144 | 16.39433878426932 | c |
| 2.12352274639791   | -7.78485491947439 | 13.62397786263355 | c |
| -0.13526919328523  | -7.66533700314987 | 12.15177556154977 | o |
| 0.32040242219498   | -7.93696112845833 | 9.50920038900093  | c |
| -2.30554946398822  | 3.95545528286071  | 24.81074499703479 | o |
| -4.61900071547262  | 4.51915613808676  | 26.12333015377604 | c |
| -4.62891095898077  | 7.21630381120225  | 27.05954242760335 | c |
| -5.15820168196724  | 8.89214708153700  | 25.03468628321666 | o |
| -5.02180930517966  | 11.49668436471288 | 25.73636415802026 | c |
| -6.57799773075717  | 13.04966670429093 | 23.91883942446268 | c |
| -9.15118612829991  | 12.43906049111592 | 24.30615898706250 | o |
| -10.85131637927783 | 13.66546781289743 | 22.64388942311519 | c |
| -13.50533338154037 | 12.80902235093401 | 23.24299915693266 | c |
| -13.82673248435143 | 10.23015334416965 | 22.54495857701856 | o |
| -16.20866281099251 | 9.24332843449637  | 23.29575313133608 | c |
| 6.07789135774580   | 1.12863725631893  | 9.86832415631319  | c |
| 3.74961258569714   | 0.38921232838962  | 4.31933289293891  | c |
| 4.98453079657777   | 2.82700560012445  | 3.29607581718483  | c |
| 3.19851722320111   | 4.99422324909505  | 2.66011767197834  | c |
| 2.22789915780312   | 6.27189439334491  | 4.85367088077110  | o |
| -3.77994982018515  | 5.41478469199597  | 11.18321924845480 | o |
| -12.64688306689549 | -4.18508050388804 | 10.66282582031305 | o |
| -2.68888638663383  | 7.11385425688859  | 6.44398930697606  | o |
| -9.38192520281671  | 7.04868363528927  | 21.95400999806607 | o |
| -1.50410755666893  | 0.15651987514537  | 3.30331601705600  | h |
| 3.00754340290915   | 1.83912784732360  | 14.46208371135769 | h |
| 2.47293715470619   | 1.34889173114825  | 18.40778870951592 | h |
| -5.95661343510839  | 4.30247416482978  | 21.21825650456298 | h |
| -8.50158043992501  | 4.97638074687114  | 18.33760299477162 | h |
| -12.40121144288275 | 3.03253668818156  | 6.96271707533604  | h |
| -10.63571439883185 | 2.15856697797299  | 0.35008397912553  | h |
| -12.26279796109737 | 3.35449050736515  | 2.94243221497391  | h |
| -14.56039298592686 | -0.30606334878078 | 1.15346502853098  | h |
| -11.88543193981697 | -2.26351576560609 | 1.51931663315587  | h |
| -13.47893644850574 | -1.12655601572551 | 4.20824301977182  | h |
| -3.78666808279832  | 1.13726258853969  | 0.05957825824021  | h |
| -6.92743601691102  | 1.09135554446569  | -0.90952100425987 | h |
| -4.78238387271232  | -2.90172733278963 | -2.10691544498237 | h |
| -4.03971478549967  | -3.53799403952514 | 1.08467456028955  | h |
| -7.21389999309535  | -3.55186367661076 | 0.08125670589851  | h |
| 6.64323020310018   | 3.09504822026231  | 10.16773651705072 | h |
| 6.48793705946489   | 0.10877570091514  | 11.61438744481767 | h |
| 7.30258846973058   | 0.35701774205217  | 8.40253640246778  | h |
| -4.63754599788863  | 3.25112756351973  | 27.74921709577500 | h |
| -6.27570326156354  | 4.12906637497754  | 24.96707434026936 | h |
| -2.79196548124011  | 7.65626079227867  | 27.91130093408918 | h |
| -6.08160888126916  | 7.39385866850213  | 28.53057011255930 | h |
| -15.34261833639803 | 5.21582953899120  | 8.68386319653892  | h |
| -15.93683478938359 | 7.20066326185312  | 11.24261422689418 | h |
| -19.42735230512446 | 4.29465113291103  | 10.58496072820442 | h |
| -18.10033687442020 | 3.77277364327352  | 13.56884978299455 | h |
| -19.30961296401871 | -0.16258461989907 | 11.15159569905432 | h |

|                    |                   |                   |   |
|--------------------|-------------------|-------------------|---|
| -14.52407516556138 | 0.67605267998544  | 13.16388296044668 | h |
| -12.37878516981412 | 7.37403716900838  | 17.64182785504901 | h |
| -15.04839213796853 | 7.56558465487892  | 15.65457118461228 | h |
| -14.59916880048450 | 4.91131204688010  | 17.60671965440756 | h |
| -5.76957427776207  | 11.75067801048134 | 27.64973207682025 | h |
| -3.04985396017702  | 12.12963351130292 | 25.71024306835075 | h |
| -6.23156324111871  | 15.06436889048729 | 24.28039124254613 | h |
| -6.01435412422005  | 12.64414398160233 | 21.96175912971215 | h |
| -10.74635292212358 | 15.72492062706444 | 22.88156164232020 | h |
| -10.38436482983583 | 13.22343161030560 | 20.66999786869673 | h |
| 3.25364212916216   | -6.07143563135851 | 13.33305293042087 | h |
| -1.50712436062958  | -7.88149982833986 | 8.56657682918269  | h |
| 1.51440468839675   | -6.40493179629897 | 8.79396320863904  | h |
| 1.22901156922854   | -9.75027749396243 | 9.11200584826584  | h |
| -14.85725578777624 | 13.99113018810202 | 22.20514585496460 | h |
| -13.86458584476476 | 13.04062631289610 | 25.27083853181662 | h |
| -16.27420136956036 | 7.27439878027640  | 22.70178010290486 | h |
| -16.44151240675077 | 9.33874111531170  | 25.35012009165905 | h |
| -17.75969696490125 | 10.27943300379856 | 22.39697767589758 | h |
| -8.14183825161321  | 7.94423550210486  | 22.97126735908425 | h |
| -10.93929523420723 | 7.98399952288080  | 22.24843080554608 | h |
| -9.71213101108587  | -3.68387395349566 | 11.57834105239164 | h |
| -7.31627315122936  | -4.66737691034229 | 13.11025657009939 | h |
| -13.40777564085761 | -5.83106645204741 | 10.51914802023505 | h |
| -13.93673985792154 | -3.02896011975449 | 11.34563752756498 | h |
| -16.90265633207265 | 0.52897830823535  | 8.94396534897116  | h |
| -3.39611505554125  | 6.03416193082478  | 9.46597116377771  | h |
| -4.82895328147399  | 6.68151703024499  | 11.95950020107481 | h |
| -0.96403874393435  | 6.89199092304918  | 5.81453551858683  | h |
| -3.31608496381394  | 8.66141959831898  | 5.72350025041761  | h |
| 3.56639894471288   | 7.23411385446523  | 5.62788534512007  | h |
| 4.15542750669582   | 6.35867637061228  | 1.43819896215656  | h |
| 1.53779896719260   | 4.31631659120326  | 1.64249942537856  | h |
| 6.00128055682557   | 2.32955018593675  | 1.56560137319586  | h |
| 6.41935447377305   | 3.50967237110198  | 4.62000899953336  | h |
| 5.25124300847712   | -1.01564899081341 | 4.53980507148575  | h |
| 2.49920186109222   | -0.36836637910286 | 2.86132418074458  | h |
| -3.04151337056708  | -3.79249048173882 | 13.99635306270154 | o |
| -2.25525887563901  | -5.14920441053188 | 12.99461372173789 | h |
| -2.07135005806471  | -3.95419136519581 | 15.55567151571236 | h |
| 5.15595259118818   | 1.74333561848590  | 21.10226392405433 | h |
| 5.62896337772329   | 2.04449101381160  | 24.39000342003640 | h |
| 6.27484094452391   | -2.33999872417270 | 23.20726117371066 | h |
| 3.57593338381864   | -2.05654093897801 | 25.18495037509188 | h |
| 1.84759970220578   | -5.73668676478978 | 23.70713113018423 | h |
| 3.98919625103161   | -6.43576040590543 | 21.23422599876105 | h |
| -0.54876249182255  | -7.97982811144876 | 20.63063253103135 | h |
| -1.50853016725662  | -4.77505022571422 | 20.54903178063461 | h |
| 3.30363912717558   | -8.61201566613247 | 17.35539334069681 | h |
| 0.21909561936732   | -9.71947972942077 | 16.63619108314017 | h |
| 3.24703550101927   | -9.41133549267169 | 13.00682478645213 | h |

\$user-defined bonds

\$end

[Gd-Motex.6Water]^{2+}:

\$symmetry c1

\$dft

functional b3-lyp

gridsize 5

Energy:-3388.483039584

\$coord

|                    |                    |                   |    |
|--------------------|--------------------|-------------------|----|
| 2.05630021038554   | 0.70557687523614   | 6.32436233941231  | c  |
| -0.64729621302765  | 1.13052640678037   | 6.62789103386785  | c  |
| -1.17713512641263  | 1.44420418781058   | 9.11831165289612  | n  |
| 1.00805370589820   | 1.24038957081308   | 10.41889142212709 | c  |
| 3.08281267609820   | 0.74893120725903   | 8.71604801293679  | c  |
| -2.48948273634275  | 1.22296585498734   | 4.74687540045384  | c  |
| -5.10089263064865  | 1.71084610958352   | 4.90964444212014  | c  |
| -6.45093445488999  | 2.27821577286078   | 7.04122635668764  | n  |
| -8.88731841892487  | 2.70921751750258   | 6.26975158931973  | c  |
| -9.10378749617156  | 2.35791330399039   | 3.54916115609886  | c  |
| -6.73958152542220  | 1.73923905013627   | 2.70022945345066  | c  |
| -10.94177666109890 | 3.43767676492387   | 7.78565574836170  | c  |
| -11.06888594968110 | 3.97510792634268   | 10.36918274190342 | c  |
| -9.02956368392698  | 3.89140687762369   | 11.92201073521049 | n  |
| -9.77916190931236  | 4.58595532117068   | 14.26445545099600 | c  |
| -12.44839645697805 | 5.15323364475548   | 14.26645013507379 | c  |
| -13.27902797729400 | 4.72590282887967   | 11.82518674811248 | c  |
| -8.01635964419036  | 4.57940307268502   | 16.30479594387689 | c  |
| -5.69164133975143  | 3.79868605535186   | 15.86035345668113 | n  |
| -4.91365977229078  | 2.22234651483916   | 11.44589086833991 | gd |
| -6.00135408794489  | -1.94887180416615  | 12.52196060923599 | o  |
| -15.94579650510645 | 4.86306753879422   | 10.86979688317168 | c  |
| -17.64642802470437 | 2.61165197070890   | 11.64860306899663 | c  |
| -16.64030864593314 | -0.00278998683360  | 10.97998826643347 | c  |
| -14.67071750740186 | -0.84417990031029  | 12.66434969698616 | o  |
| -13.97576366029157 | 5.99758176227057   | 16.48988162210465 | c  |
| -5.94697316000800  | 1.15604634780982   | 0.04374286483406  | c  |
| -5.72620043409950  | -1.68599683924841  | -0.52266459711194 | c  |
| -11.47975552720670 | 2.61315042257608   | 2.02776350656770  | c  |
| -13.14009300813060 | 0.22778334259285   | 2.03406300961257  | c  |
| 1.01229533084186   | 1.58195338236418   | 13.08744393959811 | c  |
| -1.11210777805508  | 2.14000896769611   | 14.24888519282008 | n  |
| -1.39853203366533  | 2.61531527956004   | 16.78093637879519 | c  |
| -3.80732263098113  | 3.55553350396225   | 17.63324648509966 | c  |
| -4.11582358514617  | 4.15528844211023   | 20.21206264335210 | c  |
| -2.19078323066861  | 3.79649124791260   | 21.92420227485515 | c  |
| 0.19639505359494   | 2.76720717934528   | 21.08125614963892 | c  |
| 0.53298106426968   | 2.21604105836120   | 18.56795075581556 | c  |
| 1.89247544585153   | 2.44485266589115   | 22.92600966939319 | o  |
| 4.24283118494207   | 1.15055387467533   | 22.53751316653110 | c  |
| 4.01952413616362   | -1.61488769917584  | 23.23064780992359 | c  |
| 2.35750005363215   | -2.82423054641865  | 21.52364752999774 | o  |
| 1.65786984958889   | -5.30142552952381  | 22.26812217981676 | c  |
| -0.43633288927646  | -6.24322526175125  | 20.55783091991021 | c  |
| 0.36961923388346   | -6.75334856185406  | 18.03404367781122 | o  |
| 1.25447588699383   | -9.27484226501583  | 17.65848569065189 | c  |
| 2.21091521943482   | -9.65334709375581  | 14.99561078274072 | c  |
| 0.18059034279668   | -9.67633210053142  | 13.23181891492446 | o  |
| 0.89456740202743   | -10.65396725783661 | 10.82945946448617 | c  |
| -2.27465176982347  | 4.25992434961932   | 24.40028778885597 | o  |
| -4.55879709060443  | 4.87127517639042   | 25.74633533308961 | c  |
| -4.56288039513260  | 7.59062015221127   | 26.61635555517176 | c  |
| -5.22083245262046  | 9.21476637771638   | 24.58528658492423 | o  |
| -5.17747611497154  | 11.83530239404812  | 25.24441927373327 | c  |
| -7.04707973918310  | 13.25390180758332  | 23.62182253782343 | c  |
| -9.50190891580169  | 12.45079817641063  | 24.30891980357399 | o  |
| -11.47859785717810 | 13.53266835642877  | 22.86517778855384 | c  |
| -13.96368060500664 | 12.43084787544536  | 23.73025638104345 | c  |
| -14.14546892755592 | 9.85243929129342   | 22.98039889175203 | o  |

|                    |                    |                   |   |
|--------------------|--------------------|-------------------|---|
| -16.32395802964950 | 8.63313754366547   | 23.97182638673728 | c |
| 5.78954132990539   | 0.40519962963729   | 9.45373997931033  | c |
| 3.42196811462938   | 0.33742942808519   | 3.87029693275974  | c |
| 4.97149147604835   | 2.61511220456938   | 2.90609419615001  | c |
| 3.50103722171713   | 5.04131511505703   | 2.40877992036927  | c |
| 2.82899624505124   | 6.37738645033864   | 4.68163632149253  | o |
| -3.57584478082562  | 6.63111532136248   | 10.81691762540264 | o |
| -10.58689841090430 | -4.02672820058959  | 11.84397408219650 | o |
| -1.48449497863810  | 8.50145693613482   | 6.68405142449798  | o |
| -9.54770930326374  | 7.10862544688300   | 21.86891555762941 | o |
| -1.82074301704548  | 0.88335787876692   | 2.84568200274785  | h |
| 2.80168236110135   | 1.43947602370553   | 14.08580751312882 | h |
| 2.27213150799266   | 1.35057594308166   | 17.96017244300508 | h |
| -5.89806301092039  | 4.91767621236047   | 20.84550545862058 | h |
| -8.65033829611252  | 5.19837367455727   | 18.16222489411546 | h |
| -12.69881162278231 | 3.65220281845274   | 6.76474406535935  | h |
| -10.98549074849825 | 3.07767554559389   | 0.07939632563241  | h |
| -12.58463982281205 | 4.21876333902128   | 2.71386840976321  | h |
| -14.83328810083316 | 0.52596577351108   | 0.89639395966884  | h |
| -12.12456296650487 | -1.38566059076267  | 1.25061976602043  | h |
| -13.73063423625048 | -0.28192038151415  | 3.94399776898024  | h |
| -4.14047039845263  | 2.07330939112599   | -0.36839357155459 | h |
| -7.30323994301305  | 1.99693750185216   | -1.26305550285138 | h |
| -5.16915213472927  | -1.98790887938022  | -2.48460695508341 | h |
| -4.32509351301212  | -2.59534262538034  | 0.68816728907223  | h |
| -7.52496124582830  | -2.64523706582343  | -0.21762868250795 | h |
| 6.71859804289435   | 2.21637548181555   | 9.81674857326362  | h |
| 5.97419208762682   | -0.73008433423068  | 11.16656127644032 | h |
| 6.85530474212706   | -0.54226201360868  | 7.96721141718503  | h |
| -4.53254072802506  | 3.64857152311989   | 27.40579212871508 | h |
| -6.23878774329612  | 4.43985042294449   | 24.63741425319509 | h |
| -2.69528109328245  | 8.07784292873888   | 27.36962939234132 | h |
| -5.94619071423151  | 7.78121615971777   | 28.15073263566819 | h |
| -15.94278421798878 | 5.00521349774099   | 8.81110119800921  | h |
| -16.83422810853116 | 6.59886570425455   | 11.55440628274400 | h |
| -19.47598960381431 | 2.85372546162315   | 10.72081279239372 | h |
| -18.01667687736971 | 2.66973785155375   | 13.68091509890462 | h |
| -18.14532175565816 | -1.40133007624661  | 11.13455864054004 | h |
| -13.79453392406442 | 0.62713418528082   | 13.29395668522405 | h |
| -12.86647603062663 | 7.16396347377250   | 17.77458511025073 | h |
| -15.61521572846728 | 7.09182087801332   | 15.88745470041260 | h |
| -14.67904265452781 | 4.38986138742265   | 17.58380965443858 | h |
| -5.70403407218722  | 12.06965952182699  | 27.23166202176981 | h |
| -3.27038869832078  | 12.59573774578142  | 24.97449426003630 | h |
| -6.81388245278582  | 15.29221109805136  | 23.94123473676392 | h |
| -6.68944309792289  | 12.87643254053399  | 21.61086580433407 | h |
| -11.53156788776341 | 15.59040264349348  | 23.13016075071495 | h |
| -11.19437760481793 | 13.15331896075418  | 20.84399623265164 | h |
| 3.57859162849400   | -8.17311805754684  | 14.50317086854341 | h |
| -0.78126310627237  | -10.61961812566141 | 9.63672595169977  | h |
| 2.38158058942277   | -9.50564807474759  | 9.95734783349392  | h |
| 1.56252986289633   | -12.60407999215950 | 10.99983637661293 | h |
| -15.52223695278442 | 13.51550374963724  | 22.89566683560649 | h |
| -14.10332935831504 | 12.57714499423297  | 25.79273588136046 | h |
| -16.29482683868104 | 6.68665683475306   | 23.30575604421291 | h |
| -16.30481098132937 | 8.64164028995202   | 26.04132203848410 | h |
| -18.05777248532793 | 9.55357322626685   | 23.31367460299778 | h |
| -8.31770537524999  | 8.11048742199474   | 22.79546833864686 | h |
| -11.15673613455623 | 7.88611919909954   | 22.31268580458368 | h |
| -7.66636671268852  | -2.79318385006734  | 12.34645512371875 | h |



|                    |                    |                   |   |
|--------------------|--------------------|-------------------|---|
| -4.70686154413627  | -3.21877836430133  | 13.03640313336496 | h |
| -10.97924577565754 | -5.74399710345406  | 12.29722496587171 | h |
| -12.14700474301419 | -3.04643913657083  | 12.05983764636231 | h |
| -15.93772365596891 | -0.04544880862024  | 9.03191751075855  | h |
| -2.80701091980908  | 7.32328922870560   | 9.24414642515410  | h |
| -3.86000390856273  | 8.02777505069416   | 11.94527566451916 | h |
| -0.01226823292136  | 7.74867718743679   | 5.84882596443322  | h |
| -2.36364743167687  | 9.49984258761169   | 5.44480587772016  | h |
| 4.33144078595343   | 7.11041748680976   | 5.40549724417465  | h |
| 4.59613840290413   | 6.29073849083209   | 1.18014979807644  | h |
| 1.71454831858202   | 4.65005443279684   | 1.45529387829184  | h |
| 5.86962365815937   | 2.05259252138322   | 1.13075695056953  | h |
| 6.51721490951426   | 3.02929733332174   | 4.21646736344365  | h |
| 4.71658446225968   | -1.26371066790876  | 4.05639018781028  | h |
| 2.07959824263024   | -0.20737428562847  | 2.39887765070602  | h |
| -2.20980471107891  | -4.91683361703048  | 13.77595219711777 | o |
| -1.75163870676200  | -6.52838286438993  | 13.01658205138897 | h |
| -1.49997827546821  | -5.11024145041761  | 15.46518541395642 | h |
| 4.93264645838382   | 1.39984484493550   | 20.61210243265550 | h |
| 5.57222055625599   | 2.06429494761147   | 23.81815499783117 | h |
| 5.91323888447877   | -2.46750656982016  | 23.17106486464204 | h |
| 3.30861183537899   | -1.77835074638197  | 25.17229888510998 | h |
| 0.95035634722296   | -5.28456484196472  | 24.22023358185352 | h |
| 3.29925506513919   | -6.57051630245542  | 22.21005939620516 | h |
| -1.28928671394090  | -7.93820363127246  | 21.38619454350000 | h |
| -1.89579918781433  | -4.79100085291308  | 20.42803360597738 | h |
| 2.81909401440632   | -9.67585441827702  | 18.95494502164888 | h |
| -0.27435846897081  | -10.61749681521188 | 18.04972902033921 | h |
| 3.19326426225211   | -11.47751544973839 | 14.93677667199842 | h |

\$user-defined bonds  
\$end

[Lu-Motex.6Water]^{2+}:  
\$symmetry c1  
\$dft  
functional b3-lyp  
gridsize 5  
Energy: -3392.592339387  
\$coord

|                    |                   |                   |    |
|--------------------|-------------------|-------------------|----|
| 2.00987797427676   | 0.89377207063068  | 6.50417287816962  | c  |
| -0.69623562139793  | 1.29504236032628  | 6.79708421359871  | c  |
| -1.26015180502910  | 1.59791423154584  | 9.28392651067584  | n  |
| 0.92692402220145   | 1.37907322133584  | 10.58373784961920 | c  |
| 3.01761763125069   | 0.91612834139776  | 8.90114187828438  | c  |
| -2.51732741788775  | 1.32696099411121  | 4.90492596629841  | c  |
| -5.13325673861875  | 1.71913637957655  | 5.08693510307992  | c  |
| -6.48095007937220  | 2.29063680966636  | 7.22401462055418  | n  |
| -8.94197895423071  | 2.55909796184092  | 6.44781890765574  | c  |
| -9.16826159783467  | 2.10819174090566  | 3.74516605640229  | c  |
| -6.78379319586756  | 1.59287515918723  | 2.89256855299680  | c  |
| -11.02226280460698 | 3.21924806265119  | 7.94380133064489  | c  |
| -11.13355662964178 | 3.78216541244353  | 10.51201015266933 | c  |
| -9.07644209724791  | 3.75770499835038  | 12.04702842396308 | n  |
| -9.85355644621549  | 4.46686698728157  | 14.37881445388470 | c  |
| -12.53027034908773 | 4.97660608874119  | 14.39091343365959 | c  |
| -13.35736007516964 | 4.49973813175522  | 11.96212341657617 | c  |
| -8.10528868928475  | 4.50462303632991  | 16.41067214521664 | c  |
| -5.77118581655145  | 3.77544559031738  | 15.94506786189450 | n  |
| -4.91079766011881  | 2.51584719703829  | 11.52447187628594 | lu |
| -5.81547129624305  | -1.54216514576036 | 12.46732996770377 | o  |

|                    |                    |                   |   |
|--------------------|--------------------|-------------------|---|
| -16.02577530587077 | 4.56711049241741   | 11.00289184028256 | c |
| -17.67328749479859 | 2.28044556550304   | 11.79094389395789 | c |
| -16.60606989141423 | -0.31210207622315  | 11.13458479722766 | c |
| -14.59252248216884 | -1.09126689911260  | 12.79850610884699 | o |
| -14.04866848911441 | 5.82622656979882   | 16.61802998980793 | c |
| -5.98647706234149  | 0.96043677658537   | 0.24829458372208  | c |
| -5.72757301582261  | -1.89038496767106  | -0.25581560138327 | c |
| -11.57166190815633 | 2.16404677170326   | 2.24598819097205  | c |
| -13.06673138349985 | -0.32688987585619  | 2.33569560308096  | c |
| 0.90565355206778   | 1.66266495383528   | 13.24409245788855 | c |
| -1.24075729158489  | 2.20295165757378   | 14.36755255891378 | n |
| -1.52784516587616  | 2.58098269535178   | 16.91112347673940 | c |
| -3.93368791290459  | 3.50156924956141   | 17.75381245365130 | c |
| -4.28976745805810  | 4.01941320903705   | 20.34489309019847 | c |
| -2.39550804405977  | 3.58788734239963   | 22.07270324114468 | c |
| 0.00053121749041   | 2.56584773363710   | 21.23283817590322 | c |
| 0.37799156697055   | 2.10027684360074   | 18.70789383170507 | c |
| 1.65973953522897   | 2.16334387825740   | 23.09518918990304 | o |
| 4.04875487639305   | 0.94790714392422   | 22.68487364080864 | c |
| 3.89719768657344   | -1.85249291434697  | 23.24391357640040 | c |
| 2.30474409887835   | -3.03440355219248  | 21.45265649596448 | o |
| 1.74281282547515   | -5.59099756406274  | 22.03243747654898 | c |
| -0.32801723138156  | -6.52376188236950  | 20.28814678203231 | c |
| 0.45989573029146   | -6.82862474282805  | 17.72541665463673 | o |
| 1.42778332231944   | -9.28327730624791  | 17.16048218463445 | c |
| 2.25604683123442   | -9.47201387479333  | 14.43451365634872 | c |
| 0.13514981138379   | -9.48603307387590  | 12.77932757511507 | o |
| 0.75007481697509   | -10.32125514796636 | 10.29688991186688 | c |
| -2.51556221491586  | 3.96545303704288   | 24.56204303790911 | o |
| -4.80288754631017  | 4.62306040949383   | 25.88006320891336 | c |
| -4.73478397723391  | 7.32702967163514   | 26.79580184314383 | c |
| -5.25688684300133  | 9.00506559154902   | 24.76967954629614 | o |
| -5.05745965568748  | 11.60926004075925  | 25.45689415131254 | c |
| -6.58747820735401  | 13.18700862164231  | 23.63814496730655 | c |
| -9.17342250112060  | 12.64607249852689  | 24.04319374143093 | o |
| -10.84650616151986 | 13.89617183720483  | 22.36976073058638 | c |
| -13.52422982759555 | 13.13910344470922  | 22.99632859728003 | c |
| -13.94014579471167 | 10.56332910149577  | 22.33791928373848 | o |
| -16.35795051787066 | 9.67797905082936   | 23.10326537660566 | c |
| 5.71657474816549   | 0.57552652613614   | 9.66664700862612  | c |
| 3.39509426012960   | 0.56258825680712   | 4.05656561969131  | c |
| 4.91714348266151   | 2.87058508962931   | 3.12029272654879  | c |
| 3.41497023044265   | 5.27912447908690   | 2.63126054927963  | c |
| 2.71912149799906   | 6.59598577220557   | 4.91057472410616  | o |
| -3.76542895525038  | 6.74948641650621   | 10.95347671372050 | o |
| -10.27549017446040 | -3.82379239529975  | 11.67350897574096 | o |
| -1.60233359980287  | 8.66200461829587   | 6.93102477712470  | o |
| -9.61482960208138  | 7.22199812626563   | 21.86980132751165 | o |
| -1.83786961724853  | 0.98258490095919   | 3.00928169640935  | h |
| 2.67148547408347   | 1.48543457618388   | 14.27541898078582 | h |
| 2.11754156106009   | 1.23563674630842   | 18.10141582508734 | h |
| -6.07398217975591  | 4.78136595352223   | 20.96973821491214 | h |
| -8.74266277771003  | 5.09972087308161   | 18.27326037487132 | h |
| -12.79387195299120 | 3.33869570420172   | 6.93398784015593  | h |
| -11.12865802062267 | 2.60673732291375   | 0.28037613635880  | h |
| -12.77675772459791 | 3.70850230827693   | 2.90156399976235  | h |
| -14.79885814658212 | -0.16816554573135  | 1.22881886930974  | h |
| -11.96054982477231 | -1.88562510839410  | 1.56451779419171  | h |
| -13.58238678273340 | -0.83121989834741  | 4.26854299667912  | h |
| -4.19562021482563  | 1.89430006765051   | -0.19047808290058 | h |

|                    |                    |                   |   |
|--------------------|--------------------|-------------------|---|
| -7.35889450325616  | 1.75147527452945   | -1.07307561416573 | h |
| -5.15146223777970  | -2.22712854193664  | -2.20664655902165 | h |
| -4.32481625624758  | -2.75573612468816  | 0.98516513166668  | h |
| -7.51727200191257  | -2.86433845525430  | 0.05527750793693  | h |
| 6.61560854200805   | 2.37994155069626   | 10.12665914511337 | h |
| 5.88890487535170   | -0.63264962219114  | 11.33038161671730 | h |
| 6.81929418868540   | -0.29029722195350  | 8.15775279818280  | h |
| -4.84458804498832  | 3.37177681831491   | 27.51769388978314 | h |
| -6.47530640517082  | 4.26242709947661   | 24.73532499567358 | h |
| -2.87567947502795  | 7.72941747448719   | 27.61774276277449 | h |
| -6.16059766522294  | 7.54807563269258   | 28.28688029257264 | h |
| -16.02285461035164 | 4.69849743085245   | 8.94378835093387  | h |
| -16.95639671440253 | 6.28495009077802   | 11.67435061340252 | h |
| -19.50684901108591 | 2.47245730827444   | 10.85956112118981 | h |
| -18.04924316286990 | 2.34013024998924   | 13.82288866230583 | h |
| -18.07595108926283 | -1.74519651918412  | 11.31229802006989 | h |
| -13.83749007944208 | 0.40043165868259   | 13.52695592976333 | h |
| -13.07345327942664 | 7.30058189882745   | 17.67748513241015 | h |
| -15.87611732957407 | 6.57050331895618   | 16.02854623421948 | h |
| -14.40293426017793 | 4.27313490156145   | 17.93548310641088 | h |
| -5.78720860962572  | 11.89046705039776  | 27.37336222555222 | h |
| -3.07172626963619  | 12.19728320997445  | 25.41600425456585 | h |
| -6.18850281096904  | 15.19512257214978  | 23.98132449703432 | h |
| -6.04534297374830  | 12.75145163672732  | 21.68114100209183 | h |
| -10.67369816821734 | 15.95480795704980  | 22.56992817430321 | h |
| -10.40587984907160 | 13.40464788580058  | 20.40141799479821 | h |
| 3.53423988909934   | -7.91013667374616  | 13.95445386586808 | h |
| -0.99154002989752  | -10.30850007562801 | 9.20176282846334  | h |
| 2.13603363268591   | -9.06991189999125  | 9.40046038664745  | h |
| 1.50824387075712   | -12.24525266204351 | 10.33574000104713 | h |
| -14.83950426425717 | 14.35213931826351  | 21.94723695423125 | h |
| -13.86533228227026 | 13.41351118781264  | 25.02195925085010 | h |
| -16.49411611562509 | 7.70205510308546   | 22.54598465862972 | h |
| -16.58910683682812 | 9.82080974783622   | 25.15480954854250 | h |
| -17.86843067937737 | 10.75309919623327  | 22.18202892245298 | h |
| -8.36588277389960  | 8.12639581009529   | 22.86794599664606 | h |
| -11.15056993683729 | 8.20736336579889   | 22.10916606975111 | h |
| -7.46045303798265  | -2.41209700361370  | 12.22615323471805 | h |
| -4.51189163187393  | -2.82434836191508  | 12.92525084219987 | h |
| -10.51337422200202 | -5.59296310481843  | 12.02453136264694 | h |
| -11.90108692651038 | -2.99137726530897  | 12.00414540766312 | h |
| -15.92054695251482 | -0.35051137542619  | 9.18093905290487  | h |
| -2.95849403051204  | 7.46520293905473   | 9.40019403550961  | h |
| -4.02795844728221  | 8.11757309977025   | 12.12206435756901 | h |
| -0.12856422435430  | 7.91281898032768   | 6.09144528199781  | h |
| -2.43883353273846  | 9.73159259219490   | 5.72169740858981  | h |
| 4.20627159877257   | 7.37135942780991   | 5.62233478415335  | h |
| 4.49716843105441   | 6.55099632211962   | 1.41517863752343  | h |
| 1.63819006427591   | 4.86967236851025   | 1.66836576930695  | h |
| 5.83460822793656   | 2.33400645459992   | 1.34691980579862  | h |
| 6.44675123017304   | 3.29837469093461   | 4.44506820724257  | h |
| 4.71350957918918   | -1.01887495028965  | 4.23779284515138  | h |
| 2.07159458476737   | 0.00924437572697   | 2.57205214179842  | h |
| -2.12863945032801  | -4.70240092756439  | 13.60266650094845 | o |
| -1.73691694701857  | -6.29779500058951  | 12.77424993903919 | h |
| -1.41178066447455  | -4.98483142429304  | 15.27512312374007 | h |
| 4.75768560282706   | 1.30538730945849   | 20.78386180458812 | h |
| 5.33536189827954   | 1.83373268283765   | 24.02771141665961 | h |
| 5.81840377540176   | -2.64147130445351  | 23.17986440232496 | h |
| 3.15832570241565   | -2.12926812698522  | 25.16200011168025 | h |

|                   |                    |                   |   |
|-------------------|--------------------|-------------------|---|
| 1.06418537782050  | -5.74494897905715  | 23.98858653511260 | h |
| 3.44733811277575  | -6.76322777034047  | 21.86762012140664 | h |
| -1.08231498041061 | -8.30902736124520  | 21.01526764093612 | h |
| -1.85970027603975 | -5.14168798451276  | 20.27473607857360 | h |
| 3.07263414451121  | -9.68882807628897  | 18.35243469367024 | h |
| -0.02236533008242 | -10.71200579635802 | 17.54534361859583 | h |
| 3.30697926850429  | -11.24561138044594 | 14.22242425616843 | h |

\$user-defined bonds  
\$end

[La-Motex.6Water]^{+}:  
\$symmetry c1  
\$dft  
functional b-p  
gridsize 5

\$COORD

|                    |                   |                   |    |
|--------------------|-------------------|-------------------|----|
| 2.37627951837409   | 0.55264018772309  | 6.92315426424645  | c  |
| -0.35467976410139  | 0.48083356726222  | 7.18831244127932  | c  |
| -0.98155577303991  | 0.70523237906417  | 9.67254888776103  | n  |
| 1.21842059025266   | 0.97053109500019  | 11.02375850256186 | c  |
| 3.35798819258775   | 0.85727654939439  | 9.35262885557002  | c  |
| -2.17826988254456  | 0.30839668043261  | 5.22972969035714  | c  |
| -4.80669800940998  | 0.67491823313653  | 5.31495174538778  | c  |
| -6.23020917371665  | 1.35267253067852  | 7.40310118791872  | n  |
| -8.65396276009013  | 1.81884419068516  | 6.53756252820058  | c  |
| -8.79742609404522  | 1.30950769882950  | 3.81859640812724  | c  |
| -6.41551873534172  | 0.60017798014472  | 3.06112205336994  | c  |
| -10.69701166676350 | 2.78369540480305  | 7.92482191649759  | c  |
| -10.86235181558644 | 3.52855423325105  | 10.49705868899082 | c  |
| -8.93415520540648  | 3.24898035717391  | 12.17567530211067 | n  |
| -9.69978634454329  | 4.23033749782212  | 14.45308220752783 | c  |
| -12.23216768263243 | 5.18933995293327  | 14.24834510036671 | c  |
| -12.99491252477734 | 4.72507238418550  | 11.75489565544016 | c  |
| -8.01161589378838  | 4.18146148552987  | 16.55977666679742 | c  |
| -5.76764562893544  | 3.10980452723928  | 16.27764555887000 | n  |
| -5.02332680012447  | 0.64638478479298  | 12.06724692929585 | la |
| -8.10539511219256  | -3.06712125082148 | 12.57867360467435 | o  |
| -15.49932020119557 | 5.39138735072725  | 10.57809601460603 | c  |
| -17.75573329744838 | 3.70589021775624  | 11.37292741088061 | c  |
| -17.32533939102312 | 0.87965268202988  | 11.00506730351904 | c  |
| -15.59957049354691 | -0.14537888025638 | 12.86694801945917 | o  |
| -13.73203363766396 | 6.44604033933133  | 16.29240674156753 | c  |
| -5.56857932403593  | -0.13365566961168 | 0.45702579752396  | c  |
| -5.36096888554152  | -3.01009699462396 | 0.05748983539015  | c  |
| -11.12880370149142 | 1.52710228368138  | 2.22079184394065  | c  |
| -12.86657901115853 | -0.80451608661105 | 2.36530704306057  | c  |
| 1.10748730652450   | 1.43535126333083  | 13.67431944500330 | c  |
| -1.10177502141039  | 1.59917837415840  | 14.81800638134733 | n  |
| -1.45774555372612  | 2.11811891112894  | 17.36834385566723 | c  |
| -3.91728096706403  | 2.95059108937234  | 18.14811414135893 | c  |
| -4.32068150266879  | 3.53609636988252  | 20.71962143021069 | c  |
| -2.42112593504742  | 3.22587291254364  | 22.50995455737860 | c  |
| 0.00206062853065   | 2.29488707764096  | 21.73768233615635 | c  |
| 0.44368736872006   | 1.80375756209972  | 19.20246416024212 | c  |
| 1.68707435539002   | 1.93156408405444  | 23.65486306313802 | o  |
| 4.13712039150601   | 0.89041923140642  | 23.14237070305873 | c  |
| 4.18359475319883   | -1.97757216012512 | 23.28919640383429 | c  |
| 2.75925602231027   | -3.00462475971769 | 21.25391822811693 | o  |
| 2.49974009519149   | -5.67522535520191 | 21.32942478205091 | c  |

|                    |                   |                   |   |
|--------------------|-------------------|-------------------|---|
| 0.32036026921586   | -6.44058876433874 | 19.61638823324103 | c |
| 0.68559703234094   | -5.83091834030367 | 16.99807556787900 | o |
| 2.19454522147303   | -7.63969963778009 | 15.66514531637398 | c |
| 2.52871701063916   | -6.86637271492515 | 12.93152878817654 | c |
| 0.22787093421856   | -7.22144828176770 | 11.53953792195213 | o |
| 0.60074297147379   | -6.90323439824282 | 8.87186958156892  | c |
| -2.61783486405333  | 3.65288402245832  | 25.03502437830853 | o |
| -4.96953687425086  | 4.34453714318772  | 26.20882653254398 | c |
| -4.90824567398456  | 7.05892964325812  | 27.11993083457925 | c |
| -5.29830747121074  | 8.73930162554663  | 25.04391048876154 | o |
| -4.99104824370519  | 11.34524704664656 | 25.71928959057940 | c |
| -6.41018951115539  | 12.97010963244429 | 23.84376284240465 | c |
| -9.04236923944650  | 12.63394217407073 | 24.28557633867393 | o |
| -10.60664966608032 | 13.80320413461112 | 22.43623188400540 | c |
| -13.33798228508396 | 13.22102523938448 | 23.04548118827766 | c |
| -13.84836056548151 | 10.61111061130048 | 22.57466343396412 | o |
| -16.32616209797904 | 9.89962450034063  | 23.35977657679150 | c |
| 6.08446584929000   | 1.08458235257692  | 10.09045688702691 | c |
| 3.84169410819444   | 0.41760676702990  | 4.49674672031898  | c |
| 5.01900160339459   | 2.92070085765297  | 3.55322364091007  | c |
| 3.17581559756744   | 5.02701510544352  | 2.85084558508289  | c |
| 1.94452128116146   | 6.18117072248019  | 4.98663466006412  | o |
| -3.71716417748856  | 5.47012650168228  | 11.38291307146669 | o |
| -12.89474024958811 | -4.37070605203169 | 11.99813685045777 | o |
| -3.09097113269576  | 6.73448559175237  | 6.50529833232904  | o |
| -9.63979116082778  | 7.05731628174009  | 22.17016467144823 | o |
| -1.42414221808305  | -0.04773663331553 | 3.34366898717341  | h |
| 2.88777892151445   | 1.75788831234777  | 14.69425221158884 | h |
| 2.23123989541850   | 0.97671972464688  | 18.62441307680451 | h |
| -6.17051353904094  | 4.23247935712623  | 21.29254916099637 | h |
| -8.60641574668297  | 5.07591812057041  | 18.33949192195102 | h |
| -12.40895255077031 | 3.08347324387711  | 6.81600443788780  | h |
| -10.57594619208366 | 1.83887101772433  | 0.23968213010386  | h |
| -12.20582712049864 | 3.22114492309443  | 2.77488183129820  | h |
| -14.55939181303784 | -0.53593927550883 | 1.19155342402290  | h |
| -11.88471642148829 | -2.50658877181283 | 1.69448600911673  | h |
| -13.47916768196025 | -1.17003008753556 | 4.31567991276208  | h |
| -3.72605954343528  | 0.74506480420849  | 0.03898632591086  | h |
| -6.89469223715681  | 0.65099220008962  | -0.94016218014685 | h |
| -4.73684796352102  | -3.44338489391775 | -1.87598377319074 | h |
| -4.00165309180001  | -3.85731821031987 | 1.37991404556924  | h |
| -7.19355018348551  | -3.93683504066662 | 0.363808936834487 | h |
| 6.69965819334308   | 3.07029614967530  | 10.23255540898968 | h |
| 6.46310484816160   | 0.20919255615291  | 11.93636463311356 | h |
| 7.32408027265225   | 0.16402867813889  | 8.70021101619912  | h |
| -5.14810865186902  | 3.09976829735744  | 27.86554851436457 | h |
| -6.60231314660461  | 4.01562065278715  | 24.96953090530792 | h |
| -3.06787113097314  | 7.44087233870538  | 28.03070684924224 | h |
| -6.41293953365351  | 7.32713175035862  | 28.54953910739028 | h |
| -15.32331206728135 | 5.32601130450786  | 8.50613420164558  | h |
| -15.97863685233171 | 7.36657065687655  | 11.04030887051006 | h |
| -19.42360719944001 | 4.26722899975687  | 10.25957054141258 | h |
| -18.23940726133542 | 4.04020408914584  | 13.36978965397139 | h |
| -19.10004298585484 | -0.17054054931737 | 11.24743035804302 | h |
| -14.25937063964997 | 1.12519601945822  | 13.07972351508217 | h |
| -12.50602513852270 | 7.25025033310560  | 17.75911451620940 | h |
| -14.90776418578624 | 7.97932630051051  | 15.52432984864019 | h |
| -15.01858483187613 | 5.10759524543329  | 17.23640539620914 | h |
| -5.75688270326348  | 11.68610054990280 | 27.63153923734050 | h |
| -2.96351661717790  | 11.84627400390512 | 25.71907187070675 | h |

|                    |                   |                   |   |
|--------------------|-------------------|-------------------|---|
| -5.85934742497762  | 14.97299034180102 | 24.10438320587545 | h |
| -5.91027914961360  | 12.41171472401861 | 21.89053627516966 | h |
| -10.34272227652579 | 15.88014180226747 | 22.44738161268648 | h |
| -10.12984224355469 | 13.10203435668322 | 20.52377207957875 | h |
| 3.14610685399779   | -4.87451368689943 | 12.80217174810949 | h |
| -1.22551112819336  | -7.26098123572096 | 7.96265835208742  | h |
| 1.23933198219929   | -4.97027828867158 | 8.42235155457933  | h |
| 1.99812912303391   | -8.27921519399480 | 8.16725392435900  | h |
| -14.58156520112371 | 14.41532741321234 | 21.86101090274089 | h |
| -13.71917918994126 | 13.67340516951065 | 25.05058402753974 | h |
| -16.54381699641930 | 7.88179159826327  | 22.94489780000526 | h |
| -16.58785929838300 | 10.21268754544270 | 25.40639362128771 | h |
| -17.78203936957648 | 10.97696615200508 | 22.32211567516445 | h |
| -8.30252866327170  | 7.91657753309164  | 23.13079281665538 | h |
| -11.12001069834794 | 8.14888951692106  | 22.42282199439844 | h |
| -9.92416203865969  | -3.61900460341188 | 12.37157226151948 | h |
| -7.11894160227698  | -4.46489703818148 | 13.26575389872464 | h |
| -13.57709581393490 | -5.70669817670280 | 13.05433500926047 | h |
| -14.01648743893832 | -2.86899148790210 | 12.28343174914277 | h |
| -16.60501796334886 | 0.48663680543782  | 9.08455271596193  | h |
| -3.39128648380309  | 5.98880497322119  | 9.58136403005882  | h |
| -5.13879685186796  | 6.50172169713166  | 11.92225135658497 | h |
| -1.33316015789812  | 6.55352877501269  | 5.89778589039995  | h |
| -3.97884075110599  | 5.28660800949874  | 5.78926124253530  | h |
| 3.22898308157026   | 6.79918489866867  | 6.14600562308160  | h |
| 4.17139833059729   | 6.49106851111298  | 1.74674246239261  | h |
| 1.63162849631015   | 4.29854191120343  | 1.66573390694372  | h |
| 6.15769560018218   | 2.50428403449717  | 1.85740239475970  | h |
| 6.36606236547760   | 3.64985530808810  | 4.96938293554790  | h |
| 5.39852064739340   | -0.95364551626210 | 4.71153952792456  | h |
| 2.63214769529721   | -0.34840302637748 | 2.98521326181058  | h |
| -3.18974295216716  | -4.00166788419210 | 13.73563512829065 | o |
| -2.18539408747775  | -5.15100311916954 | 12.63446042707439 | h |
| -2.17261325598300  | -4.10519753248808 | 15.28793930550065 | h |
| 4.87720455390741   | 1.56599264429221  | 21.31914847099643 | h |
| 5.35911420783750   | 1.64036102497439  | 24.64569881439127 | h |
| 6.18081271325420   | -2.61053759378185 | 23.21262786464726 | h |
| 3.38294152459538   | -2.59698384624556 | 25.11990393241874 | h |
| 2.03915347294221   | -6.32236195785072 | 23.26713248936912 | h |
| 4.29074888974260   | -6.60853709424941 | 20.77620843533238 | h |
| -0.04477769381513  | -8.48619850567588 | 19.83385030119473 | h |
| -1.38140990883673  | -5.40437658460228 | 20.20296030350014 | h |
| 4.09350626552826   | -7.77344627326746 | 16.52355579490272 | h |
| 1.30076667101228   | -9.52670397199269 | 15.76530926230260 | h |
| 4.01938797948481   | -8.06763190788809 | 12.09611414192769 | h |

\$user-defined bonds  
\$end

[Gd-Motex.6Water]^{:+}:

\$symmetry c1

\$dft

functional b-p

gridsize 5

Energy: -3390.918764991

\$coord

|                   |                  |                   |   |
|-------------------|------------------|-------------------|---|
| 2.08602231978519  | 0.95677121224706 | 6.32009707331678  | c |
| -0.62796587243339 | 1.22766670833409 | 6.60747565193167  | c |
| -1.21446090672737 | 1.40634162610609 | 9.10377176458157  | n |
| 1.00554993898655  | 1.25992214095016 | 10.44715093367335 | c |
| 3.10466803798284  | 0.95201266382240 | 8.75247237573294  | c |

|                    |                   |                   |    |
|--------------------|-------------------|-------------------|----|
| -2.47642263329118  | 1.31796333238524  | 4.67112161060199  | c  |
| -5.09116028846905  | 1.74252300986904  | 4.83679076067404  | c  |
| -6.47644670402966  | 2.28360404479262  | 6.99146866054598  | n  |
| -8.93825591161322  | 2.69997333407954  | 6.20115511808883  | c  |
| -9.12681995643642  | 2.35294185910373  | 3.46169582552196  | c  |
| -6.74340293423131  | 1.76698538790956  | 2.61475175827675  | c  |
| -11.00857617590524 | 3.40499983486556  | 7.69299386039837  | c  |
| -11.14818792893574 | 3.92331053569867  | 10.31965006083974 | c  |
| -9.10022976093195  | 3.85358607065701  | 11.87589813049334 | n  |
| -9.89681192675079  | 4.45365907588203  | 14.27609411939143 | c  |
| -12.56398522858069 | 4.95220485860099  | 14.27332426592236 | c  |
| -13.37671944256543 | 4.57821304396576  | 11.77880115223643 | c  |
| -8.14548150444386  | 4.34588150199099  | 16.32216807587734 | c  |
| -5.81154963023999  | 3.55802895816464  | 15.86402004221375 | n  |
| -4.99368596447938  | 2.11025178598614  | 11.43118919124310 | gd |
| -6.18835633189680  | -2.03551648414776 | 12.52903907296030 | o  |
| -16.04638008890131 | 4.68266467875503  | 10.80948727616991 | c  |
| -17.69599851551332 | 2.36510157917686  | 11.51733674674742 | c  |
| -16.49898609861573 | -0.19722170556688 | 10.93848752243952 | c  |
| -14.54940923030815 | -0.85945711296608 | 12.74295633130418 | o  |
| -14.14766638391583 | 5.67877662751063  | 16.50359424657297 | c  |
| -5.93659997120842  | 1.20011552600009  | -0.04348909141016 | c  |
| -5.72177231765369  | -1.64528485128693 | -0.62459517518689 | c  |
| -11.50061553386720 | 2.58356234854345  | 1.92864032414065  | c  |
| -13.14645130261583 | 0.18172015885019  | 1.94381306992671  | c  |
| 0.93795375918386   | 1.51409026912010  | 13.11775020412933 | c  |
| -1.25242839349079  | 1.90995577881761  | 14.26766814788994 | n  |
| -1.55350313428901  | 2.28653810523930  | 16.85235272670946 | c  |
| -3.95542711580664  | 3.21480610159270  | 17.70052393523835 | c  |
| -4.30361844195520  | 3.70327922198112  | 20.30032796111082 | c  |
| -2.39342351612306  | 3.25976604314550  | 22.04530449836621 | c  |
| -0.00707593326805  | 2.28039784999017  | 21.20412732709558 | c  |
| 0.35386313338282   | 1.79821764472332  | 18.65034470613661 | c  |
| 1.71112726474480   | 1.91838628239516  | 23.07521193754417 | o  |
| 4.20502948611886   | 0.98602027813410  | 22.54598038283655 | c  |
| 4.51930060552866   | -1.72148291415706 | 23.42130608749970 | c  |
| 3.02184510649883   | -3.36867154925021 | 21.92165569870652 | o  |
| 3.28271598736702   | -5.93017103801440 | 22.72155508932287 | c  |
| 1.39134778652494   | -7.61050712119585 | 21.39564577065286 | c  |
| 2.02033145458990   | -7.86056227917745 | 18.79030589292743 | o  |
| 0.52843725291730   | -9.74019351016313 | 17.57801786570307 | c  |
| 1.18637325889030   | -9.84241137946483 | 14.80050356234699 | c  |
| 0.27187211699325   | -7.62277264358990 | 13.55141464798331 | o  |
| 0.77931434952143   | -7.63229259792866 | 10.90137771013779 | c  |
| -2.52813553944417  | 3.63413680006991  | 24.57992547236690 | o  |
| -4.85664920002019  | 4.29231668355370  | 25.82045696004629 | c  |
| -4.82389620604333  | 7.00854358160510  | 26.72782511406713 | c  |
| -5.31272568447774  | 8.68000166598525  | 24.66462741846242 | o  |
| -5.02111499692823  | 11.29126907184757 | 25.32559596749227 | c  |
| -6.46093637506373  | 12.89390791759272 | 23.44671253408263 | c  |
| -9.08854805117580  | 12.55516806251823 | 23.91222020322390 | o  |
| -10.66989857473472 | 13.68470626176204 | 22.05248893931778 | c  |
| -13.39710847581278 | 13.14288404222930 | 22.71494397847420 | c  |
| -13.93534971055711 | 10.52388504604480 | 22.33244748109625 | o  |
| -16.40160337057591 | 9.85558776382469  | 23.19152459826111 | c  |
| 5.82980165094132   | 0.69594969422262  | 9.48221865725097  | c  |
| 3.51314812282398   | 0.78614086968302  | 3.87488993848402  | c  |
| 5.01522502746088   | 3.17235181713761  | 3.10531194089602  | c  |
| 3.47761792465037   | 5.55652128465144  | 2.58193227615663  | c  |
| 2.38616965957844   | 6.69007452730554  | 4.80849444822497  | o  |

|                    |                   |                   |   |
|--------------------|-------------------|-------------------|---|
| -3.72157792594600  | 6.56106111487030  | 10.85425378715779 | o |
| -10.69939337113225 | -4.18860782209055 | 11.92957804755547 | o |
| -2.60688928405069  | 7.60505658412855  | 6.12391445605679  | o |
| -9.77329016890458  | 6.92175748849394  | 22.05183222389632 | o |
| -1.77295575951602  | 1.02905284979684  | 2.75505503774359  | h |
| 2.72899074467182   | 1.45739558213486  | 14.16305744309245 | h |
| 2.11681699754274   | 0.95626555368712  | 18.01426273370710 | h |
| -6.10358438694958  | 4.47478958991859  | 20.93053021963355 | h |
| -8.79315871206218  | 4.89304577588186  | 18.21834378050668 | h |
| -12.77837114474214 | 3.61660382665050  | 6.65810706406680  | h |
| -11.00105917386601 | 3.04751475910956  | -0.03673223469055 | h |
| -12.62823011351692 | 4.19356882513353  | 2.61589837126533  | h |
| -14.86744353354871 | 0.46177573281630  | 0.81492638071006  | h |
| -12.11339263123858 | -1.43461172253764 | 1.14991061550747  | h |
| -13.71455209743706 | -0.33267077821782 | 3.87422163602766  | h |
| -4.10744668329868  | 2.11622679446137  | -0.43810034919219 | h |
| -7.29181461288687  | 2.06146805469854  | -1.36568867161198 | h |
| -5.11515664312917  | -1.95164914311399 | -2.58752254462338 | h |
| -4.34895701722646  | -2.57097306958537 | 0.62903525338786  | h |
| -7.54775894894066  | -2.59725593871395 | -0.36098844872997 | h |
| 6.72509647561421   | 2.54050660513659  | 9.85295089505278  | h |
| 6.06042813713184   | -0.44194849134186 | 11.20501762039042 | h |
| 6.93007130250713   | -0.22401005712400 | 7.98008831083460  | h |
| -4.95912878705382  | 3.04757584324775  | 27.48311884537569 | h |
| -6.51641443915137  | 3.92257754590099  | 24.62841912172165 | h |
| -2.96490688612374  | 7.42995784288727  | 27.58144860239723 | h |
| -6.28873720200913  | 7.24630252980195  | 28.20319318282616 | h |
| -16.02058087712374 | 4.87127498475772  | 8.73810419482178  | h |
| -16.99386376551676 | 6.39528335747345  | 11.52345472895947 | h |
| -19.49969751981810 | 2.49960798661425  | 10.48580060868413 | h |
| -18.17188342047680 | 2.41401065642582  | 13.54338687894509 | h |
| -17.91617225816600 | -1.70853932582271 | 11.07038303999404 | h |
| -13.59983065846706 | 0.70105025876033  | 13.07008301762625 | h |
| -13.04059231337136 | 6.71931403899491  | 17.91558564408734 | h |
| -15.74391136227340 | 6.87721737555843  | 15.92613710311300 | h |
| -14.94769116302673 | 4.01069653799633  | 17.46021960850646 | h |
| -5.77960151744114  | 11.63711638347527 | 27.24006081758897 | h |
| -2.99727592349027  | 11.80689482269802 | 25.31227742066257 | h |
| -5.91490874632211  | 14.90103492327004 | 23.68278282915584 | h |
| -5.97399681986004  | 12.31727885865052 | 21.49540002141977 | h |
| -10.39034229475715 | 15.75896941429698 | 22.00252660219305 | h |
| -10.22452298613394 | 12.92696194089204 | 20.15385563001165 | h |
| 3.25669548339872   | -9.97661829373237 | 14.55917615652189 | h |
| 0.02292543083359   | -5.86750132263497 | 10.12547796315372 | h |
| 2.83135832529336   | -7.72145575061035 | 10.54272855010535 | h |
| -0.14489938211824  | -9.25313474564713 | 9.96767179785815  | h |
| -14.64675664894648 | 14.31002910214335 | 21.51013990192691 | h |
| -13.74772962620285 | 13.66031899983282 | 24.70971094551014 | h |
| -16.64277577604179 | 7.82799531989900  | 22.84270216115693 | h |
| -16.61607654346233 | 10.23224010932979 | 25.23268967287371 | h |
| -17.87105932721290 | 10.91301438359945 | 22.15290623601249 | h |
| -8.41800159682855  | 7.81894391342437  | 22.95063884466448 | h |
| -11.23917336771484 | 8.04153597099899  | 22.26472841714284 | h |
| -7.88625025837415  | -2.88502824221409 | 12.33570816502602 | h |
| -5.14379439647012  | -3.05351820016152 | 13.75263080350046 | h |
| -11.04016663801906 | -5.65890208740512 | 12.97308429712517 | h |
| -12.18944526994367 | -3.04961204677235 | 12.15683357359698 | h |
| -15.70876187894973 | -0.22617429886843 | 9.00567760372032  | h |
| -3.21406420737637  | 7.05173329386689  | 9.06446700073428  | h |
| -4.88645396225869  | 7.85583361441627  | 11.43317932068638 | h |



|                   |                    |                   |   |
|-------------------|--------------------|-------------------|---|
| -0.81432316681281 | 7.32939276764164   | 5.65012844642099  | h |
| -3.51429815918259 | 6.24643796657557   | 5.26734270156833  | h |
| 3.70651993815393  | 6.90555786110217   | 6.06804794173816  | h |
| 4.67430269567501  | 6.96226521561762   | 1.61072441515147  | h |
| 1.86455380535959  | 5.14616239729048   | 1.33739651992888  | h |
| 6.08525939848762  | 2.73836445699452   | 1.37003339792719  | h |
| 6.45209736711984  | 3.60404816410545   | 4.55537309148962  | h |
| 4.86865435723010  | -0.79480022414414  | 3.97666283287565  | h |
| 2.20863614687663  | 0.30003691248522   | 2.32774308025136  | h |
| -3.26653621660153 | -4.55831736195507  | 15.76399620616411 | o |
| -1.95355239375045 | -5.63771272779230  | 14.96312696123660 | h |
| -2.35297217609663 | -3.43656244649949  | 16.89914616680095 | h |
| 4.69512026300780  | 1.18549099676945   | 20.53964489197855 | h |
| 5.49800215163042  | 2.18797827899593   | 23.64534229557106 | h |
| 6.55179387808902  | -2.21809735588370  | 23.27960933617575 | h |
| 3.96956323498893  | -1.87137777060766  | 25.43566068806116 | h |
| 2.94240061155533  | -6.07192612490881  | 24.78274995420359 | h |
| 5.22431776698613  | -6.61190482094330  | 22.34296248636290 | h |
| 1.43222342885449  | -9.48450293813459  | 22.33142771894764 | h |
| -0.53878518499874 | -6.83224834682074  | 21.61181321593761 | h |
| 0.89937496850055  | -11.62348212854479 | 18.41790130574041 | h |
| -1.51119392399069 | -9.33287583791463  | 17.81214888411960 | h |
| 0.31236356733070  | -11.54169628045360 | 13.95188883346288 | h |

\$user-defined bonds  
\$end

[Lu-Motex.6Water]^{+}:

\$symmetry c1

\$dft

functional b-p

gridsize 5

energy: -3395.016139119

\$coord

|                    |                   |                   |    |
|--------------------|-------------------|-------------------|----|
| 2.10076763033319   | 0.64137263320681  | 6.79548756655134  | c  |
| -0.60755419999663  | 0.97014680564924  | 7.03553516873562  | c  |
| -1.24468315981352  | 1.24373985461390  | 9.51406606596387  | n  |
| 0.95814213355190   | 1.07980983062548  | 10.88292197602178 | c  |
| 3.07943842366778   | 0.68742049003993  | 9.24200198243275  | c  |
| -2.40690795616692  | 1.00551504266157  | 5.06451754243233  | c  |
| -5.01094157335982  | 1.45162306137491  | 5.19955038468145  | c  |
| -6.40059568611579  | 2.10100023448523  | 7.32361627863173  | n  |
| -8.85390437025931  | 2.46199252674622  | 6.47781054136668  | c  |
| -9.02490852829005  | 1.98599326859395  | 3.75878821739247  | c  |
| -6.63723451770171  | 1.36442652640392  | 2.96288999079131  | c  |
| -10.94138006660291 | 3.22681814676463  | 7.89911074460853  | c  |
| -11.08531603940490 | 3.83271811553205  | 10.49543963476142 | c  |
| -9.05428573751204  | 3.74297421716611  | 12.07764709028685 | n  |
| -9.88093626434181  | 4.48374306547651  | 14.42907008081207 | c  |
| -12.52431768343909 | 5.07281678252947  | 14.37075472040530 | c  |
| -13.31153924326232 | 4.62513033903465  | 11.88375633843466 | c  |
| -8.16495870781137  | 4.43649635991229  | 16.49071570037176 | c  |
| -5.84353315126135  | 3.60601311902065  | 16.06692990422910 | n  |
| -4.93944767588692  | 2.23748319407476  | 11.70506641331449 | lu |
| -6.17053804639766  | -1.74990098269451 | 12.53891335173165 | o  |
| -15.95622454285946 | 4.80260740288941  | 10.85827146605728 | c  |
| -17.70647143983794 | 2.56913363923653  | 11.59298978278850 | c  |
| -16.59943335501703 | -0.04762890183832 | 11.08795850407445 | c  |
| -14.69040610222467 | -0.73447740763224 | 12.92544436193282 | o  |
| -14.10453658135190 | 5.95215602405948  | 16.54753788416642 | c  |
| -5.80498035393907  | 0.66324165578422  | 0.34494280602235  | c  |

|                    |                   |                   |   |
|--------------------|-------------------|-------------------|---|
| -5.58480377665940  | -2.20787885922043 | -0.08829512193123 | c |
| -11.38705372166975 | 2.13929687274276  | 2.19837202921355  | c |
| -13.02580394227130 | -0.26480712599507 | 2.30378006014683  | c |
| 0.84518670034206   | 1.38913594596650  | 13.53541425951950 | c |
| -1.36480166184696  | 1.86294993295375  | 14.60408809403132 | n |
| -1.66711788646742  | 2.28990181674498  | 17.17664875598057 | c |
| -4.04733733921838  | 3.28791721638016  | 17.96189352152087 | c |
| -4.43415176903897  | 3.84345018847366  | 20.54264893832996 | c |
| -2.56289887209505  | 3.37995716049185  | 22.32576932170309 | c |
| -0.20194025024338  | 2.30115079520966  | 21.54243555591193 | c |
| 0.19775234679932   | 1.77569454254482  | 19.00648889694674 | c |
| 1.46933047903481   | 1.87208450112770  | 23.45318852041774 | o |
| 3.93807224066732   | 0.88118462462550  | 22.93037628013068 | c |
| 4.06455252991213   | -1.96656998681252 | 23.24990271504457 | c |
| 2.60507218268690   | -3.15685912823472 | 21.33407311933719 | o |
| 2.41456634585951   | -5.82033781931292 | 21.63861563121170 | c |
| 0.27941001863676   | -6.80240034004729 | 19.98776835070245 | c |
| 0.70431667970228   | -6.50795279949708 | 17.32511032890291 | o |
| 2.19170964375146   | -8.49165935981671 | 16.23734800829162 | c |
| 2.51971820642515   | -8.08200335970059 | 13.42441748475264 | c |
| 0.24356103554278   | -8.67763120712146 | 12.09140599911494 | o |
| 0.59175948132843   | -8.58528536330723 | 9.41210095642570  | c |
| -2.72351481594666  | 3.80998470737814  | 24.85201098437200 | o |
| -5.04022464847452  | 4.59380768538358  | 26.03786738340726 | c |
| -4.92754659497260  | 7.33893356590249  | 26.84822088002417 | c |
| -5.37124229156133  | 8.95329993233966  | 24.72928785687772 | o |
| -5.01792232009165  | 11.57774886670932 | 25.30378915261058 | c |
| -6.50349648591392  | 13.15176420867617 | 23.43573615832657 | c |
| -9.11630877981532  | 12.85510713466824 | 24.00092756067484 | o |
| -10.75111609238543 | 13.97006113281248 | 22.17903777677471 | c |
| -13.45788014279433 | 13.44484073098802 | 22.93265514177347 | c |
| -14.01912325608120 | 10.82669189360351 | 22.58153583767032 | o |
| -16.45822638079295 | 10.17279708515890 | 23.52456144345589 | c |
| 5.78920524619867   | 0.42334749538194  | 10.02511973576363 | c |
| 3.56050522185463   | 0.38374413137175  | 4.37772317326517  | c |
| 5.08983014295982   | 2.73545452704895  | 3.55684718243461  | c |
| 3.57825734925697   | 5.11151640092852  | 2.93045560630347  | c |
| 2.46706350858082   | 6.33215950884964  | 5.10126757795411  | o |
| -3.70134025967098  | 6.45589107293016  | 11.00499272523649 | o |
| -10.70802453417479 | -3.86485454835434 | 11.94813646548375 | o |
| -2.53060574669571  | 7.31391223012152  | 6.29389912596461  | o |
| -9.86469655693433  | 7.22409790129505  | 22.14506467545344 | o |
| -1.68179501042187  | 0.63431683996890  | 3.17154136259107  | h |
| 2.60035499019497   | 1.31212947274734  | 14.63518047012811 | h |
| 1.920161519852539  | 0.81770874062957  | 18.43610685134166 | h |
| -6.22128653409236  | 4.67456353658845  | 21.13059436399305 | h |
| -8.81656797198498  | 5.05469308797688  | 18.36174109686041 | h |
| -12.69703269148536 | 3.41352912188241  | 6.83761912158526  | h |
| -10.87094701252491 | 2.51829570333169  | 0.21891317831287  | h |
| -12.52613531506571 | 3.77422872135915  | 2.80290614181132  | h |
| -14.73856764975431 | -0.03928788465922 | 1.15031232075704  | h |
| -11.98162180577645 | -1.91002960771134 | 1.58763831863358  | h |
| -13.60636100205542 | -0.69869940082972 | 4.24996214869959  | h |
| -3.97295619692746  | 1.55936485629659  | -0.08159322364361 | h |
| -7.14978273177383  | 1.45478244791508  | -1.03059192902118 | h |
| -4.96475945474726  | -2.61523957633992 | -2.02869998235712 | h |
| -4.22068585452040  | -3.06639902801410 | 1.22155716170784  | h |
| -7.41223422595108  | -3.14602880975092 | 0.21212249746467  | h |
| 6.73048144986971   | 2.26863474642278  | 10.25065819988454 | h |
| 5.97503172932296   | -0.56780472995039 | 11.84128222277666 | h |

|                    |                    |                   |   |
|--------------------|--------------------|-------------------|---|
| 6.88149087303620   | -0.64535375648644  | 8.61763006753227  | h |
| -5.20227356614584  | 3.41596353623805   | 27.74388144313853 | h |
| -6.69953872062080  | 4.23518827368206   | 24.84133544306279 | h |
| -3.05591456515174  | 7.73407186210844   | 27.68655665863027 | h |
| -6.38317061392473  | 7.67144980759115   | 28.31427766990760 | h |
| -15.88556322149665 | 4.93565057875483   | 8.78367638206261  | h |
| -16.84958434839784 | 6.56801333082041   | 11.51057500581109 | h |
| -19.48865885825748 | 2.74925854947999   | 10.53153810041390 | h |
| -18.20886128426559 | 2.68302589687275   | 13.61019950379160 | h |
| -18.07137120491493 | -1.50403860076539  | 11.23875537812999 | h |
| -13.72687082147754 | 0.81458314159448   | 13.26706380129223 | h |
| -12.95636785667134 | 6.91030438020635   | 17.98459604482609 | h |
| -15.57983658571189 | 7.27227723489135   | 15.91449097842481 | h |
| -15.06919663390364 | 4.36585160882110   | 17.49123106626223 | h |
| -5.70102164763819  | 11.98884453043530  | 27.23327976814366 | h |
| -2.98869585482900  | 12.06120496764950  | 25.20333163658648 | h |
| -5.92661010030499  | 15.15732603945284  | 23.60338821410198 | h |
| -6.09246256146230  | 12.52263299686068  | 21.48306887072634 | h |
| -10.46503672784374 | 16.04237387363002  | 22.09676827934755 | h |
| -10.36901165694864 | 13.18877006785031  | 20.27624140003865 | h |
| 3.08914203518151   | -6.10623936251261  | 13.04549315704180 | h |
| -1.21689750755697  | -9.10669511378764  | 8.54734487396992  | h |
| 1.13583458583459   | -6.67222398207696  | 8.78338899672534  | h |
| 2.05505940098994   | -9.94491479693767  | 8.81215203523045  | h |
| -14.74113887641911 | 14.61135203354728  | 21.76308430579353 | h |
| -13.74091028936842 | 13.97475078033580  | 24.93493210378217 | h |
| -16.72270213190674 | 8.14666212717189   | 23.18458984417342 | h |
| -16.60069204911168 | 10.55099540079569  | 25.57185945650471 | h |
| -17.95638563603796 | 11.23841689125019  | 22.53636135817070 | h |
| -8.49354629533454  | 8.11105018238569   | 23.02975352893912 | h |
| -11.32852167258199 | 8.33713174966049   | 22.40199319493992 | h |
| -7.92058642047906  | -2.47506926440701  | 12.30516284043988 | h |
| -5.07899783775965  | -3.18031943695273  | 13.17738887987911 | h |
| -10.91070561382609 | -5.32811448358645  | 13.03746605398671 | h |
| -12.24728440802212 | -2.80870625427025  | 12.23119805638222 | h |
| -15.79271535810548 | -0.14932167495315  | 9.16428530787858  | h |
| -3.17043099400497  | 6.88904699205648   | 9.19620434773141  | h |
| -4.80662523739224  | 7.80663165632653   | 11.57194699779918 | h |
| -0.73065120606520  | 7.01010307258035   | 5.86067331863476  | h |
| -3.43358644854449  | 5.92699691054793   | 5.47659078048463  | h |
| 3.76368950988735   | 6.54763116350786   | 6.38507237959647  | h |
| 4.79962614001995   | 6.47383687850099   | 1.92876559445378  | h |
| 1.97865383977591   | 4.67068631327076   | 1.67901417022486  | h |
| 6.18658736943953   | 2.23974590898295   | 1.85509269490289  | h |
| 6.50555952202211   | 3.20500633886365   | 5.01618923391946  | h |
| 4.90590929744086   | -1.20021600948890  | 4.54842134453719  | h |
| 2.27596976204110   | -0.14233552367360  | 2.82682386996111  | h |
| -3.59702927447977  | -5.66057921815695  | 14.25450675481396 | o |
| -2.64875375105544  | -6.76776194902996  | 13.09733855333623 | h |
| -2.36283712397285  | -5.48907470549088  | 15.63197445978295 | h |
| 4.60067345305624   | 1.46318269369681   | 21.04731480261295 | h |
| 5.18403044811236   | 1.75353107595179   | 24.34685670987201 | h |
| 6.07436673827813   | -2.55554679220400  | 23.14883348094959 | h |
| 3.33984412794067   | -2.48805722581005  | 25.14202446367259 | h |
| 1.95728607999382   | -6.30032864385518  | 23.62526692169021 | h |
| 4.23607376681145   | -6.74683104969830  | 21.18127543990279 | h |
| -0.07818811271724  | -8.80967619811723  | 20.44163928765363 | h |
| -1.44245569729722  | -5.72007252688403  | 20.41125587874543 | h |
| 4.09007138794618   | -8.52929985687611  | 17.10673939193510 | h |
| 1.28074462149918   | -10.34090397498881 | 16.58162074986839 | h |

```
4.05360207216057 -9.33661884897151 12.75810223010761 h
$user-defined bonds
$end
```

```
[La-Motex.6Water]^{+}:
```

```
$symmetry c1
```

```
$dft
```

```
functional b3-lyp
```

```
gridsize 5
```

```
Energy: -3384.393512314
```

```
$coord
```

```
2.23237473064727 0.41536994173827 6.85413095164339 c
-0.48253857289872 0.45553651296810 7.14490187763018 c
-1.06077213882215 0.76400420415444 9.61566381058862 n
1.14418622152424 0.98871272461998 10.93324215660809 c
3.24582229052415 0.75506594911725 9.25342509863949 c
-2.33227620016084 0.31104245630233 5.21637889549076 c
-4.94080909723509 0.70256793674460 5.32174800141215 c
-6.36166062916642 1.28853011819641 7.40934871058631 n
-8.76443395255106 1.80213394365794 6.57294576530675 c
-8.90752418795911 1.38800833690267 3.83964963922378 c
-6.54662304588647 0.71008603717958 3.06766005532271 c
-10.79323485689931 2.72928557730339 7.98087816268912 c
-10.94946098101075 3.43997353853468 10.56059861160690 c
-9.01162231871851 3.17470103519843 12.20988285092898 n
-9.75140342876125 4.13404867165138 14.48975180319740 c
-12.27977356129026 5.05686738283769 14.31896102383929 c
-13.06392828765936 4.60053810633591 11.84358163799848 c
-8.02417249857279 4.11672501817306 16.56487201754414 c
-5.79861562958967 3.07150186172946 16.27178695179832 n
-5.06603575415177 0.61481996253489 12.04218383073915 la
-8.04520127154016 -3.27003871308356 12.36402502428285 o
-15.59103644924605 5.24736412398248 10.71153829278098 c
-17.81422106856076 3.51954803628522 11.48510234661778 c
-17.41791829960325 0.71900791717004 10.95386334369237 c
-15.68247510992873 -0.43903265620333 12.69901267248585 o
-13.77132822791966 6.28547448356658 16.38502261336372 c
-5.69537636492482 0.08193355543282 0.43962268944759 c
-5.50815111588469 -2.76880263658992 -0.09006802981810 c
-11.23881109576119 1.66705729891015 2.25441615240294 c
-12.99005574630696 -0.65066265259912 2.32850283234226 c
1.06555868881709 1.49633317154915 13.57636951341155 c
-1.10524722675578 1.68930377684434 14.73713887978285 n
-1.44721963916947 2.22494594096187 17.28838858894753 c
-3.89653412302100 2.98150303241239 18.09736940537431 c
-4.27291260578241 3.56249479495563 20.66325193730390 c
-2.34819486430712 3.32908269690420 22.41602159444395 c
0.07671849730703 2.48451491081399 21.61335596559497 c
0.48385367846196 1.98491910169094 19.08941886272058 c
1.81079013445100 2.20753597928140 23.48687160840155 o
4.26002917474522 1.20913856521510 22.99181605207476 c
4.36540227269658 -1.64362873095635 23.24931936839085 c
2.92431203535984 -2.77953691710709 21.30507236067128 o
2.69224884801793 -5.43233548883789 21.48433285680051 c
0.50438595732085 -6.29199674346920 19.83891969667074 c
0.83754881722457 -5.81584817929238 17.20682084642993 o
2.26320942146861 -7.69117385951949 15.91210456411435 c
2.57933594522992 -7.00068630658757 13.15992999704394 c
0.24755928422169 -7.24692626075533 11.83352885883664 o
0.53937809965563 -7.03819527727392 9.16190266347563 c
```

|                    |                   |                   |   |
|--------------------|-------------------|-------------------|---|
| -2.52698850169734  | 3.79615713737604  | 24.92508951356993 | o |
| -4.87879130363037  | 4.19788450793003  | 26.18596504877739 | c |
| -4.98397808418646  | 6.82580230668787  | 27.30256685512856 | c |
| -5.45904512798226  | 8.62401896062873  | 25.36999011289388 | o |
| -5.22008533443977  | 11.17492218893991 | 26.18723966025367 | c |
| -6.46861304403961  | 12.89439253147461 | 24.28369403850563 | c |
| -9.11596509935358  | 12.55661308870772 | 24.45584557176249 | o |
| -10.51786703062519 | 13.85329055566285 | 22.58536793762279 | c |
| -13.29406789657263 | 13.31625534037442 | 22.96639456550123 | c |
| -13.82762534651543 | 10.75801558629055 | 22.35638765839408 | o |
| -16.36892051612113 | 10.07004295536817 | 22.85393591727307 | c |
| 5.98611648010379   | 0.88801714237708  | 9.95754002348309  | c |
| 3.66619117792122   | 0.08241036028289  | 4.42852970529780  | c |
| 5.05671695332069   | 2.41987808142376  | 3.37966930241653  | c |
| 3.42479418787461   | 4.67224572042274  | 2.63550556312036  | c |
| 2.42418167912494   | 6.04878229809514  | 4.74493554574244  | o |
| -4.05825539091793  | 5.53607409166707  | 11.17700401903806 | o |
| -12.85708801017919 | -4.56828846971536 | 11.46444498953366 | o |
| -2.35368600454382  | 7.32981699313981  | 6.58358882869740  | o |
| -9.69077135962455  | 7.03895260065125  | 22.17394755283261 | o |
| -1.60443144638397  | -0.03565201315489 | 3.33815216437125  | h |
| 2.85055121311311   | 1.79071544536260  | 14.56159484936361 | h |
| 2.27814320491706   | 1.23032916539764  | 18.49379026515866 | h |
| -6.11777366393389  | 4.19602206229665  | 21.25976985761966 | h |
| -8.59498023287723  | 5.02445082677965  | 18.32365861479404 | h |
| -12.49817426732197 | 3.04073036821293  | 6.89810011822855  | h |
| -10.69333613581506 | 2.02983895562013  | 0.29705556466711  | h |
| -12.29776396077275 | 3.33718060741179  | 2.85525917522266  | h |
| -14.67225734579813 | -0.33060573271785 | 1.17666767003123  | h |
| -12.02970387208815 | -2.32500674595884 | 1.60200439257537  | h |
| -13.59746478698198 | -1.07365958650885 | 4.25382875222779  | h |
| -3.86040968446255  | 0.96002189622723  | 0.07037827376756  | h |
| -7.00004300194559  | 0.92748737717562  | -0.91775206306605 | h |
| -4.87996658699916  | -3.11170371344092 | -2.02574413363664 | h |
| -4.17304781200549  | -3.68481712694137 | 1.18830408458437  | h |
| -7.33790986988521  | -3.68735050830425 | 0.15814947359214  | h |
| 6.72302223565522   | 2.81996566477595  | 9.87524245834851  | h |
| 6.31886495926665   | 0.20433122857870  | 11.87484405685141 | h |
| 7.14520608886230   | -0.25241089817586 | 8.68664192303562  | h |
| -4.94578632322747  | 2.82722655893081  | 27.73033952529047 | h |
| -6.49751215202039  | 3.86270883184121  | 24.95953140824624 | h |
| -3.18482452278298  | 7.23873399004806  | 28.24468838125969 | h |
| -6.49413203119757  | 6.89650051648467  | 28.72568460276895 | h |
| -15.44360850557436 | 5.23704357825188  | 8.65195280319102  | h |
| -16.09330738363753 | 7.18724209970245  | 11.22604201168092 | h |
| -19.49984140126864 | 4.13549331627163  | 10.45765763434768 | h |
| -18.23599592559507 | 3.74879192423131  | 13.49529026625624 | h |
| -19.19096619504517 | -0.31005999135235 | 11.16768374322904 | h |
| -14.34218428625205 | 0.76822364455132  | 13.02221119670469 | h |
| -12.54635035198606 | 7.10634208576277  | 17.82127784005099 | h |
| -14.97186826269598 | 7.79088598011332  | 15.64007722856430 | h |
| -15.01311028829175 | 4.93357693940631  | 17.33838712294232 | h |
| -6.13484081256718  | 11.42466674963473 | 28.03003614279818 | h |
| -3.21547628323141  | 11.66866975552803 | 26.37767468953800 | h |
| -5.95295712063413  | 14.86325637304871 | 24.69861019841986 | h |
| -5.79377261131213  | 12.44148401704146 | 22.37417857784153 | h |
| -10.21132760758238 | 15.90274322603269 | 22.73229615255047 | h |
| -9.93074806018993  | 13.25016818969908 | 20.68839103964828 | h |
| 3.29968933095218   | -5.06562410313643 | 12.97939648255603 | h |
| -1.32239578546267  | -7.29880334122076 | 8.32665241819662  | h |

|                    |                   |                   |   |
|--------------------|-------------------|-------------------|---|
| 1.27757181797097   | -5.17986784387721 | 8.63183912671240  | h |
| 1.80896959791219   | -8.51116157253331 | 8.45637011244135  | h |
| -14.40553717258803 | 14.57873531927898 | 21.74989482205925 | h |
| -13.80941735557263 | 13.69884745215361 | 24.93853177539510 | h |
| -16.57977471993032 | 8.08919480572227  | 22.33995248524867 | h |
| -16.82830602643496 | 10.30398045910354 | 24.85998198681390 | h |
| -17.68442913790470 | 11.20923212023493 | 21.72931809530978 | h |
| -8.40576809543011  | 7.81472265129500  | 23.22977696307003 | h |
| -11.13513720190368 | 8.15878839746919  | 22.34079983563300 | h |
| -9.80948149640615  | -3.80422321149903 | 12.02204554902771 | h |
| -7.18864364245049  | -4.59806667533031 | 13.27500259337112 | h |
| -13.61281851393657 | -6.11372118272992 | 12.05292029963922 | h |
| -14.03842716475529 | -3.19243463347263 | 11.89138396408179 | h |
| -16.74849384029561 | 0.43229270224327  | 9.01378275554967  | h |
| -3.36174179333823  | 6.08023181368151  | 9.54214323790441  | h |
| -5.73020202360632  | 6.25774283649101  | 11.25838670565132 | h |
| -0.75274621224871  | 6.75118680094978  | 5.87084396434589  | h |
| -2.43103623320799  | 9.11634530549215  | 6.25369432468774  | h |
| 3.78102067608002   | 6.46888524670141  | 5.88449201947436  | h |
| 4.52287816534327   | 5.95917256214629  | 1.44244271943399  | h |
| 1.77794094612994   | 4.07044558598463  | 1.54978650342658  | h |
| 6.09858968896622   | 1.83401112792674  | 1.69028895874957  | h |
| 6.49380116226582   | 3.05709797694376  | 4.72814577304678  | h |
| 5.08705189264321   | -1.40254676038122 | 4.68321855419894  | h |
| 2.39370425285048   | -0.62276043137288 | 2.96229521017909  | h |
| -3.16327213253780  | -3.90507880925742 | 13.98441625169376 | o |
| -2.19381397203355  | -5.11556454799606 | 12.96364109130675 | h |
| -2.15971692185401  | -3.88373045525318 | 15.52095533179784 | h |
| 4.96708845541437   | 1.81820724649933  | 21.15084739722819 | h |
| 5.47819198950555   | 2.03268416685452  | 24.43792102780596 | h |
| 6.35481670811767   | -2.24177421302652 | 23.15099133331891 | h |
| 3.62212165914912   | -2.19351657051812 | 25.10699400895843 | h |
| 2.27092666824837   | -6.00075246663753 | 23.43768027627224 | h |
| 4.47032961332020   | -6.35938149800209 | 20.94247820975543 | h |
| 0.15891986377432   | -8.31055275615237 | 20.16030059613303 | h |
| -1.18507775227556  | -5.25008160370468 | 20.39735609297533 | h |
| 4.15548386960820   | -7.86272789427791 | 16.73931113945704 | h |
| 1.32034367481891   | -9.53165359563128 | 16.06921685707738 | h |
| 3.97276309660320   | -8.29142410385919 | 12.32990266686392 | h |

\$user-defined bonds  
\$end

[Gd-Motex.6Water]^+{+}:  
\$symmetry c1  
\$dft  
functional b3-lyp  
gridsize 5  
Energy: -3388.729922446

|         |                   |                  |                   |   |
|---------|-------------------|------------------|-------------------|---|
| \$coord | 2.01670855873192  | 0.38834446455759 | 6.76459789378845  | c |
|         | -0.67813595852547 | 0.73479541602569 | 7.00692336874138  | c |
|         | -1.27726827779216 | 1.02371948923956 | 9.47343851674791  | n |
|         | 0.90697687379375  | 0.89186665408814 | 10.84298399618219 | c |
|         | 3.00380477939764  | 0.47582633564608 | 9.19530941384889  | c |
|         | -2.49803293720286 | 0.81272965212716 | 5.05047070918445  | c |
|         | -5.07864222575526 | 1.35298871590363 | 5.15890075827681  | c |
|         | -6.46808138199373 | 2.02606624628227 | 7.25227544875828  | n |
|         | -8.88645236383187 | 2.51505581416787 | 6.42383623776615  | c |
|         | -9.04613063645533 | 2.08283150070918 | 3.69839276581115  | c |

|                    |                   |                   |    |
|--------------------|-------------------|-------------------|----|
| -6.69689925669523  | 1.36914240729667  | 2.91710001044665  | c  |
| -10.93636985842405 | 3.34944228747732  | 7.85210030628350  | c  |
| -11.10131540288079 | 3.94446688545434  | 10.45602836407769 | c  |
| -9.11121873479298  | 3.78799693764279  | 12.05385575001020 | n  |
| -9.90195081908605  | 4.52387336262851  | 14.39983819793961 | c  |
| -12.51498307136150 | 5.18888089263043  | 14.32167618653475 | c  |
| -13.29709745905585 | 4.79031227461351  | 11.83647042581387 | c  |
| -8.18136664946144  | 4.42504041622404  | 16.47176766803906 | c  |
| -5.89258236717530  | 3.54662636532051  | 16.09067461929600 | n  |
| -5.06604113540550  | 1.88998821589922  | 11.72260335956453 | gd |
| -6.44186053283356  | -2.26491266170113 | 12.66772294395622 | o  |
| -15.93151652809766 | 5.05775231608558  | 10.81025350668920 | c  |
| -17.7719999821402  | 2.90960382680777  | 11.55209065783485 | c  |
| -16.83446765853929 | 0.24117116629633  | 10.99746953784448 | c  |
| -14.96109703220557 | -0.60379360214620 | 12.77847003110943 | o  |
| -14.09034969327336 | 6.09876775874674  | 16.48856104753536 | c  |
| -5.87923641982274  | 0.67082888031082  | 0.29508131995498  | c  |
| -5.78491798162713  | -2.19344619931490 | -0.18622917479015 | c  |
| -11.38572261491542 | 2.35693726712016  | 2.12337957109388  | c  |
| -13.12312885621168 | 0.02858298154898  | 2.18344123299275  | c  |
| 0.81505758098808   | 1.26560162842172  | 13.49914406381801 | c  |
| -1.35111842967880  | 1.73586721462893  | 14.60708953835556 | n  |
| -1.67400736311690  | 2.25289118642562  | 17.16527142347976 | c  |
| -4.04723202680570  | 3.24283044129829  | 17.94713859560067 | c  |
| -4.40457355866336  | 3.83683889201918  | 20.51327113898945 | c  |
| -2.53000224062232  | 3.42566147249279  | 22.28377152028548 | c  |
| -0.17366621512386  | 2.37980495090104  | 21.50364337437605 | c  |
| 0.20326803683047   | 1.81444476936042  | 18.98777805996595 | c  |
| 1.52269123667303   | 2.00735163315326  | 23.38704609146924 | o  |
| 4.01497712980732   | 1.11978797396187  | 22.88596861794490 | c  |
| 4.26078854403107   | -1.70857515932346 | 23.25325257309466 | c  |
| 2.84750212899934   | -2.99448697794745 | 21.38511881719670 | o  |
| 2.77738442182838   | -5.64671067151092 | 21.70263008166351 | c  |
| 0.69034104162724   | -6.74327075137042 | 20.07149505500476 | c  |
| 1.07363982423740   | -6.44399810712029 | 17.42146034902339 | o  |
| 2.67465114884469   | -8.29925617382833 | 16.31201098327893 | c  |
| 2.95690310625863   | -7.84246063869046 | 13.50695117828941 | c  |
| 0.71912760946501   | -8.53352677930853 | 12.19162362323397 | o  |
| 0.99599776320534   | -8.39043595129640 | 9.52253947716543  | c  |
| -2.69115293669599  | 3.93420963713337  | 24.78430511435760 | o  |
| -5.04509703217083  | 4.33644307046354  | 26.04579344439307 | c  |
| -5.15575572043918  | 6.96102210252868  | 27.16840693661749 | c  |
| -5.64305342531854  | 8.76450591178147  | 25.24281699366932 | o  |
| -5.40254598645720  | 11.31379756963100 | 26.06599054598292 | c  |
| -6.62044723386796  | 13.03963782457500 | 24.14843846279351 | c  |
| -9.27152621268206  | 12.72043846191084 | 24.29199472440450 | o  |
| -10.64277451995105 | 14.02591539704486 | 22.40458134353002 | c  |
| -13.42888528478900 | 13.53090815179660 | 22.76881528286601 | c  |
| -13.99639356851470 | 10.97813859594216 | 22.16492366242786 | o  |
| -16.55153054672931 | 10.33120541195897 | 22.65039884992635 | c  |
| 5.71986152887758   | 0.23720605642133  | 9.95626965256474  | c  |
| 3.46933898004830   | 0.06584793806855  | 4.35188657320267  | c  |
| 4.99383552257082   | 2.37929304376269  | 3.43957296622867  | c  |
| 3.47732955674755   | 4.72959485389899  | 2.74850337987243  | c  |
| 2.47210683576107   | 6.06061506654578  | 4.88626351261570  | o  |
| -3.62536996475984  | 6.30881028473673  | 11.06070505960068 | o  |
| -11.16731623902902 | -4.15563268283409 | 12.16880385630080 | o  |
| -2.45563543120206  | 7.43071337247705  | 6.28740493083296  | o  |
| -9.91496002972956  | 7.19894713241546  | 22.10422238930949 | o  |
| -1.78616957759762  | 0.42304583300810  | 3.17476822996322  | h  |

|                    |                   |                   |   |
|--------------------|-------------------|-------------------|---|
| 2.58307838937218   | 1.22881046333546  | 14.55086691930621 | h |
| 1.92447482120680   | 0.88480820874316  | 18.42291686889618 | h |
| -6.17598636649792  | 4.66262123365272  | 21.09618743833949 | h |
| -8.82916018066522  | 5.07067247719940  | 18.31583437529115 | h |
| -12.66217677034402 | 3.61146680971656  | 6.79062459949751  | h |
| -10.84708557891804 | 2.73596679568761  | 0.16716091402713  | h |
| -12.45201146266618 | 4.01628698159603  | 2.73920937074426  | h |
| -14.80514535970339 | 0.34684336956773  | 1.03158384013228  | h |
| -12.15411760919846 | -1.63724625721149 | 1.45003305804004  | h |
| -13.73261047249902 | -0.40629467040595 | 4.10530761354407  | h |
| -4.01852662970728  | 1.48134026957316  | -0.09989688984121 | h |
| -7.16413439651654  | 1.53536455713432  | -1.06915692689081 | h |
| -5.16810949305149  | -2.58612299954616 | -2.11575941866555 | h |
| -4.48111882162022  | -3.13094534458798 | 1.10809822546952  | h |
| -7.64289825585864  | -3.04853348192762 | 0.07538318775156  | h |
| 6.67942469542622   | 2.06969000789078  | 9.99845922254143  | h |
| 5.91823393068363   | -0.58832060775397 | 11.83592557700855 | h |
| 6.76597582873925   | -0.96047756207216 | 8.64146657857588  | h |
| -5.11285672892853  | 2.96257379147599  | 27.58736462595877 | h |
| -6.65828533060210  | 3.99870279484784  | 24.81165596643686 | h |
| -3.35555738355238  | 7.37816708687369  | 28.10661008436874 | h |
| -6.66158697685892  | 7.02216501632562  | 28.59615827917695 | h |
| -15.85892497773894 | 5.17713998977667  | 8.75059656291151  | h |
| -16.75140720144786 | 6.84603938827482  | 11.44792356980694 | h |
| -19.54564491193315 | 3.19663590610063  | 10.52903479265333 | h |
| -18.23143473994969 | 3.02749416128357  | 13.56371115980953 | h |
| -18.38802499132066 | -1.10489114001992 | 11.14567959533909 | h |
| -13.89037868383213 | 0.82883891869207  | 13.16792049857668 | h |
| -12.94785577604853 | 7.07890196050144  | 17.89279129553481 | h |
| -15.55624816222644 | 7.39929017144075  | 15.84213296235119 | h |
| -15.04144100082856 | 4.53626154376921  | 17.45425419222346 | h |
| -6.33712972633224  | 11.56612879173375 | 27.89845333558841 | h |
| -3.39816368729741  | 11.79859608275422 | 26.28001586081020 | h |
| -6.09636810594312  | 15.00554207011427 | 24.56605827096942 | h |
| -5.92788463945494  | 12.57960209005352 | 22.24677051364959 | h |
| -10.30747938725600 | 16.07135690556611 | 22.54194979852644 | h |
| -10.05091970498749 | 13.40340827380129 | 20.51515628985170 | h |
| 3.41265178625784   | -5.84990934308011 | 13.15355134774698 | h |
| -0.78549717234659  | -8.99766161940484 | 8.69184315217099  | h |
| 1.41238724891107   | -6.45561961264687 | 8.91321735892713  | h |
| 2.50748596761118   | -9.64730346152367 | 8.87320355520795  | h |
| -14.51328593623825 | 14.80419480551268 | 21.53945010688766 | h |
| -13.95181786260274 | 13.92892375496706 | 24.73582874025748 | h |
| -16.79196757614326 | 8.35381866625947  | 22.13629027653591 | h |
| -17.01697812312673 | 10.57371275154715 | 24.65387074234954 | h |
| -17.84227517676756 | 11.49110116748458 | 21.51847334441804 | h |
| -8.63864202000978  | 7.97295685187785  | 23.17201528113834 | h |
| -11.34412114979757 | 8.34418884742438  | 22.22699993580647 | h |
| -8.17097117349653  | -2.96385775722959 | 12.50421942388809 | h |
| -5.32536427960919  | -3.63325474160979 | 13.30268423317986 | h |
| -11.58714082486902 | -5.64442154531007 | 13.12607065990864 | h |
| -12.63232058574168 | -3.02166422513444 | 12.29452635764893 | h |
| -16.07174443393651 | 0.11858706737920  | 9.07503693242374  | h |
| -3.10881364519331  | 6.81020147599263  | 9.32149119194454  | h |
| -4.58780171911966  | 7.68894136661556  | 11.75277830330342 | h |
| -0.74035950676361  | 6.99788014968855  | 5.74810377087680  | h |
| -3.55421220929953  | 6.33418858819713  | 5.32950152194938  | h |
| 3.84396249533753   | 6.63942626962535  | 5.93414821081308  | h |
| 4.65280373797973   | 6.01576515361289  | 1.63242277059143  | h |
| 1.83902346257127   | 4.23611823305159  | 1.59675186269330  | h |



|                   |                    |                   |   |
|-------------------|--------------------|-------------------|---|
| 6.05465026856757  | 1.81789613397620   | 1.75361962579133  | h |
| 6.41492736303988  | 2.89416181793225   | 4.85427818980478  | h |
| 4.80529141398599  | -1.50008712331712  | 4.56775957104495  | h |
| 2.18956915534036  | -0.50732400713615  | 2.83491353537566  | h |
| -3.42906351282285 | -5.91306982630222  | 14.40980628423123 | o |
| -2.41695952719948 | -6.95979155182238  | 13.28628282606335 | h |
| -2.23976408755069 | -5.59674084858451  | 15.77016967646015 | h |
| 4.65210277116219  | 1.68861826050357   | 21.00805868684015 | h |
| 5.21827779216715  | 2.05775151420863   | 24.27500494609593 | h |
| 6.27516740639738  | -2.21445321069540  | 23.14446776625195 | h |
| 3.57695340284088  | -2.21599225713738  | 25.14560983950331 | h |
| 2.35295084887051  | -6.13007986981103  | 23.67799202643949 | h |
| 4.62359106210839  | -6.48186047364447  | 21.24692843358541 | h |
| 0.44662447044601  | -8.74898255067277  | 20.53502175444660 | h |
| -1.06992576675739 | -5.76175531044310  | 20.50796619071016 | h |
| 4.56269110845825  | -8.22027711912060  | 17.16158493650585 | h |
| 1.89785242937976  | -10.19417164492338 | 16.63652253035881 | h |
| 4.53861677643314  | -8.99653054730918  | 12.82105043596802 | h |

\$user-defined bonds  
\$end

```
[Lu-Motex.6Water]^{+}:
$symmetry c1
$dft
  functional b3-lyp
  gridsize 5
Energy: -3392.837910191
$coord
```

|                    |                   |                   |    |
|--------------------|-------------------|-------------------|----|
| 1.97305724755671   | 0.33892304182628  | 6.83424610415222  | c  |
| -0.70977645910746  | 0.76326398335140  | 7.06327322447945  | c  |
| -1.32694217438012  | 1.10494029481675  | 9.52134653797799  | n  |
| 0.85236200004778   | 0.89973841900504  | 10.89121542021318 | c  |
| 2.94679367912966   | 0.40920389120612  | 9.26747651060885  | c  |
| -2.50625030117880  | 0.82286628972571  | 5.09799142062869  | c  |
| -5.08023864687852  | 1.35156480454369  | 5.22136441402118  | c  |
| -6.45337550656356  | 2.05960272972380  | 7.31707822508994  | n  |
| -8.88620860401974  | 2.46649723370932  | 6.47920415158011  | c  |
| -9.06196541831370  | 1.96236930995195  | 3.76979865686883  | c  |
| -6.70672754293103  | 1.28056891977753  | 2.98997546354638  | c  |
| -10.94677140490448 | 3.28373431137776  | 7.88545941362047  | c  |
| -11.08609925898603 | 3.91010958034959  | 10.47251507324100 | c  |
| -9.07697119351710  | 3.78480260825176  | 12.05364354896815 | n  |
| -9.88097442723178  | 4.55377874462592  | 14.38611430417254 | c  |
| -12.49529079204021 | 5.19818218592416  | 14.31703694882918 | c  |
| -13.28341504424213 | 4.75808245305465  | 11.84460105793240 | c  |
| -8.16743269885106  | 4.48520062342420  | 16.44688031524223 | c  |
| -5.87573700216474  | 3.63372619798159  | 16.04284273701514 | n  |
| -4.98912163207934  | 2.22748968757921  | 11.68712100225403 | lu |
| -6.24549167271194  | -1.77160204542072 | 12.58662833212947 | o  |
| -15.92296948448143 | 4.98944767866969  | 10.82382928861892 | c  |
| -17.73692280845685 | 2.82665126457842  | 11.58868796473984 | c  |
| -16.76644477862911 | 0.16524185889970  | 11.05891930464286 | c  |
| -14.88158720737860 | -0.64019858046149 | 12.84613590497872 | o  |
| -14.06150869678211 | 6.12799531547957  | 16.48189959923300 | c  |
| -5.88920735690411  | 0.53530538086230  | 0.38071251023589  | c  |
| -5.73712227395363  | -2.33658864312422 | -0.03550498456014 | c  |
| -11.42049959297115 | 2.14204173502609  | 2.20946956985383  | c  |
| -13.09612102386508 | -0.22891269286128 | 2.33027928396493  | c  |

|                    |                   |                   |   |
|--------------------|-------------------|-------------------|---|
| 0.74808332490571   | 1.25411217872623  | 13.53618996180230 | c |
| -1.42169545868664  | 1.79522581589484  | 14.59867069661531 | n |
| -1.72706386919021  | 2.26866697752485  | 17.16300979988010 | c |
| -4.07518446825496  | 3.29785463916121  | 17.93073883148032 | c |
| -4.45348108335924  | 3.87430407895453  | 20.49786528405876 | c |
| -2.60412562240598  | 3.40340259257448  | 22.27936045731047 | c |
| -0.26495837877152  | 2.30844636582722  | 21.51047158358789 | c |
| 0.12526779441908   | 1.75834281559889  | 18.99331618349381 | c |
| 1.40207441842298   | 1.87607124642590  | 23.40740301542638 | o |
| 3.89812540951236   | 0.99248094838508  | 22.91833110131347 | c |
| 4.13976048646962   | -1.84126039319236 | 23.24260979025923 | c |
| 2.75375969733470   | -3.09569379550409 | 21.33357730731808 | o |
| 2.70230353557253   | -5.75546472284587 | 21.58720287149142 | c |
| 0.63591980741244   | -6.82248176733030 | 19.91165616340433 | c |
| 1.04717386686336   | -6.44626285102316 | 17.27576224899840 | o |
| 2.60395186994141   | -8.30606618783424 | 16.11304567616846 | c |
| 2.93157516225541   | -7.74937590699238 | 13.33103583672439 | c |
| 0.68204324276407   | -8.29992176609180 | 11.97114329202053 | o |
| 0.98352041854175   | -8.04177170751987 | 9.31313134645804  | c |
| -2.77469091982493  | 3.89170020917991  | 24.78323304959226 | o |
| -5.12714292883233  | 4.35874217251753  | 26.02439651063765 | c |
| -5.18809384421703  | 6.99279925523063  | 27.12888954816238 | c |
| -5.63292806985440  | 8.79451834887849  | 25.19062152229305 | o |
| -5.34085855653043  | 11.34366684778622 | 25.99840424589980 | c |
| -6.58023407959164  | 13.08048947287661 | 24.10427547770839 | c |
| -9.23072380214695  | 12.79255657730257 | 24.30873276497709 | o |
| -10.63198120611239 | 14.11190549593313 | 22.45314441160927 | c |
| -13.41262922639205 | 13.62816550095699 | 22.87152953761459 | c |
| -14.00395503308604 | 11.08126630855232 | 22.26607192738985 | o |
| -16.54790567700904 | 10.43859211721872 | 22.81252767908780 | c |
| 5.64738638003525   | 0.09458611122040  | 10.05450822445193 | c |
| 3.42707229380491   | -0.02961047338027 | 4.42934369042256  | c |
| 4.99334129945590   | 2.25262629336332  | 3.50784346192226  | c |
| 3.51940993188383   | 4.62557045074630  | 2.80150995512352  | c |
| 2.55149403232151   | 5.99802516828974  | 4.93195571553856  | o |
| -3.64560857374488  | 6.42481170658722  | 10.97968676976620 | o |
| -10.86449656108540 | -3.89579958480501 | 12.04297920382181 | o |
| -2.36870674108876  | 7.40555428199270  | 6.25635931144956  | o |
| -9.93685209787479  | 7.29796531603206  | 22.07088123668819 | o |
| -1.79817357728448  | 0.39365201748748  | 3.23033774284602  | h |
| 2.48968279504003   | 1.13463024808385  | 14.62171153574889 | h |
| 1.82908232989630   | 0.79069076184856  | 18.44067918155906 | h |
| -6.21061566876048  | 4.73294335672506  | 21.07464677376503 | h |
| -8.81445636159605  | 5.10872213682149  | 18.29709230329435 | h |
| -12.68361482034691 | 3.49364494441678  | 6.83212310607469  | h |
| -10.90554292848252 | 2.49334025440494  | 0.24161889672850  | h |
| -12.52575260719907 | 3.78572152891321  | 2.79762851269716  | h |
| -14.79492131929359 | 0.02283271651592  | 1.18656737109045  | h |
| -12.09034349974501 | -1.88328865100749 | 1.62104469811443  | h |
| -13.67848972443962 | -0.64210319694566 | 4.26521937615728  | h |
| -4.04939965629080  | 1.37661986935600  | -0.04682027821593 | h |
| -7.20147092364294  | 1.33981043278215  | -0.99425563527117 | h |
| -5.12905768588225  | -2.76071653463653 | -1.96121211134960 | h |
| -4.40259345127135  | -3.21623628843783 | 1.26804287885634  | h |
| -7.57400533279455  | -3.22446974856080 | 0.26283432042142  | h |
| 6.65315822797124   | 1.90144616164566  | 10.11765040982832 | h |
| 5.80537993087397   | -0.74619273458874 | 11.93141188717348 | h |
| 6.67562981747235   | -1.12194236341432 | 8.74300976387687  | h |
| -5.23537711649048  | 2.99805735510585  | 27.57502095992097 | h |
| -6.73923606331619  | 4.04643582823018  | 24.78193216918133 | h |

|                    |                    |                   |   |
|--------------------|--------------------|-------------------|---|
| -3.38303964476291  | 7.37907355712845   | 28.07075451618421 | h |
| -6.69741244244606  | 7.09387320536242   | 28.55061628352192 | h |
| -15.86027654748507 | 5.09500199289663   | 8.76324785434406  | h |
| -16.75923315090265 | 6.77326485195727   | 11.45264759772776 | h |
| -19.51485012956046 | 3.08246102032186   | 10.56495705662168 | h |
| -18.19610685174986 | 2.95837146242563   | 13.59962273193639 | h |
| -18.30321387583558 | -1.19862586358606  | 11.21872234548369 | h |
| -13.85458613590065 | 0.81859439508002   | 13.25534694442220 | h |
| -12.90597764954327 | 7.07163020836450   | 17.90015067961714 | h |
| -15.49494988255454 | 7.46491631827966   | 15.83594401005603 | h |
| -15.05342801759838 | 4.58043765882342   | 17.43015506759882 | h |
| -6.23116834190166  | 11.61418702897211  | 27.84989203376373 | h |
| -3.32610702300856  | 11.80260782030526  | 26.16646824275836 | h |
| -6.02271692406711  | 15.04043583508204  | 24.50645892207928 | h |
| -5.93718647332239  | 12.60957492264379  | 22.18789119325456 | h |
| -10.28393341003617 | 16.15520198061517  | 22.59094430441855 | h |
| -10.08094678757959 | 13.49297115333099  | 20.55023511702399 | h |
| 3.46621298725696   | -5.76313699800773  | 13.06279896746215 | h |
| -0.80998079864592  | -8.55305652213183  | 8.44452346996975  | h |
| 1.46289434609612   | -6.09425365974280  | 8.79804056335044  | h |
| 2.45966788635130   | -9.31430135344133  | 8.61452726901243  | h |
| -14.51671008544581 | 14.91320437825887  | 21.67232480336894 | h |
| -13.89260762403361 | 14.01790316230434  | 24.85106651662360 | h |
| -16.80677172935755 | 8.46453588729401   | 22.29450524036469 | h |
| -16.96153477606840 | 10.67185355996989  | 24.82843599103910 | h |
| -17.86388014993241 | 11.60770028282816  | 21.71990785854472 | h |
| -8.64537919224115  | 8.05178426336309   | 23.13500971551609 | h |
| -11.36209751679739 | 8.44379126232905   | 22.23046846026686 | h |
| -7.95973349821925  | -2.49648174796174  | 12.38325240216900 | h |
| -5.12127815863696  | -3.14853510494188  | 13.18952575822258 | h |
| -11.13896651014869 | -5.42937216070128  | 12.98242710895880 | h |
| -12.40619905191606 | -2.87999439711930  | 12.23845156215726 | h |
| -16.00225225607827 | 0.03505270314867   | 9.13760128381717  | h |
| -3.08116212393407  | 6.88813757226677   | 9.23479005965182  | h |
| -4.56685280733487  | 7.84098609019739   | 11.65485157907137 | h |
| -0.63972797438646  | 6.96841966410584   | 5.75998905504794  | h |
| -3.44345865297019  | 6.28952088816370   | 5.29263701400477  | h |
| 3.94042768802840   | 6.57197336882156   | 5.95975601385986  | h |
| 4.71331943018012   | 5.87842929292040   | 1.66766946351776  | h |
| 1.86559207165079   | 4.15348608993117   | 1.66330257760210  | h |
| 6.04753865074503   | 1.66498761859793   | 1.82670096668911  | h |
| 6.42039106107770   | 2.74996705894698   | 4.92286640596777  | h |
| 4.73638421044660   | -1.61554767381046  | 4.66054745479302  | h |
| 2.14384640502996   | -0.59162796466667  | 2.91132191397895  | h |
| -3.37396087184686  | -5.56310157228672  | 14.23846857069474 | o |
| -2.39476696439310  | -6.61074778818758  | 13.08750215612899 | h |
| -2.19272641397711  | -5.35750828142675  | 15.62633500563773 | h |
| 4.55342174161721   | 1.58952630801754   | 21.05536416803103 | h |
| 5.08898225972977   | 1.90679441367273   | 24.33375971741075 | h |
| 6.15597164537120   | -2.34376390349199  | 23.15275992309645 | h |
| 3.43054630749118   | -2.38092132740896  | 25.11665256671084 | h |
| 2.26803713131018   | -6.28997340939031  | 23.54713287615794 | h |
| 4.55756523259272   | -6.56548986340901  | 21.12224211046600 | h |
| 0.39926629610806   | -8.84106447535167  | 20.31793501788614 | h |
| -1.13449356196235  | -5.86384414722897  | 20.35877476369347 | h |
| 4.48392396458616   | -8.31826408998719  | 16.98473375379021 | h |
| 1.76552376151635   | -10.18685002661774 | 16.35606825016108 | h |
| 4.47557308362140   | -8.93454323636648  | 12.61253074892660 | h |

\$user-defined bonds

\$end

## II.b Explicit Hydration of Lanthanide Motexafin Complexes (Ln=La, Gd, Lu)

Table S3. Calculated change in the Gibbs energy contribution  $\Delta G_g^{\text{elec}}$  and  $\Delta G_g^{\text{vib+rot+trans}}$  (kJ/mol) , in the reaction  $[\text{Ln-Motex}(\text{H}_2\text{O})_{n-1}]^{2+} + \text{H}_2\text{O} \rightarrow [\text{Ln-Motex}(\text{H}_2\text{O})_n]^{2+}$  (Ln=La, Gd, Lu; n=6,7)<sup>a</sup>

|                                                          |           | $\Delta G_g^{\text{elec}}$ | $\Delta G_g^{\text{vib+rot+trans}}$ | $\Delta G_g$ |
|----------------------------------------------------------|-----------|----------------------------|-------------------------------------|--------------|
| [La-Motex(H <sub>2</sub> O) <sub>6</sub> ] <sup>2+</sup> | DFT/B86   | -97.61                     | 42.87                               | -54.74       |
|                                                          | DFT/B3LYP | -97.92                     | 46.97                               | -50.95       |
| [Gd-Motex(H <sub>2</sub> O) <sub>6</sub> ] <sup>2+</sup> | DFT/B86   | -94.47                     | 65.38                               | -29.09       |
|                                                          | DFT/B3LYP | -97.27                     | 70.54                               | -26.73       |
| [Lu-Motex(H <sub>2</sub> O) <sub>6</sub> ] <sup>2+</sup> | DFT/B86   | -97.92                     | 69.74                               | -28.18       |
|                                                          | DFT/B3LYP | -90.47                     | 70.91                               | -19.56       |
| [La-Motex(H <sub>2</sub> O) <sub>7</sub> ] <sup>2+</sup> | DFT/B86   | -34.86                     | 53.74                               | 18.88        |
|                                                          | DFT/B3LYP | -36.43                     | 51.47                               | 15.04        |
| [Gd-Motex(H <sub>2</sub> O) <sub>7</sub> ] <sup>2+</sup> | DFT/B86   | -42.71                     | 50.86                               | 8.15         |
|                                                          | DFT/B3LYP | -43.61                     | 47.09                               | 3.48         |
| [Lu-Motex(H <sub>2</sub> O) <sub>7</sub> ] <sup>2+</sup> | DFT/B86   | -40.10                     | 47.11                               | 7.01         |
|                                                          | DFT/B3LYP | -43.31                     | 47.65                               | 4.34         |

<sup>a</sup> basis sets B used, i.e., 46-, 53-, 60-core-electron PPs are selected for La, Gd, Lu respectively. (8s7p6d3f2g)/[6s5p5d3f2g] basis sets are used for lanthanides. For the lighter elements def2-TZVP basis sets were applied, i.e., H (5s1p)/[3s1p] and C, O, N (11s6p2d1f)/[5s3p2d1f].

## II.c Reduction Potentials of Lanthanide Motexafin Complexes (Ln=La, Gd, Lu)

Table S4. Calculated absolute reduction potentials for  $[\text{Ln-Motex}(\text{H}_2\text{O})_n]^{2+/+}$  ( $n=6, 7$ ; Ln=La, Gd, Lu) in the aqueous phase,  $\Delta G_{\text{EA}}^0(\text{aq})$  (kJ/mol), and its components  $\Delta G_{\text{EA}}^0(\text{g})$  (kJ/mol),  $\Delta G_{\text{s}}$ , and  $\Delta G'_{\text{s}}$  (kJ/mol)<sup>a</sup>

|     |    |       | $\Delta G_{\text{EA}}^0(\text{g})$ |         | $\Delta G_{\text{s}}$ | $\Delta G'_{\text{s}}$ |         | $\Delta G_{\text{EA}}^0(\text{aq})$ |         |
|-----|----|-------|------------------------------------|---------|-----------------------|------------------------|---------|-------------------------------------|---------|
|     |    |       | I                                  | II      |                       | I                      | II      | I                                   | II      |
| n=0 | La | BP86  | -728.27                            | -738.48 | -660.41               | -336.43                | -339.42 | -404.29                             | -417.49 |
|     |    | B3LYP | -728.05                            | -744.33 | -688.88               | -348.52                | -352.03 | -387.69                             | -407.48 |
|     | Gd | BP86  | -729.23                            | -738.84 | -674.28               | -347.20                | -350.73 | -402.16                             | -415.29 |
|     |    | B3LYP | -730.13                            | -744.02 | -700.54               | -356.80                | -362.35 | -386.38                             | -405.83 |
|     | Lu | BP86  | -730.22                            | -737.75 | -680.80               | -351.08                | -355.15 | -400.49                             | -412.09 |
|     |    | B3LYP | -730.92                            | -746.47 | -706.85               | -360.91                | -365.96 | -384.98                             | -405.58 |
| n=6 | La | BP86  | -632.97                            | -659.00 | -464.09               | -209.77                | -207.09 | -378.65                             | -402.00 |
|     |    | B3LYP | -620.82                            | -650.94 | -467.10               | -210.95                | -211.68 | -364.67                             | -395.52 |
|     | Gd | BP86  | -634.73                            | -664.23 | -460.85               | -212.58                | -206.83 | -386.46                             | -410.21 |
|     |    | B3LYP | -626.79                            | -654.83 | -462.85               | -211.15                | -207.81 | -375.09                             | -399.80 |
|     | Lu | BP86  | -632.03                            | -659.81 | -462.28               | -213.55                | -207.12 | -383.30                             | -404.65 |
|     |    | B3LYP | -623.80                            | -650.66 | -465.90               | -212.86                | -208.79 | -370.76                             | -393.55 |
| n=7 | La | BP86  | -629.23                            | -658.19 | -466.35               | -211.95                | -208.81 | -374.83                             | -400.65 |
|     |    | B3LYP | -615.60                            | -648.57 | -470.30               | -215.90                | -213.13 | -361.20                             | -391.40 |
|     | Gd | BP86  | -633.74                            | -664.83 | -469.52               | -220.69                | -211.83 | -384.91                             | -407.14 |
|     |    | B3LYP | -623.82                            | -652.43 | -470.24               | -219.20                | -214.40 | -372.78                             | -396.59 |
|     | Lu | BP86  | -630.71                            | -661.81 | -472.88               | -223.86                | -213.88 | -381.69                             | -402.81 |
|     |    | B3LYP | -620.09                            | -650.96 | -473.10               | -221.94                | -215.55 | -368.93                             | -393.41 |

<sup>a</sup> basis sets B used, cf. Table S3;

I: geometry of the  $[\text{Ln-Motex}(\text{H}_2\text{O})_n]^{2+}$  is used to calculate the energy of  $[\text{Ln-Motex}(\text{H}_2\text{O})_n]^+$ ; II: optimized geometry of  $[\text{Ln-Motex}(\text{H}_2\text{O})_n]^+$  is used;  $\Delta G_{\text{EA}}^0(\text{aq}) = \Delta G_{\text{EA}}^0(\text{g}) + \Delta G_{\text{s}} + \Delta G'_{\text{s}}$ , where  $\Delta G_{\text{EA}}^0(\text{g})$  is the calculated EA in gas phase;  $\Delta G_{\text{s}}$  and  $\Delta G'_{\text{s}}$  are the solvation Gibbs energies of the  $[\text{Ln-Motex}(\text{H}_2\text{O})_n]^{2+}$  and  $[\text{Ln-Motex}(\text{H}_2\text{O})_n]^+$ , respectively.

## II.d TD-DFT/BP86 and B3LYP UV-Vis Absorption Spectra of Lutetium Motexafin $[\text{Lu-Motex}]^{2+}$ in Comparison to Experimental Data

The absorption bands of the  $[\text{Ln-Motex}]^{2+}$  complexes are denoted as Q ( $\approx 600$ - $800$  nm), B ( $\approx 450$ - $600$  nm), N ( $\approx 400$ - $450$  nm), L ( $\approx 300$ - $400$  nm) and M ( $\approx 200$ - $300$ ) nm.

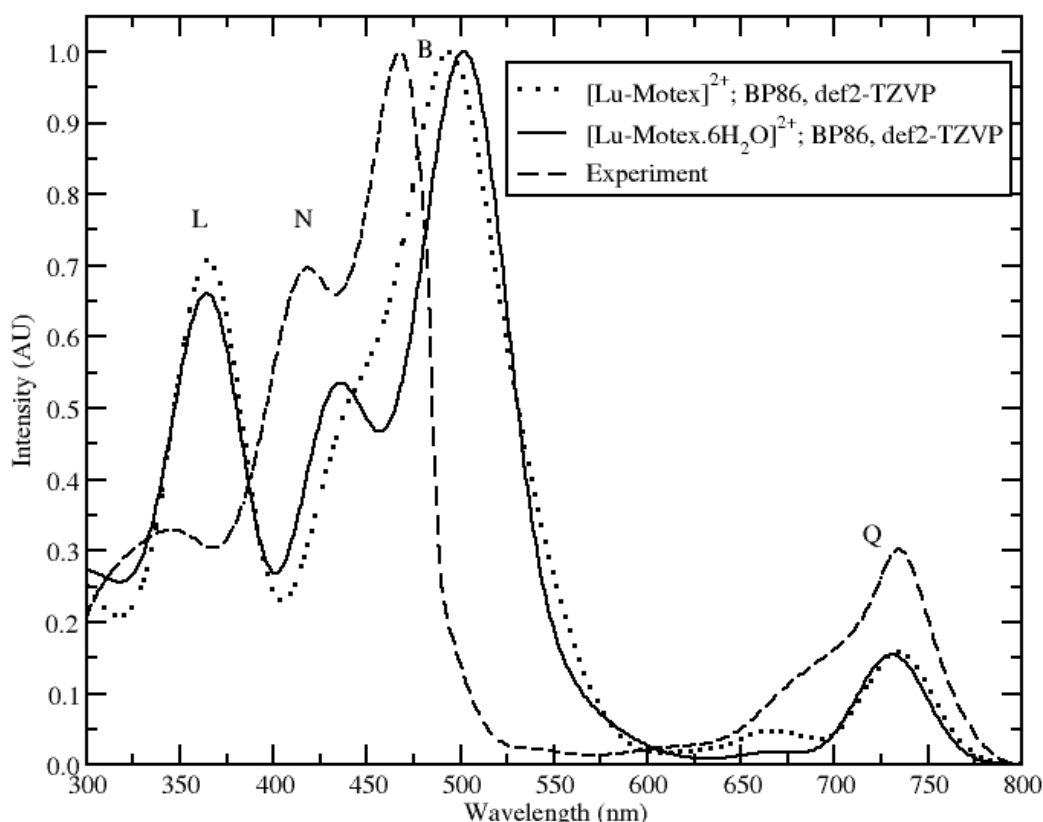

**Fig. S8a:**

**Calculated TD-DFT/BP86 and experimental UV-Vis absorption spectra for  $[\text{Lu-Motex}]^{2+}$ .**

The theoretical spectra were evaluated by time-dependent density functional theory (TD-DFT) for the  $[\text{Lu-Motex}]^{2+}$  complexes in aqueous solution modeled by COSMO. For  $[\text{Lu-Motex}.6\text{H}_2\text{O}]^{2+}$  the most strongly bound six water molecules have been taken into account explicitly. The location of the Q-band in the “therapeutic window” is accurately reproduced, and the two-peak structure of the Soret-band (B-band) is obtained when strongly bound water molecules are treated explicitly, although the position of the Soret-band is slightly red shifted compared to experiment.

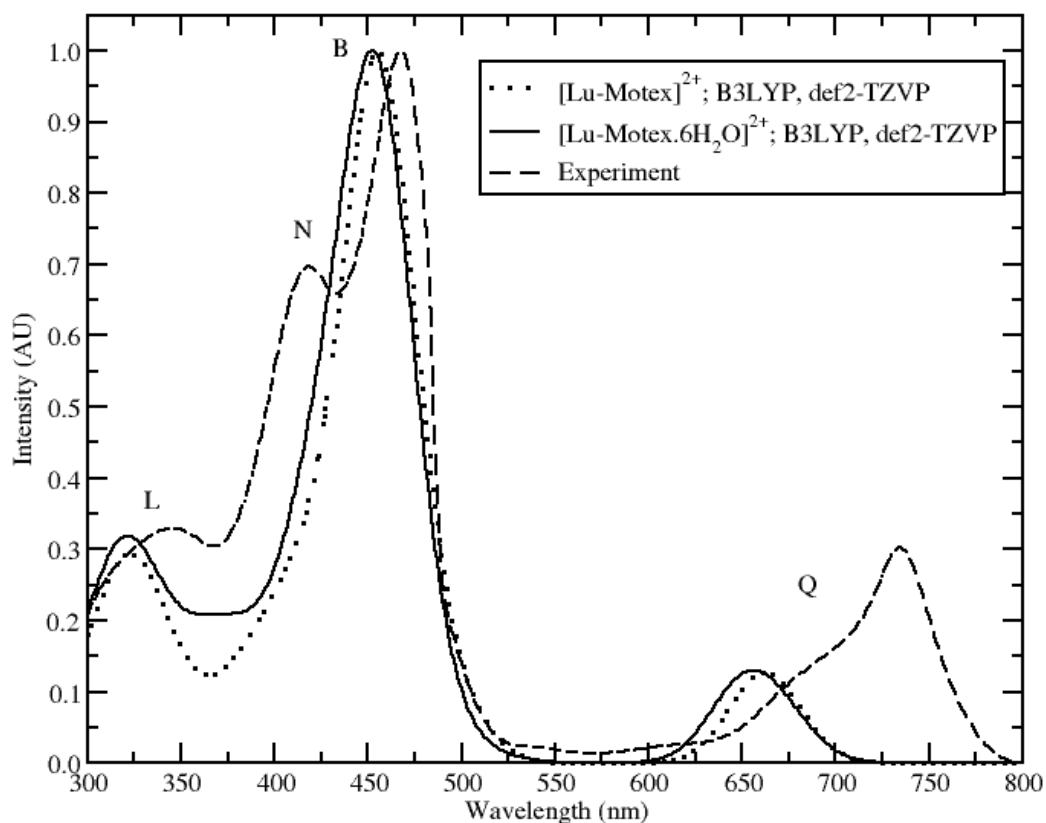

**Fig. S8b:**

**Calculated B3LYP and experimental absorption spectra for  $[\text{Lu-Motex}]^{2+}$ .**

The theoretical spectra were evaluated by time-dependent density functional theory (TD-DFT) for the  $[\text{Lu-Motex}]^{2+}$  complexes in aqueous solution modeled by COSMO. For  $[\text{Lu-Motex.6H}_2\text{O}]^{2+}$  the most strongly bound six water molecules have been taken into account explicitly. In contrast to BP86 the location of the important Q-band in the “therapeutic window” is blue shifted compared to experiment and the two-peak structure of the Soret-band (B-band) is not reproduced.

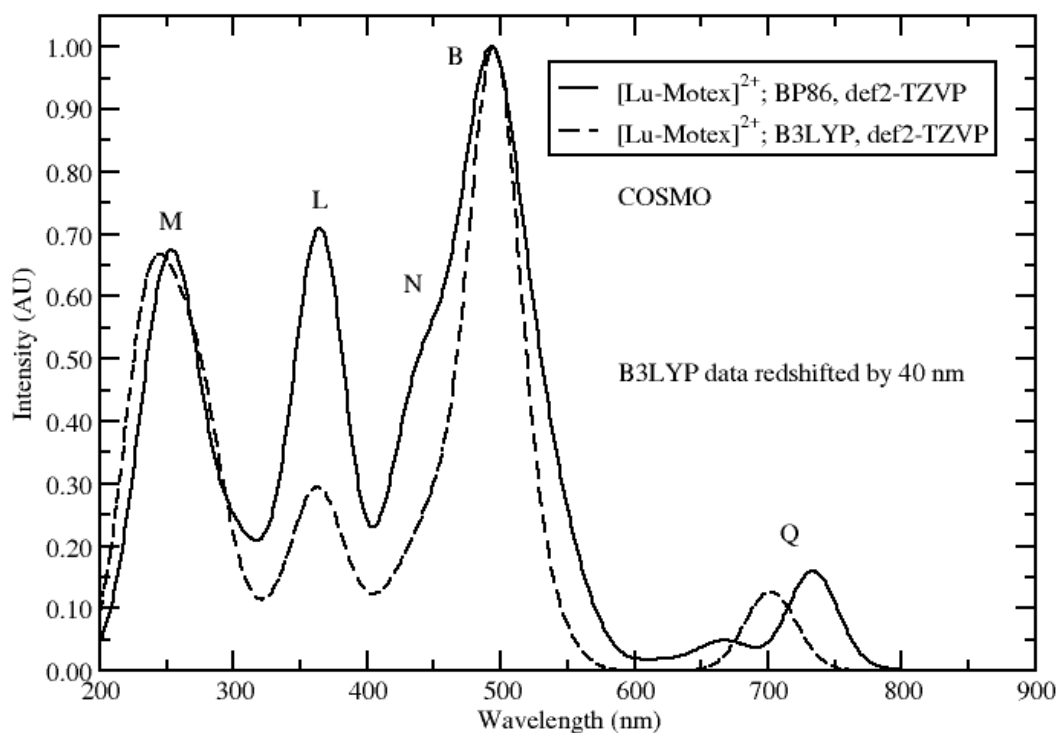

**Fig. S8c:**

**Comparison of calculated BP86 and B3LYP UV-Vis absorption spectra for [Lu-Motex]<sup>2+</sup>.**

The effects of bulk water was taken into account by COSMO. The B3LYP spectrum was shifted to larger wavelength by 40 nm for comparison.



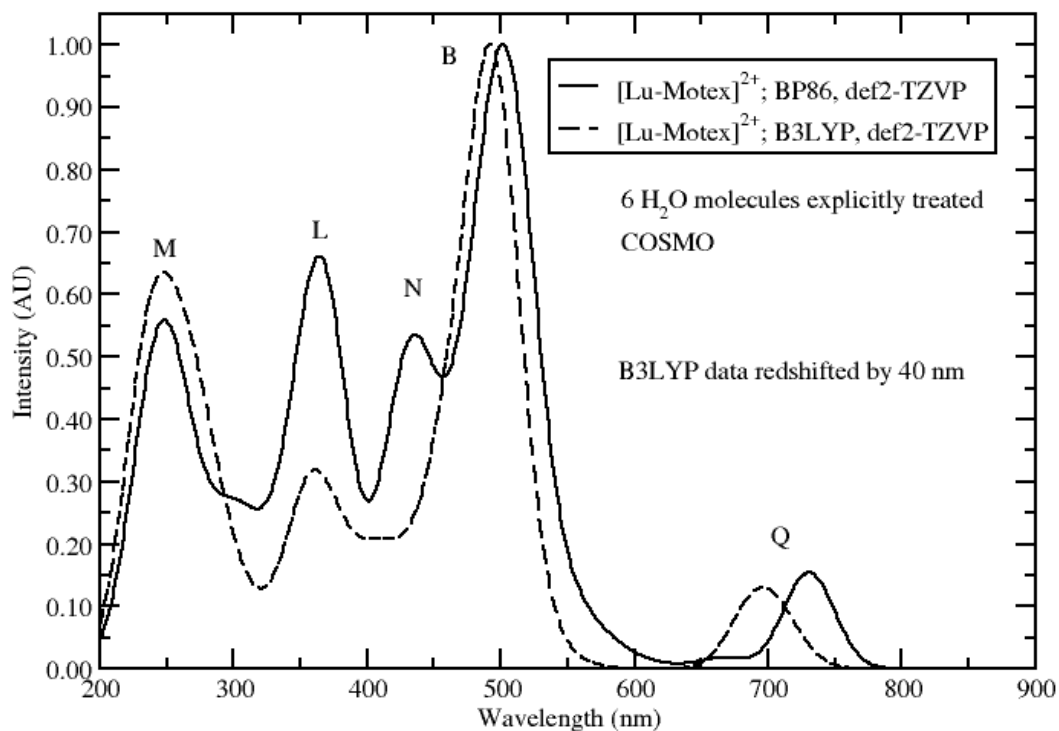

**Fig. S8d:**

**Comparison of calculated BP86 and B3LYP UV-Vis absorption spectra for  $[\text{Lu-Motex.6H}_2\text{O}]^{2+}$**

The effect of bulk water was taken into account by COSMO. The B3LYP spectrum was shifted to larger wavelength by 40 nm for comparison.

## II.c UV-Vis Absorption Spectra of Motexafin (Motex) Complexes of La, Gd and Lu from TD-DFT Calculations

Def2-TZVP basis sets and Ln large-core (4f-in-core) pseudopotentials (La: ECP46MWB; Gd: ECP53MWB; Lu: ECP60MWB) were used. Bulk water was simulated by COSMO.

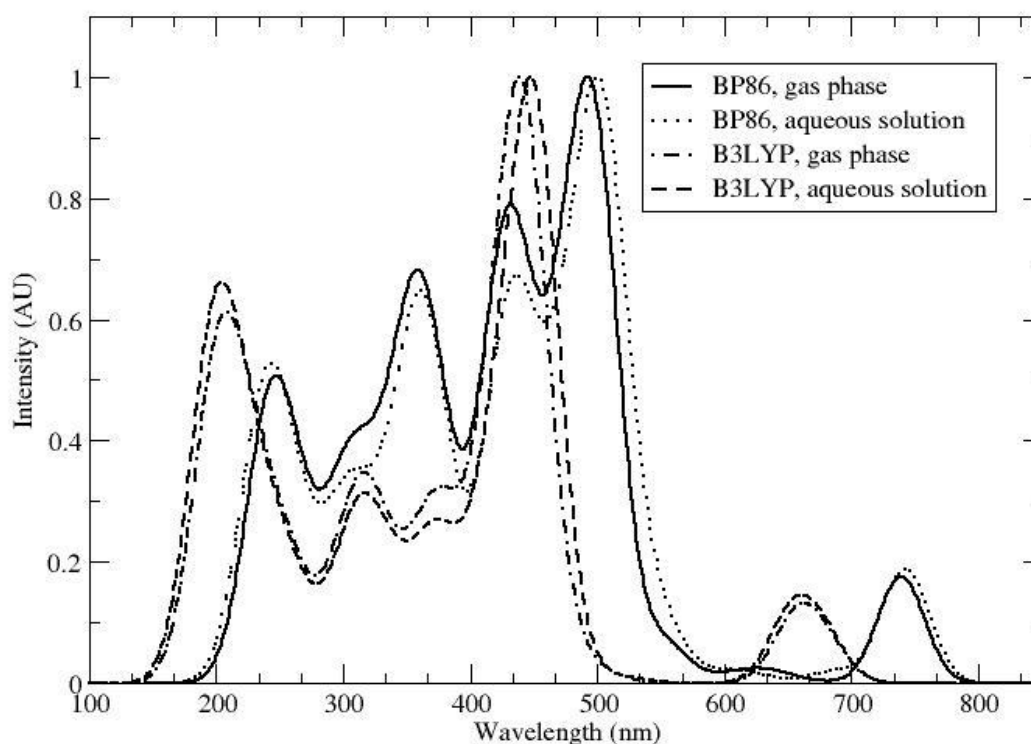

**Fig. S9a:**

**TD-DFT/BP86 and B3LYP absorption spectra for  $[\text{La-Motex.6H}_2\text{O}]^{2+}$ .**

In Figures 9a-9c the effect of bulk water was taken into account by COSMO. Relatively small changes in the positions of the band maxima and the relative intensities are observed when switching from a gas phase treatment to the one in solution.

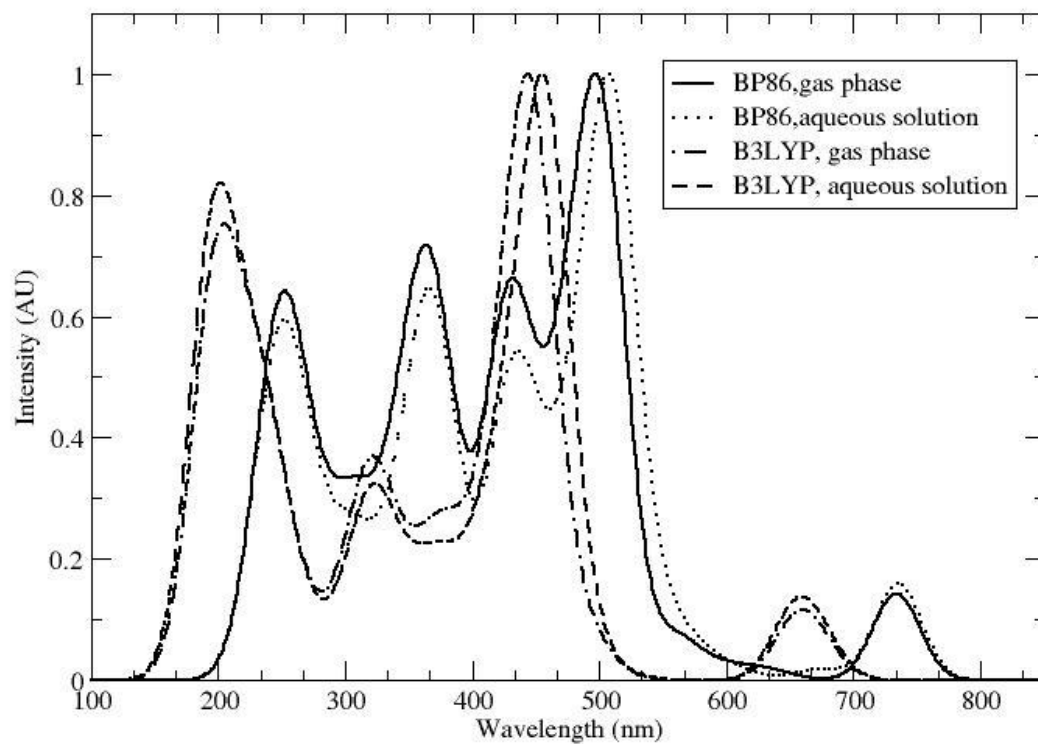

**Fig. S9b:**  
TD-DFT/BP86 and B3LYP absorption spectra for [Gd-Motex.6H<sub>2</sub>O]<sup>2+</sup>.

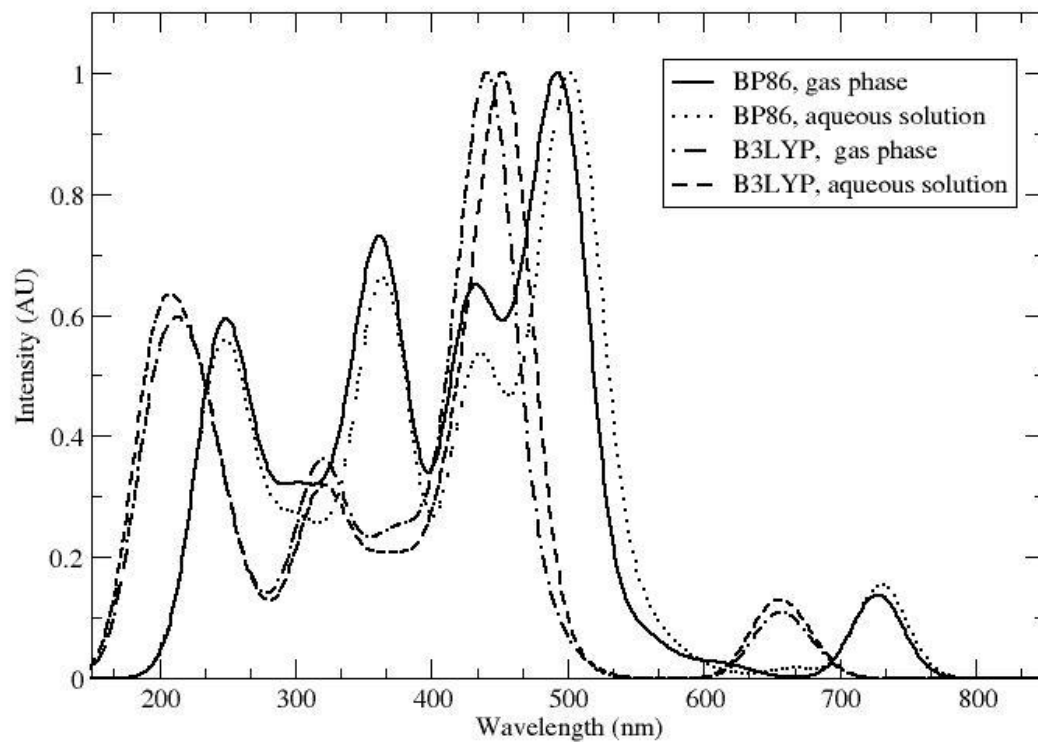

**Fig. S9c:**  
TD-DFT/BP86 and B3LYP absorption spectra for [Lu-Motex.6H<sub>2</sub>O]<sup>2+</sup>.

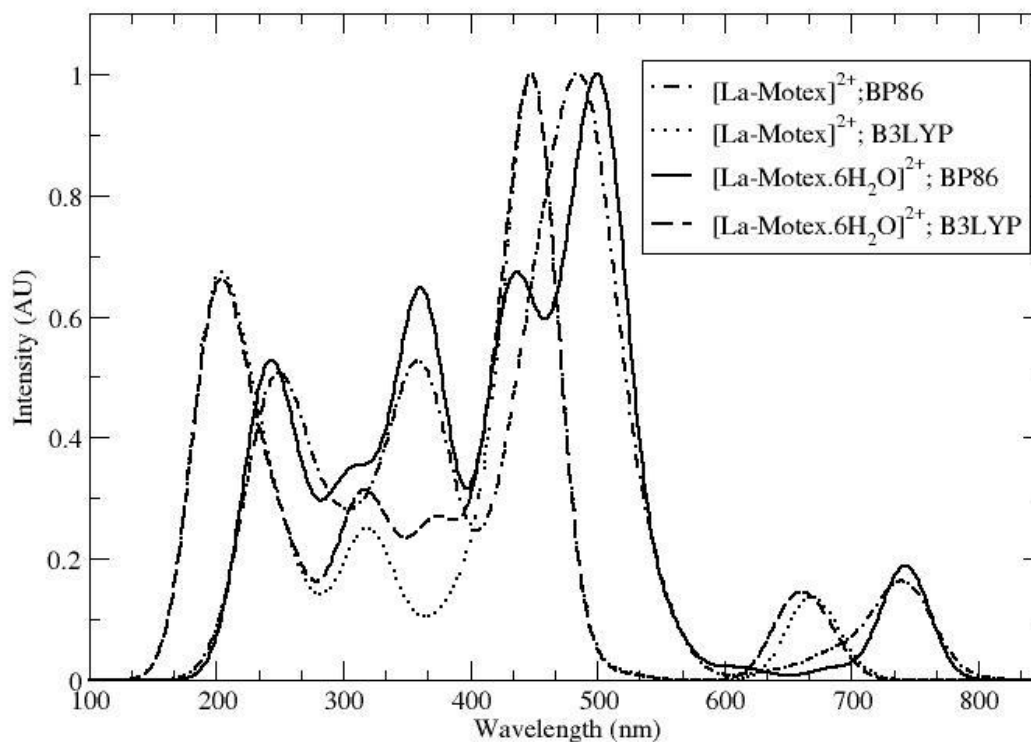

**Fig. S10a:**  
**TD-DFT/BP86 and B3LYP absorption spectra in aqueous solution for [La-Motex]<sup>2+</sup> and [La-Motex.6H<sub>2</sub>O]<sup>2+</sup>.**

In Figures 10a-10c bulk water was taken into account by COSMO. The lowest 200 singlet-singlet excitations were calculated, i.e., the drop of the intensities to zero below 200 nm is due to the limited number of excitations calculated. When taking the six most strongly bound water molecules explicitly into account, the Soret-band undergoes a slight red shift (10-15 nm) and an additional band appears near 441 nm at the BP86 level. At the B3LYP level the Soret-band maximum is not changed by explicitly treating these strongly bound water molecules, whereas slightly higher intensities arise between 300 nm and 400 nm.

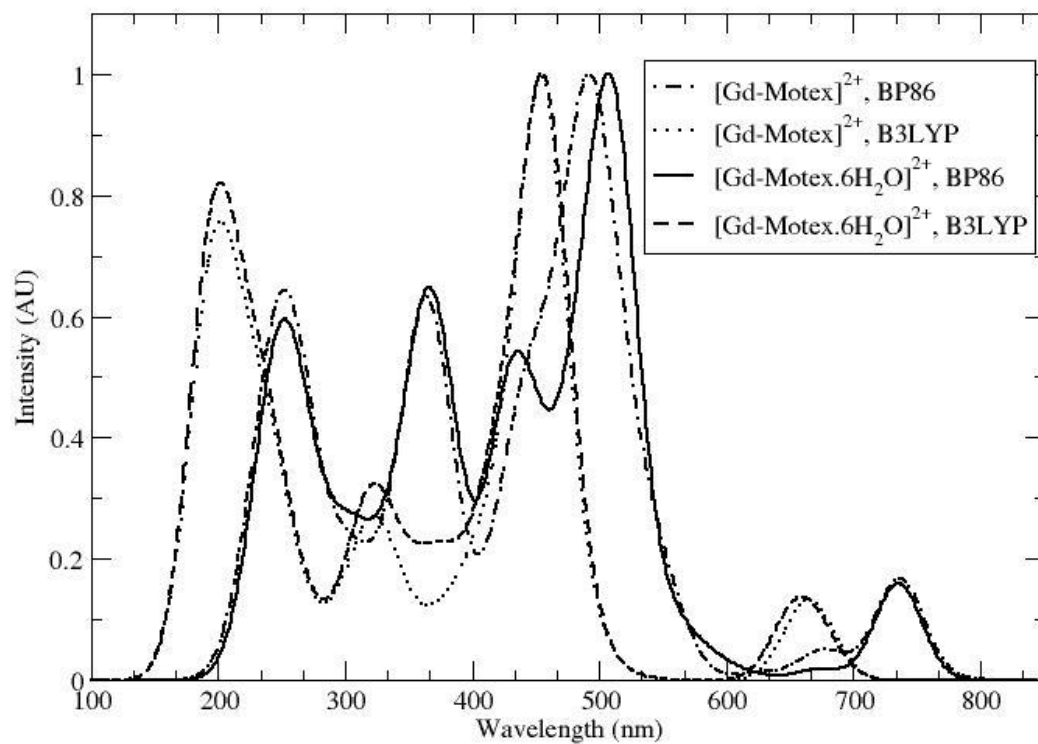

**Fig. S10b:**  
TD-DFT/BP86 and B3LYP absorption spectra in aqueous solution for  $[Gd-Motex]^{2+}$  and  $[Gd-Motex.6H_2O]^{2+}$ .

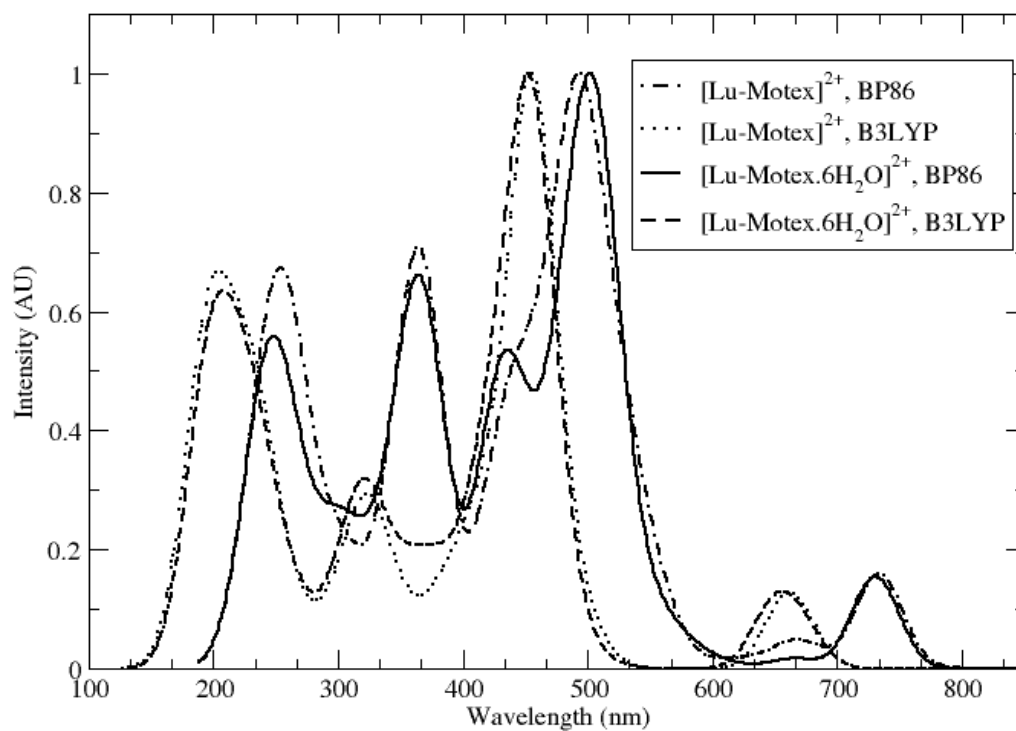

**Fig. S10c:**  
TD-DFT/BP86 and B3LYP absorption spectra in aqueous solution for [Lu-Motex]<sup>2+</sup> and [Lu-Motex.6H<sub>2</sub>O]<sup>2+</sup>.

## II.d. Spin-orbit Effects on the TD-DFT/BP86 Absorption Spectrum of a $C_{30}H_{30}N_5Lu$ Model System

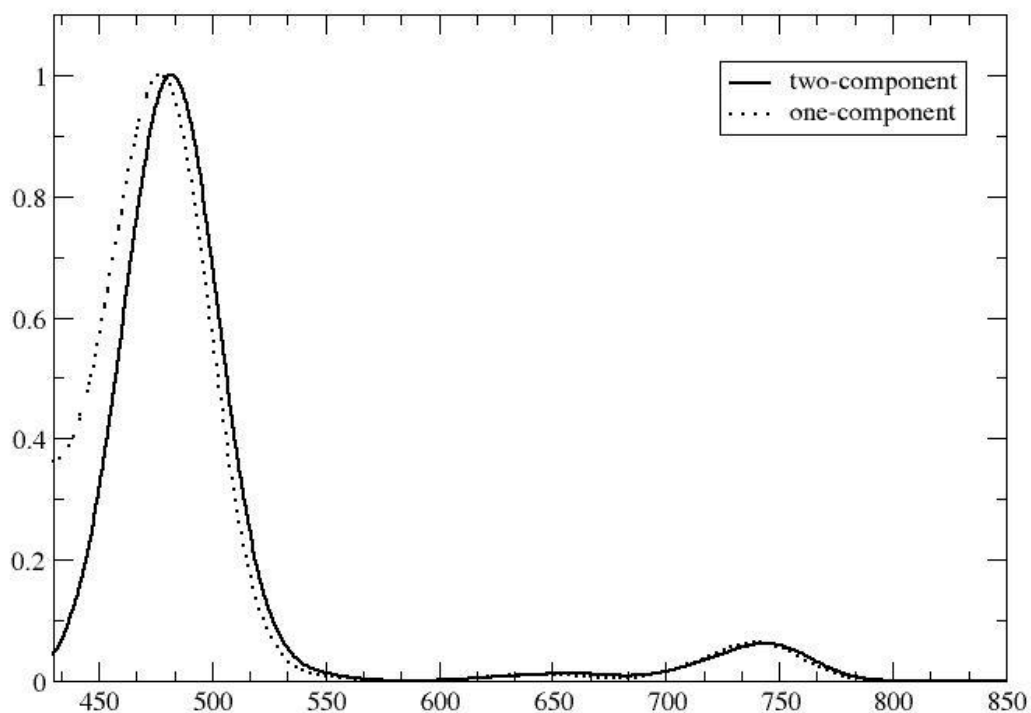

**Fig. S11:**  
Calculated TD-DFT/BP86 absorption spectra in aqueous solution for the model system  $C_{30}H_{30}N_5Lu$  (see scheme S3) using a one- and a two-component formalism.

Obviously spin-orbit effects (originating mainly from the Lu center) have only small effects on the position and the relative intensity of the B- and Q-bands.



2+

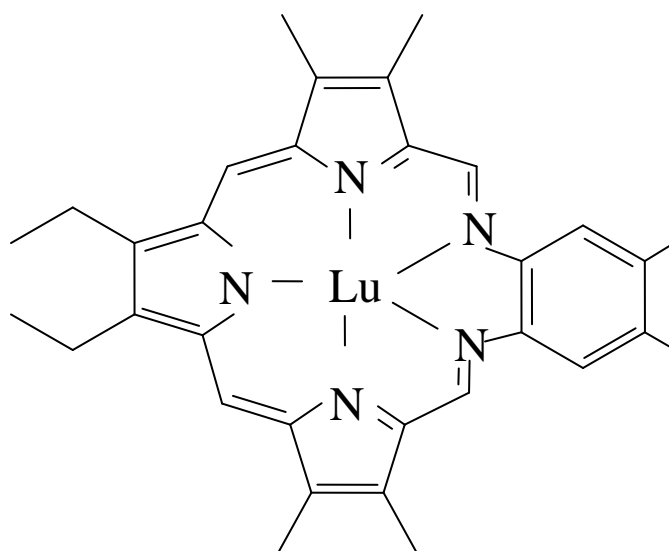

**Scheme S3:**  
**Model system  $C_{30}H_{30}N_5Lu$  used in Fig. S11.**
